# Supplementary material for: Quality of medicines in Canada: a retrospective review of risk communication documents (2005–2013)
Source: PubMed Central journal article supplement — BMJ Open. 2014 Oct 31;4(10):e006088. doi: 10.1136/bmjopen-2014-006088 (PMC4216865; doi:10.1136/bmjopen-2014-006088), 2014-10-31
Supplement: bmjopen-2014-006088.draft_revisions.pdf [file bmjopen-2014-006088.draft_revisions.pdf]

# BMJ Open

## Substandard and falsified medicines in Canada: a retrospective review of risk-communication documents (2005–2013)

|                                 |                                                                                                                                                                                                                        |
|---------------------------------|------------------------------------------------------------------------------------------------------------------------------------------------------------------------------------------------------------------------|
| Journal:                        | <i>BMJ Open</i>                                                                                                                                                                                                        |
| Manuscript ID:                  | bmjopen-2014-006088                                                                                                                                                                                                    |
| Article Type:                   | Research                                                                                                                                                                                                               |
| Date Submitted by the Author:   | 10-Jul-2014                                                                                                                                                                                                            |
| Complete List of Authors:       | Almuzaini, Tariq; University of Nottingham, Academic Division of Child Health<br>Sammons, Helen; University of Nottingham, Child Health<br>Choonara, Imti; University of Nottingham, Academic Division of Child Health |
| <b>Primary Subject Heading</b>: | Public health                                                                                                                                                                                                          |
| Secondary Subject Heading:      | Health policy, Pharmacology and therapeutics                                                                                                                                                                           |
| Keywords:                       | Substandard medicines, Falsified medicines, Drug recalls                                                                                                                                                               |
|                                 |                                                                                                                                                                                                                        |

SCHOLARONE™  
Manuscripts

1  
2  
3 **Substandard and falsified medicines in Canada: a**  
4 **retrospective review of risk-communication documents**  
5 **(2005–2013)**  
6  
7  
8

9  
10 Tariq Almuzaini<sup>1</sup>, Helen Sammons<sup>1</sup>, Imti Choonara<sup>1</sup>

11  
12 (1) Academic Division of Child Health, University of Nottingham, Derbyshire  
13 Children's Hospital, Derby, UK  
14

15  
16  
17  
18 **Corresponding author**

19 Tariq Almuzaini

20 Academic Division of Child Health

21 The Medical School

22 University of Nottingham

23 Derbyshire Children's Hospital

24 Uttoxeter Road

25 Derby DE22 3DT

26 UK

27 Email: [mzxta@exmail.nottingham.ac.uk](mailto:mzxta@exmail.nottingham.ac.uk)  
28  
29  
30  
31  
32  
33  
34  
35  
36  
37  
38  
39

40 **Abstract:** 226 words

41 **Full text:** 2500 words

42 **Number of figures:** 3

43 **Number of tables:** 3  
44  
45  
46  
47  
48  
49  
50

51 **Keywords:** Falsified, substandard, defective, medicines, recalls  
52  
53  
54  
55  
56  
57  
58  
59  
60

## ABSTRACT

**Objective:** To explore the problem of substandard and falsified medicines in Canada.

**Design:** A retrospective review of drug recalls and risk-communication documents.

**Setting:** The Health Canada website search for drug recalls and risk-communication documents issued between 2005 and 2013.

**Eligibility criteria:** Drug recalls and risk-communication documents related to quality defect in medicinal products.

**Main outcome measure:** Relevant data about defective medicines reported in drug recalls and risk communication documents, including description of the defect, type of formulation, year of the recall and category of the recall or the document.

**Results:** There were 653 defective medicines of which 649 were substandard. The number of defective medicines reported by Health Canada increased from 42 in 2005 to 143 in 2013. The two most frequently reported types of defects were stability (205 incidents) and contamination issues (139 incidents). Some of these defects were found to be more prominent and repetitive over other types within some manufacturers. Tablet formulation (251 incidents) was the formulation most frequently compromised. There were four falsified medicines reported over the nine-year period.

**Conclusions:** Substandard medicines are a significant problem in Canada. Their incidence appears to be increasing and they have resulted in a significant number of recalled medicines. Most of the failures were related to stability issues, raising the need to investigate the root causes and for stringent preventative measures to be implemented by manufacturers.

## Strengths and limitations of this study

- It is the first review to assess the problem of substandard and falsified medicines in Canada.
- It quantifies and analyses drug recalls in Canada over a 9- year period.
- Clinical significance of the problem is undetermined, owing to the lack of data from Health Canada regarding adverse events associate with the use of defective medicines.

## INTRODUCTION

Substandard and falsified medicines are a major public health dilemma.<sup>1-4</sup> Different surveys in lower income countries (LIC) and lower-middle-income countries (LMIC) have found that substandard and falsified medicines are readily available.<sup>4, 5</sup> There has been, however, relatively little evidence about the impact of this problem in high income countries (HIC) such as Europe and North America.<sup>4</sup> HIC rely on their national drug regulatory authorities to safe guard the public from the danger of poor quality medicines, as the regulation of medicines are well developed compared to LIC and LMIC.<sup>6</sup> In our previous study on the UK we have shown that substandard medicines are significant problem and appear to be increasing.<sup>7</sup> We wished to explore another HIC and chose Canada, as we have previously studied a European country.

In Canada, Health products are regulated by Health Canada, which is the federal department responsible for the monitoring and regulating of medicines.<sup>8</sup> It issues a number of risk-communication documents to the public and healthcare professionals. These involve identification of the possible risk, assessment of its severity and clarification of the nature of the problem. This communication is established also to initiate and disseminate information regarding defective medicines or existing health risks to allow patients and healthcare professionals to make the right decision.<sup>9</sup>

The aims of this study were to quantify and describe the pattern of drug recalls and risk-communication documents issued by Health Canada and to explore the problem of substandard and falsified medicines in this setting.

## METHODS

Health Canada defines falsified health product (traditionally known as counterfeit) as “one that is represented as, and likely to be mistaken for, an authentic product. Counterfeiting can apply to both branded and generic products, and could relate to a product's identity or source, could include products with the correct ingredients/components, with the wrong ingredient/components, without active ingredients, with insufficient active ingredients or with misleading packaging or labelling.”<sup>10</sup> This definition is similar to the 1992 WHO definition of counterfeit medicine, which has since been updated by the WHO.<sup>11</sup> A substandard medicine is a medicine which does not meet its established quality standards.<sup>12</sup>

A search for defective medicines (i.e., substandard and falsified medicines) was carried out. This was performed through the official Health Canada's website and using the search engine allocated for advisories, warnings, and recalls of health products. Health Canada started posting health product recalls on its website in 2005, thus all recalls issued between 2005 and 2013 were included. All risk-communication documents (advisories, warnings, letters to health professionals and recalls) were reviewed and the relevant information was then extracted.<sup>9</sup> All relevant information regarding defective health products was compiled and exclusion criteria were as follows: medicines lacking efficacy, herbal and probiotic products; dietary and cosmetic products; veterinary medicines; medicines recalled for regulatory reasons; and other health products, such as alcohol swabs and gases. The following data were extracted from the health product recall: name, strength, and dosage form; year of the recall; number of affected batches; nature of the defect; class of drug recall; and action taken regarding defective medicine. Three types of drugs can be distinguished from risk-communication documents; substandard drugs, falsified drugs and drugs withdrawn due to severe adverse drug reactions. The decision on which incident was falsified or substandard is that published by Health Canada.

1  
2  
3 The type of defect were then classified using the same defect classification  
4 used in our previous study.<sup>7</sup> The quality defects were classified as  
5 contamination, minor or major packaging defect, delivery (e.g., leaking bags)  
6 defect, stability failure, potency issues, active ingredient defect and other  
7 issues (such as other deviations concerning non-compliance with good  
8 manufacturing practice at manufacturing site).  
9

10  
11  
12  
13  
14 The WHO Organization Anatomical Therapeutic Chemical (ATC)  
15 Classification System was used to classify the total number of defective  
16 medicine incidents obtained.<sup>13</sup> The first two levels of this classification were  
17 used.  
18  
19

## 20 21 **RESULTS**

22  
23  
24 A total of 653 defective medicines were identified in the Canadian supply  
25 chain (Figure 1). Among these defective medicines, 649 were found to be  
26 substandard medicines, and only four were found to be falsified medicines in  
27 the nine years studied. The rate of reporting defective medicines has  
28 increased each year over the last six years (Figure 2).  
29  
30  
31

### 32 33 **Substandard medicines**

34  
35 Substandard medicines represent the bulk of defective medicines (649  
36 medicines, 99%) reported by Health Canada. The two most frequent types of  
37 defects reported were stability (205 incidents) and contamination (139  
38 incidents) issues (Table 1). Stability of formulations was a significant problem.  
39 The majority of these formulations were found to have degraded one year  
40 after their release into the market, resulting in low concentrations of active  
41 ingredients, impurities, dissolution and disintegration failures. Tablets were  
42 the formulation most frequently reported to be substandard (supplementary  
43 table 1).  
44  
45  
46  
47  
48  
49

50  
51 Among the 649 substandard medicines, 89 were subjected to urgent recalls.  
52 More than half of these medicines (46, 53%) were parenteral formulations  
53 (Tables 2 and 3). Of the 89 medicines that were recalled, 34 were  
54 contaminated. The majority of these were parenteral formulations that were  
55 recalled due to the presence of particulate matters, the presence of microbes,  
56  
57  
58  
59  
60

1  
2  
3 or a lack of sterility assurance during their manufacture (Table 2). The  
4 remaining substandard medicines (55) were urgently recalled due to other  
5 types of defects (Table 3), mainly packaging defects or delivery issues (such  
6 as cracks in the vials or leaks in the bags, as well as faults in the unit used to  
7 deliver the medicines). Packaging defects were one of the major clinical  
8 issues reported, and these included incorrect labelling (i.e., wrong drug name,  
9 strength, or expiry date) and packaging that lacked important information  
10 regarding safety or the use of medicines in the patient information leaflets. In  
11 some cases, the labelling was correct, but the wrong medicines were filled,  
12 resulting in major and urgent recalls of affected batches (Table 3).  
13  
14  
15  
16  
17  
18  
19

20  
21 Drugs that act on the nervous system (141/649), alimentary tract and  
22 metabolism (90/649), and cardiovascular system (83/649) were the subgroups  
23 that most frequently contained substandard medicines. When the second  
24 level of this classification (i.e., therapeutic classification) was used, the top  
25 three groups reported to be substandard were analgesics (65/649),  
26 antihypertensives (50/649) and antibacterials (38/649) (supplementary table  
27 2).  
28  
29  
30  
31  
32

### 33 **Substandard medicines categorised by manufacturers**

34  
35 The review identified 148 manufacturers that were holding the marketing  
36 authorisation for 649 recalled medicines. All manufacturers that held the  
37 marketing authorisation of 8 or more recalled medicines are listed in  
38 supplementary table 3. It was noted that 50% or more of substandard  
39 medicines manufactured by Apotex Inc., Pfizer Canada Inc. and Laboratoire  
40 Riva Inc. had stability issues. Almost half of the substandard products from  
41 Baxter Co., Hospira Healthcare Co. and GlaxoSmithKline Inc. were  
42 contaminated. Products of Sandoz Canada Inc. had a problem with the active  
43 ingredient, which was either too high or too low. More than half of Novartis  
44 products, which are reported to be substandard, were recalled due to delivery  
45 concerns, such as failure of the child-resistant feature of the bottle cap or  
46 leaks in the infusion bags.  
47  
48  
49  
50  
51  
52  
53  
54  
55  
56  
57  
58  
59  
60

### **Falsified medicines**

Four incidents of falsified medicines were identified in Canada's supply chain in 2010, 2011 and 2013. The first incident occurred in 2010 with a falsified Viagra® (sildenafil) product, a sexual enhancement medicine. Details on specific quality defects for this medicine were not provided. The second incident occurred in 2011 with a counterfeit Cialis® (tadalafil), which is also a sexual enhancement medicine. Analysis of the counterfeit revealed that this product contained sildenafil, which is the active ingredient in Viagra®, whereas genuine Cialis contains the active ingredient tadalafil. Two other incidents of falsified Cialis® and Viagra® were also reported in 2013, which were found in retail shops. The falsification was confirmed in cooperation with the legitimate manufacturers of Cialis (i.e., Eli Lilly) and Viagra (i.e., Pfizer).

### **DISCUSSION**

This is the first review that discusses the issue of substandard and falsified medicines in Canada by evaluating the risk-communication documents and drug recalls posted on Health Canada website. Our observations of defective medicines recalls over nine consecutive years, from 2005 to 2013, have shown that the recall of substandard medicines is an increasing trend. It is concerning that over half of the stability failures were related to instability of active ingredients or dissolution and disintegration failure. Both defects have the potential to affect the bioavailability of the active ingredients in the systemic circulation, and in turn, may lead to therapeutic failure.

### **Substandard medicines**

The most frequent type of formulation reported to be substandard were tablets. Tablets have a slow onset of action and require less precaution in terms of sterility, than parenteral formulations. The extent of adverse consequences that can arise from failure to comply with manufacturing requirements, however, cannot be ignored. This was evident from the death of 120 patients in Pakistan due to contamination of isosorbide mononitrate tablets with large doses of an antimalarial drug.<sup>14</sup> Another of the most pronounced examples is the phenobarbital and morphine tablet recalls in



1  
2  
3 Canada. Oversized tablets (i.e. tablets that exceed the weight requirement)  
4 were found in both drugs, raising the risk of the patients to have as much as  
5 double the strength stated on the bottle (Table 3). The Institute for Safe  
6 Medication Practices (ISMP), a non-profit organisation, stated that the US  
7 manufacturer (KV Pharmaceutical) received abnormally high reports of  
8 serious adverse events concerning overdose.<sup>15</sup> Adverse events relating to this  
9 defect have not been documented by Health Canada.  
10

11  
12  
13  
14  
15  
16 It was uncertain whether the rise of substandard medicines incidents were  
17 related to improved detection by Health Canada or due to an increase of  
18 substandard medicine production by manufacturers. The rate of increased  
19 incidence of substandard medicines can be correlated with the  
20 implementation of improved detection policies and regulations by Health  
21 Canada. Introduction of GMP inspection policy for Canadian drug  
22 establishments may be one of the explanations.<sup>16</sup> In January 2008, Health  
23 Canada introduced this policy as a response to increasing demand to update  
24 its policy on GMP, given that so many GMP guidelines and international  
25 agreements had been made since 1996. Subsequently, there has been a  
26 steady increase of incidents of substandard medicines from 2008 to 2013  
27 (Figure 2). This policy illustrates the procedures that the Health Products and  
28 Food Branch (HPFB) follows to ensure that manufacturing sites, distributors  
29 and wholesalers are complying with GMP. It is conducted via inspections by  
30 the HPFB inspectorate with varying cycles, which depend on an approach that  
31 takes risk assessment into consideration, and a ranking scale of priority.<sup>16</sup>  
32 Similarly, it has been highlighted that most of the FDA recalls were related to  
33 FDA inspectors' visits in the USA.<sup>17</sup>  
34  
35  
36  
37  
38  
39  
40  
41  
42  
43  
44  
45

46  
47 Canada and the UK are two of the top pharmaceutical markets in the world,  
48 holding equal global pharmaceutical market share values of USD \$21,877 and  
49 USD \$21,635 billion, respectively.<sup>18</sup> A larger number of substandard  
50 medicines were found in the Canadian supply chain (649 medicines) than in  
51 the UK (280 medicines).<sup>7</sup> The major contributor to this difference in our data  
52 was the number of medicines recalled due to stability problems (Figure 3),  
53 which were responsible for 50% of the difference. The differences in stability  
54 issues between Canada and the UK require further investigation.  
55  
56  
57  
58  
59  
60

### **Falsified medicines**

There were only four incidents of falsified medicines reported by Health Canada in the nine-year period, reported in 2010, 2011 and 2013. In contrast, 11 falsified cases were reported in the UK by the MHRA between 2004 and 2009.<sup>7</sup> In 2010, Health Canada, under the HPFB, published a policy regarding falsified medicines.<sup>10</sup> The aims of the policy are to outline the procedures that are to be carried out in order to tackle the problem. This includes disseminating educational programmes, assessing and identifying the risks, and building bridges between various government organisations in order to undermine the risk. Such organisations include the Canada Border Service Agency (CBSA) and Royal Canadian Mounted Police (RCMP).<sup>10</sup>

In 2009, more than 15,000 falsified tablets were seized by the RCMP in raids against illegal drugs trade in the Montreal region, such as Viagra and cancer drugs. Analysis of these samples was conducted by Health Canada.<sup>19, 20</sup> The presence of falsified medicines in the official supply chain was also reported by the Criminal Intelligence Service Canada. Pharmacy staff of two pharmacies in Ontario were charged for deliberate sale of falsified medicines. These drugs contained the wrong or no active pharmaceutical ingredient. Eleven patients of one pharmacy died after taking Norvasc (amlodipine besylate) tablets, a prescription drug for hypertension and angina. Investigation of the deaths was carried out by the Ontario Coroner's Officer. It revealed that the manner of death was "undetermined" and the cause of death was due to "possible unauthorized medication substitution" in four out of 11 deaths.<sup>21</sup> According to the RCMP, the problem of falsified medicines is a growing trend in Canada.<sup>20, 22</sup> However, Health Canada reports on falsified medicines do not reflect this trend; which means that this problem may be underreported.

### **Manufacturing errors and investigation of the root cause**

It is the responsibility of the manufacturers and marketing authorisation holders to recall their defective products after consultation with Health Canada. The majority of these recalls were issued by the manufacturers or marketing authorisation holders using the health product notice type 1, 2 or 3, which

1  
2  
3 accounted for 95% of the total recalls. Stability issues were mainly identified by  
4 the manufacturers during on-going stability testing. However, it is unknown  
5 whether these defects were identified by internal auditing systems of the  
6 manufacturers, by intervention of the Health Canada inspection team or by  
7 reports from healthcare professionals.  
8  
9

10  
11  
12 Analysing pharmaceutical product recalls can be of great importance to identify  
13 the root causes of recalled medicines. The prompting of a drug recall can be  
14 regarded as a disastrous failure of the manufacturer's quality plan. Even with  
15 stringent quality measures, errors can occur.<sup>23,24</sup> Thus, it is very important to  
16 identify the root cause of the defects to avoid similar episodes in the future. It  
17 has been highlighted in this review that stability failure and contamination issues  
18 were the defect types being reported most frequently. These issues affected  
19 several manufacturers on more than one occasion (supplementary table 3). This  
20 highlights the need for root cause investigations and appropriate measures to be  
21 implemented by manufacturers.  
22  
23  
24  
25  
26  
27  
28

### 29 **Limitations**

30  
31  
32 This study encountered some limitations. Firstly, the expected adverse events  
33 associated with the use of substandard and falsified medicines were not  
34 reported by Health Canada or the manufacturers. Moreover, we were not able  
35 to compare the expected risk with the pharmacovigilance data in Canada, as  
36 this data is not in the public domain. Thus, the clinical significance of the  
37 problem is unknown. Secondly, there are currently scarce reports about  
38 falsified medicines on Health Canada website and on other official  
39 government websites, such as the RCMP and CBSA. The extent of this  
40 problem, therefore, cannot be determined.  
41  
42  
43  
44  
45  
46  
47

### 48 **CONCLUSION**

49  
50 Substandard medicines are a significant problem in Canada. Their incidence  
51 appears to be increasing and they have resulted in a significant number of  
52 recalled medicines. Most of the failures were related to stability issues, raising  
53 the need to investigate the root causes and for stringent preventative  
54 measures to be implemented by manufacturers. Regular GMP inspections on  
55  
56  
57  
58  
59  
60

1  
2  
3 manufacturing sites were highlighted in this review as some of the most  
4 important tools that can improve detection of substandard medicines.  
5  
6

7 **Contributors:**

8 TA and IC conceived the study design and planned the research. TA  
9 performed the database search, extracted the data and drafted the  
10 manuscript. HS double-checked the extracted data, and interpreted the  
11 results. IC and HS edited and reviewed the manuscript. All authors approved  
12 the final version of the manuscript.  
13  
14  
15  
16

17  
18  
19 **Competing interests:** None.  
20

21  
22 **Funding:** This research received no specific grant from any funding agency in  
23 the public, commercial or not-for-profit sectors.  
24  
25

26  
27 **Ethical approval:** Not required.  
28  
29

30 **Data sharing:** No additional data available.  
31  
32  
33  
34  
35  
36  
37  
38  
39  
40  
41  
42  
43  
44  
45  
46  
47  
48  
49  
50  
51  
52  
53  
54  
55  
56  
57  
58  
59  
60

## REFERENCES

1. Bate R, Coticelli P, Tren R, *et al.* Antimalarial drug quality in the most severely malarious parts of Africa – a six country study. *PLoS One* 2008;**3**:e2132.
2. Caudron JM, Ford N, Henkens M, *et al.* Substandard medicines in resource-poor settings: a problem that can no longer be ignored. *Trop Med Int Health* 2008;**13**(8):1062-1072.
3. Attaran A, Barry D, Basheer S, *et al.* How to achieve international action on falsified and substandard medicines. *BMJ* 2012;**345**:e7381.
4. Almuzaini T, Choonara I, Sammons H. Substandard and counterfeit medicines: a systematic review of the literature. *BMJ Open* 2013;**3**:e002923.
5. Bate R, Jensen P, Hess K, *et al.* Substandard and falsified anti-tuberculosis drugs: a preliminary field analysis. *Int J Tuberc Lung Dis* 2013;**17**(3):308-11.
6. WHO. Effective medicines regulation: ensuring safety, efficacy and quality, Issue No.7, November 2003.  
<http://www.who.int/medicines/publications/policyperspectives/en/> (accessed 15 June 2014).
7. Almuzaini T, Sammons H, Choonara I. Substandard and falsified medicines in the UK: a retrospective review of drug alerts (2001–2011). *BMJ Open* 2013;**3**:e002924.
8. Health Canada, Drugs and Health Products. <http://www.hc-sc.gc.ca/dhp-mpps/index-eng.php> (accessed 15 May 2014).
9. Health Canada, Description of Current Risk Communication Documents for Marketed Health Products for Human Use - Guidance Document.  
[http://www.hc-sc.gc.ca/dhp-mpps/pubs/medeff/guide/2008-risk-risques\\_comm\\_guid-dir/index-eng.php](http://www.hc-sc.gc.ca/dhp-mpps/pubs/medeff/guide/2008-risk-risques_comm_guid-dir/index-eng.php). (accessed 15 May 2014).
10. Health Canada, Policy on Counterfeit Health Products (POL-0048).  
[http://www.hc-sc.gc.ca/dhp-mpps/compli-conform/activit/pol\\_0048\\_counterfeit-contrefacon-eng.php](http://www.hc-sc.gc.ca/dhp-mpps/compli-conform/activit/pol_0048_counterfeit-contrefacon-eng.php). (accessed 15 May 2014).
11. WHO. Counterfeit drugs guidelines for the development of measures to combat counterfeit drugs. WHO/EDM/QSM/99.1. Geneva: WHO, 1999.  
[http://whqlibdoc.who.int/hq/1999/WHO\\_EDM\\_QSM\\_99.1.pdf](http://whqlibdoc.who.int/hq/1999/WHO_EDM_QSM_99.1.pdf). (accessed 25 May 2014).
12. WHO. What are substandard medicines?  
<http://www.who.int/medicines/services/counterfeit/faqs/06/en/> (accessed 25 May 2014).
13. WHOCC. ATC Structure and principles.  
[http://www.whocc.no/atc/structure\\_and\\_principles/](http://www.whocc.no/atc/structure_and_principles/) (accessed 15 May 2014).
14. Arie S. Contaminated drugs are held responsible for 120 deaths in Pakistan. *BMJ* 2012;**344**:e951.

15. The Institute for Safe Medication Practices (ISMP). Serious adverse drug event reports increase 25% in 2008. <http://www.ismp.org/QuarterWatch/2008Q4.pdf> (accessed 15 June 2014).
16. Health Canada. GMP Inspection Policy for Canadian Drug Establishments (POL-0011). [http://www.hc-sc.gc.ca/dhp-mps/compli-conform/gmp-bpf/pol/pol\\_0011\\_insp\\_drug\\_ltr-doc-eng.php](http://www.hc-sc.gc.ca/dhp-mps/compli-conform/gmp-bpf/pol/pol_0011_insp_drug_ltr-doc-eng.php). (accessed 27 May 2014).
17. Dickinson J. Most recalls due to FDA Inspection Findings. *Medical Marketing and Media*. 2001;**36**(5):30.
18. Association of the British Pharmaceutical Industry (ABPI). Global pharmaceutical industry and market. <http://www.abpi.org.uk/industry-info/knowledge-hub/global-industry/Pages/industry-market.aspx> (accessed 1 June 2014).
19. Partnership for Safe Medicines (PSM ). Counterfeit Drug Ring Busted in Montreal (2009). <http://www.safemedicines.org/2009/08/counterfeit-drug-.html> (accessed 15 May 2014).
20. Royal Canadian Mounted Police (RCMP). Counterfeit Prescription Drug Distribution Ring Dismantled by the RCMP (2009). <http://www.rcmp-grc.gc.ca/qc/nouv-news/com-rel/2009/08/090807-eng.htm> (accessed 15 May 2014).
21. Criminal Intelligence Service Canada (CISC). Counterfeit Pharmaceuticals in Canada. [http://www.cisc.gc.ca/pharmaceuticals/pharmaceuticals\\_e.html](http://www.cisc.gc.ca/pharmaceuticals/pharmaceuticals_e.html) (accessed 15 May 2014).
22. CTV News. Mounties bust counterfeit pill ring (2009). <http://montreal.ctvnews.ca/mounties-bust-counterfeit-pill-ring-1.423538> (accessed 15 May 2014).
23. The Institute of Medicine (IOM). Countering the Problem of Falsified and Substandard Drugs report. 2013. <http://www.iom.edu/Reports/2013/Countering-the-Problem-of-Falsified-and-Substandard-Drugs.aspx> (accessed 23 June 2014).
24. Food and Drug Administration (FDA). Guidance for Industry: Product Recalls, Including Removals and Corrections, Rockville, MD, 2003. <http://www.fda.gov/Safety/Recalls/IndustryGuidance/ucm129259.htm>. (accessed 27 June 2014).

TABLES AND FIGURES

Figure 1: Flow diagram of search and resulting incidents

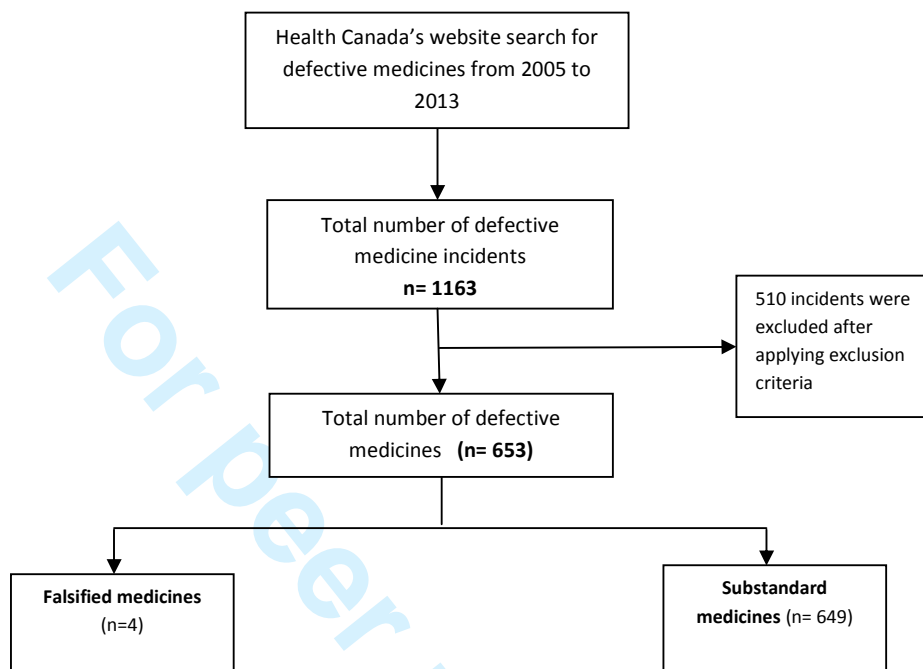

Figure 2: Number of incidents of defective medicines reported by Health Canada

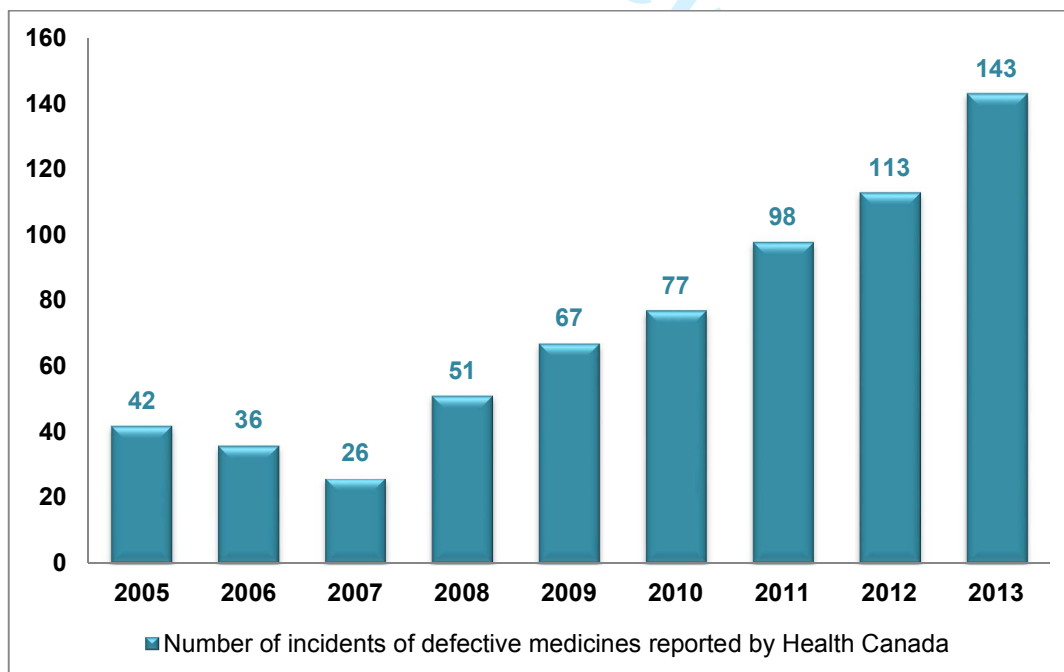

1  
2  
3  
4  
5  
6  
7  
8  
9  
10  
11  
12  
13  
14  
15  
16  
17  
18  
19  
20  
21  
22  
23  
24  
25  
26  
27  
28  
29  
30  
31  
32  
33  
34  
35  
36  
37  
38  
39  
40  
41  
42  
43  
44  
45  
46  
47  
48  
49  
50  
51  
52  
53  
54  
55  
56  
57  
58  
59  
60

**Figure 3: Comparison between Canada and the UK in the types of substandard medicines.**

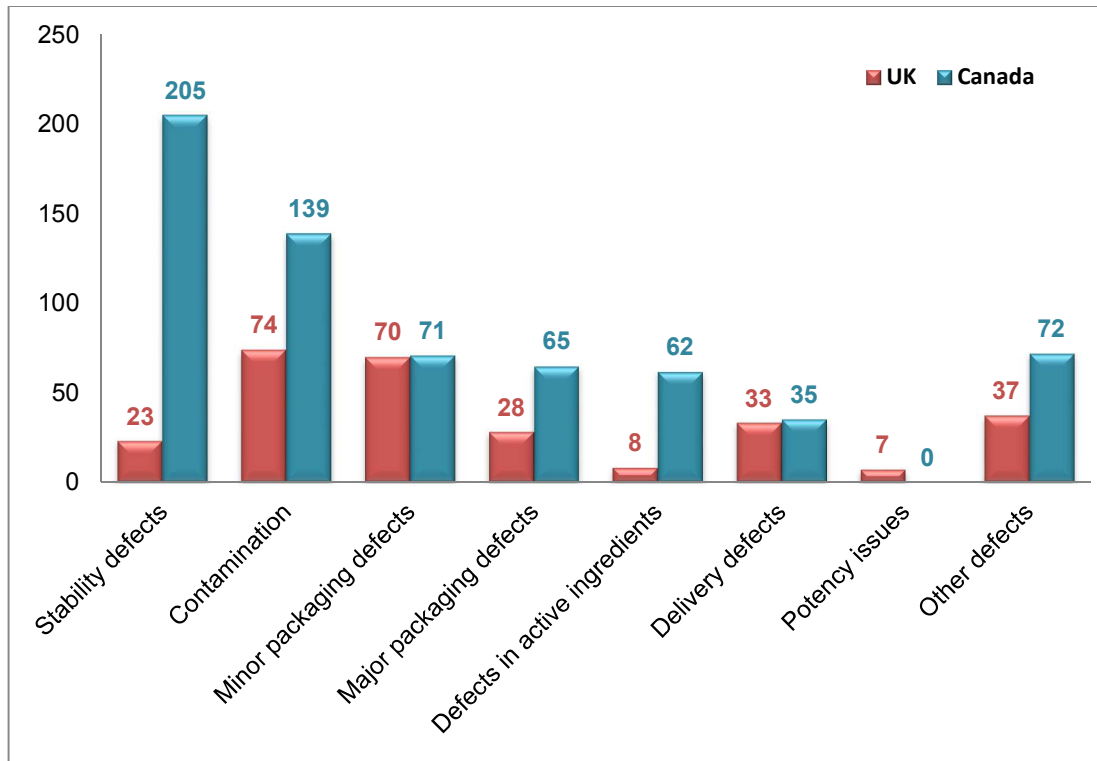

ew only



Table 1: Substandard medicines

| Defect Type                  | Number of medicines | %   | Defect details                                                                                                      | Number of medicines |
|------------------------------|---------------------|-----|---------------------------------------------------------------------------------------------------------------------|---------------------|
| Stability defects            | 205                 | 32  | Concern about stability of active ingredients                                                                       | 63                  |
|                              |                     |     | Levels of impurities in excess of specification at different time points                                            | 50                  |
|                              |                     |     | Dissolution, disintegration and drug release failure                                                                | 45                  |
|                              |                     |     | Others                                                                                                              | 47                  |
| Contamination                | 139                 | 21  | Impurities                                                                                                          | 82                  |
|                              |                     |     | Lack of sterility assurance                                                                                         | 35                  |
|                              |                     |     | Microbial contamination                                                                                             | 22                  |
| Minor packaging defects      | 71                  | 11  | Fault involving the external packaging or minor printing errors that do not involve name or strength of a medicines | 60                  |
|                              |                     |     | Missing or incorrect product registration number, batch number, manufacturer's name or expiry date                  | 11                  |
| Major packaging defects      | 65                  | 10  | Missing or incorrect name ,strength, or active ingredient of a medicine on carton or box                            | 35                  |
|                              |                     |     | Packing a medicine in the wrong carton or present of a foreign tablet or capsule in the bottle or blister           | 30                  |
| Defects in active ingredient | 62                  | 10  | Excessive amount of active ingredients                                                                              | 26                  |
|                              |                     |     | Inadequate amount of active ingredient                                                                              | 20                  |
|                              |                     |     | Active ingredient is out of specification                                                                           | 16                  |
| Delivery defects             | 35                  | 5   | Fault with a device                                                                                                 | 22                  |
|                              |                     |     | Leakage or loose/ tight seal ,cracks in a vial or broken tablets                                                    | 9                   |
|                              |                     |     | Others                                                                                                              | 4                   |
| Other defects                | 72                  | 11  | GMP deficiencies and deviation from preapproved specifications                                                      | 48                  |
|                              |                     |     | Inappropriate shipment                                                                                              | 14                  |
|                              |                     |     | Dissolution / disintegration failure                                                                                | 10                  |
| Total                        | 649                 | 100 |                                                                                                                     | 649                 |

1  
2  
3  
4  
5  
6  
7  
8  
9  
10  
11  
12  
13  
14  
15  
16  
17  
18  
19  
20  
21  
22  
23  
24  
25  
26  
27  
28  
29  
30  
31  
32  
33  
34  
35  
36  
37  
38  
39  
40  
41  
42  
43  
44  
45  
46  
47  
48  
49

**Table 2: Contaminated medicines urgently recalled**

| Medications (number of incidents)                                                                                                | Formulation            | Defect description                                                                                                                  |
|----------------------------------------------------------------------------------------------------------------------------------|------------------------|-------------------------------------------------------------------------------------------------------------------------------------|
| Marcaine (2), acyclovir (1), nitroglycerin (1), magnesium sulfate (1), dexamethasone sodium (1), vistide (1) and carboplatin (1) | Solution for injection | Visible particulates were identified in the formulation (such as white, metallic or glass particles.)                               |
| Propofol (4) and fat emulsion (1)                                                                                                | Emulsion for injection |                                                                                                                                     |
| Extraneal (1) ciprofloxacin (1), carmustine (1), technetium Tc 99m (1) and liposomal amphotericin B (1)                          | Solution for injection | Microbial contamination (bacterial, fungal or viral contamination)                                                                  |
| Docusate sodium (1)                                                                                                              | Capsules               |                                                                                                                                     |
| Sucrose (1)                                                                                                                      | Oral liquid            |                                                                                                                                     |
| Benzalkonium chloride (1)                                                                                                        | Topical Liquid         |                                                                                                                                     |
| Sodium Chloride (1) and dextrose (1)                                                                                             | Solution for injection | Integrity of the foil seal is compromised leading to potential contamination of the vial adapter                                    |
| Dianeal (1), DTE technetium Tc 99m (1), electrolyte infusion (1) and dextrose (1)                                                | Solution for injection | Lack of sterility assurance at the time of manufacture                                                                              |
| Gen Teal Artificial Tears (1)                                                                                                    | Ophthalmic Solution    |                                                                                                                                     |
| Heparin sodium (3)                                                                                                               | Solution for injection | Contamination with heparin-like contaminant                                                                                         |
| Quetiapine (3)                                                                                                                   | Tablets                | cross-contamination of trace amounts of clindamycin in quetiapine active pharmaceutical ingredient during the manufacturing process |

Table 3: Substandard medicines urgently recalled with other defect types

| Type of defect                                          | Medications (number of incidents)                                                                                                  | Formulation            | Defect description                                                                                                                                                                                                                                                                                                                                                                                                                   |
|---------------------------------------------------------|------------------------------------------------------------------------------------------------------------------------------------|------------------------|--------------------------------------------------------------------------------------------------------------------------------------------------------------------------------------------------------------------------------------------------------------------------------------------------------------------------------------------------------------------------------------------------------------------------------------|
| <b>Major packaging defects</b><br>(incorrect labelling) | Trazodone (1), amlodipine (1) and fluvoxamine (1)                                                                                  | Tablets                | Some products contained the wrong medicines due to labelling errors (e.g., amlodipine instead of minocycline, minocycline instead of amlodipine, clonazepam instead of rifampicin and fluphenazine instead of Octreotide) or filling errors (e.g., nabilone instead of trazodone, ciprofloxacin instead of fluvoxamine, trazodone instead of nabilone, Isoproterenol instead of morphine and blue collyrium instead of prednisolone) |
|                                                         | Nabilone (1), minocycline (1) and rifampicin (1)                                                                                   | Capsules               |                                                                                                                                                                                                                                                                                                                                                                                                                                      |
|                                                         | Morphine sulphate (1) and octreotide acetate omega (1)                                                                             | Solution for injection |                                                                                                                                                                                                                                                                                                                                                                                                                                      |
|                                                         | Prednisolone (1)                                                                                                                   | Ophthalmic solution    |                                                                                                                                                                                                                                                                                                                                                                                                                                      |
|                                                         | Hemodialysis acid concentrates (1), remifentanil HCl (1), pamidronate disodium (1), tobramycin (1) and triamcinolone acetonide (1) | Solution for injection | Wrong strength , dosage or expiry date were printed on the packaging                                                                                                                                                                                                                                                                                                                                                                 |
|                                                         | Sodium solysterene sulfonate (1)                                                                                                   | Suspension             |                                                                                                                                                                                                                                                                                                                                                                                                                                      |
|                                                         | Acetaminophen (1)                                                                                                                  | Suppositories          |                                                                                                                                                                                                                                                                                                                                                                                                                                      |
|                                                         | Personnelle cold and flu tablets (2), acetylsalicylic acid (1), acetaminophen (1) and Personelle acid control (1)                  | Tablets                | Important mandatory warning statement was missed on the external packaging                                                                                                                                                                                                                                                                                                                                                           |
|                                                         | Oral contraceptive pills (4)                                                                                                       | Tablets                | Additional placebo tablet was found in place of an active tablet in one blister pack raising the risk of unwanted pregnancy                                                                                                                                                                                                                                                                                                          |
|                                                         | Ibuprofen (2)                                                                                                                      | Tablets                | The label stated that the bottle had a child resistant cap, but the cap used was not child resistant.                                                                                                                                                                                                                                                                                                                                |
| <b>Stability defects</b>                                | Smallpox vaccine (1)                                                                                                               | Solution for injection | Evidence of instability based on its appearance.                                                                                                                                                                                                                                                                                                                                                                                     |
|                                                         | Timolol (1)                                                                                                                        | Ophthalmic Solution    | Active ingredient was out of specification after 12 month of production date                                                                                                                                                                                                                                                                                                                                                         |
|                                                         | Valproic acid (1)                                                                                                                  | Capsules               | Disintegration test failure within the shelf life of the drug                                                                                                                                                                                                                                                                                                                                                                        |
|                                                         | Amoxicillin (1)                                                                                                                    | Suspension             | Out of specification assay result was obtained at various time points.                                                                                                                                                                                                                                                                                                                                                               |
| <b>Active ingredients defects</b>                       | Phenobarbital (1) and morphine SR (1)                                                                                              | Tablets                | Oversized tablets were found raising the risk of overdose                                                                                                                                                                                                                                                                                                                                                                            |
|                                                         | Acetylsalicylic acid (1)                                                                                                           |                        | Inadequate amount of active ingredient                                                                                                                                                                                                                                                                                                                                                                                               |
|                                                         | Delflex (1) and carmustine (1)                                                                                                     | Solution for injection | Excessive amount of active ingredients                                                                                                                                                                                                                                                                                                                                                                                               |
|                                                         | Ethacrynic acid (1)                                                                                                                |                        | Inadequate amount of active ingredient                                                                                                                                                                                                                                                                                                                                                                                               |
| <b>Delivery defects</b>                                 | Paliperidone palmitate (1), nutrinal (1), degarelix (1), caspofungin acetate (1), vancomycin (1) and argatroban (1)                | Solution for injection | Cracks in the syringes or vials , or leaks from the bags were identified raising the risk of contamination                                                                                                                                                                                                                                                                                                                           |
|                                                         | Sumatriptan (1)                                                                                                                    |                        | Pre-filled syringes were filled with needles that protruded through the needle shield                                                                                                                                                                                                                                                                                                                                                |
|                                                         | Morphine sulphate (1)                                                                                                              |                        | Plunger friction with the vial may cause pump occlusion or delivery of inaccurate dose                                                                                                                                                                                                                                                                                                                                               |
|                                                         | Cough and Cold syrup (9)                                                                                                           | Syrup                  | The child-resistant feature of the bottle cap was not functioning properly                                                                                                                                                                                                                                                                                                                                                           |
| <b>Other</b>                                            | Hypromellose (1)                                                                                                                   | lubricant eye gel      | Non-compliance with Good manufacturing practices                                                                                                                                                                                                                                                                                                                                                                                     |

1  
2  
3  
4  
5  
6  
7  
8  
9  
10  
11  
12  
13  
14  
15  
16  
17  
18  
19  
20  
21  
22  
23  
24  
25  
26  
27  
28  
29  
30  
31  
32  
33  
34  
35  
36  
37  
38  
39  
40  
41  
42  
43  
44  
45  
46  
47  
48  
49  
50  
51  
52  
53  
54  
55  
56  
57  
58  
59  
60

For peer review only

**Supplementary data:****Table 1: Number of formulations under each defect type of substandard medicines**

| Defect Type                 | Formulation type     | Number of formulations |
|-----------------------------|----------------------|------------------------|
| Stability defect            | Tablets              | 89                     |
|                             | Parenteral           | 46                     |
|                             | Topical preparations | 34                     |
|                             | Capsules             | 24                     |
|                             | Liquid preparations  | 12                     |
| Contamination               | Parenteral           | 71                     |
|                             | Tablets              | 29                     |
|                             | Topical preparations | 21                     |
|                             | Liquid preparations  | 11                     |
|                             | Capsules             | 7                      |
| Minor packaging defect      | Tablets              | 39                     |
|                             | Parenteral           | 14                     |
|                             | Capsules             | 9                      |
|                             | Liquid preparations  | 5                      |
|                             | Topical preparations | 4                      |
| Major packaging defects     | Tablets              | 35                     |
|                             | Parenteral           | 13                     |
|                             | Capsules             | 11                     |
|                             | Topical preparations | 6                      |
| Defect in active ingredient | Tablets              | 18                     |
|                             | Topical preparations | 16                     |
|                             | Parenteral           | 13                     |
|                             | Liquid preparations  | 8                      |
|                             | Capsules             | 6                      |
| Delivery defect             | Parenteral           | 11                     |
|                             | Liquid preparations  | 10                     |
|                             | Topical preparations | 8                      |
|                             | Tablets              | 6                      |
|                             | Capsules             | 1                      |
| Other defects               | Tablets              | 35                     |
|                             | Parenteral           | 20                     |
|                             | Topical preparations | 11                     |
|                             | Liquid preparations  | 3                      |
|                             | Capsules             | 3                      |
| Total                       |                      | 649                    |

**Table 2: Defective medicines reported by Health Canada, classified according to the organ or system in which they act and according to the therapeutic subgroup they belong (Classification ATC) 2005-2013:**

| Category                                                            | No. | %    | Category                                                                                                                                                            | No.                                 | %                                             |
|---------------------------------------------------------------------|-----|------|---------------------------------------------------------------------------------------------------------------------------------------------------------------------|-------------------------------------|-----------------------------------------------|
| According to organ or system in which the drug acts                 |     |      | According to subgroup, therapeutic main group                                                                                                                       |                                     |                                               |
| Nervous system                                                      | 141 | 21.7 | Analgesics<br>Psycholeptics<br>Psychoanaleptics<br>Anaesthetics<br>Antiepileptics<br>Anti-parkinson drugs                                                           | 65<br>26<br>18<br>15<br>13<br>4     | 10.0<br>4.0<br>2.8<br>2.3<br>2.0<br>0.6       |
| Alimentary tract and metabolism                                     | 90  | 13.9 | Drugs for acid related disorders<br>Vitamins<br>Mineral supplements<br>Laxatives<br>Drugs used in diabetes<br>Drugs for constipation<br>Stomatological preparations | 25<br>22<br>16<br>12<br>9<br>3<br>3 | 3.9<br>3.4<br>2.5<br>1.8<br>1.4<br>0.5<br>0.5 |
| Cardiovascular System                                               | 83  | 12.8 | Antihypertensives<br>Lipid modifying agents<br>Cardiac therapy                                                                                                      | 50<br>24<br>9                       | 7.7<br>3.7<br>1.4                             |
| Anti-infectives for systemic use                                    | 65  | 10.0 | Antibacterials for systemic use<br>Antimycotics for systemic use<br>Immune sera and immunoglobulins<br>Vaccines<br>Antivirals for systemic use                      | 38<br>8<br>8<br>6<br>5              | 5.9<br>1.2<br>1.2<br>0.9<br>0.8               |
| Blood and blood forming organs                                      | 63  | 9.7  | Blood substitutes and perfusion solutions<br>Antithrombotic agents<br>Antianemic preparations                                                                       | 30<br>19<br>14                      | 4.6<br>2.9<br>2.2                             |
| Dermatologicals                                                     | 46  | 7.1  | Corticosteroids, dermatological preparations<br>Other dermatological preparations<br>Anti-acne preparations<br>Antifungals for dermatological use                   | 18<br>14<br>9<br>5                  | 2.8<br>2.2<br>1.4<br>0.8                      |
| Respiratory system                                                  | 31  | 4.8  | Antihistamines for systemic use<br>Cough and cold preparations<br>Drugs for obstructive airway diseases<br>Nasal preparations                                       | 11<br>11<br>7<br>2                  | 1.7<br>1.7<br>1.1<br>0.3                      |
| Genito-urinary system and sex hormones                              | 29  | 4.5  | Sex hormones and modulators of the genital system<br>Urologicals<br>Gynecological anti-infectives and antiseptics                                                   | 22<br>5<br>2                        | 3.4<br>0.8<br>0.3                             |
| Antineoplastic and immunomodulating agents                          | 28  | 4.3  | Antineoplastic agents<br>Immunosuppressants<br>Immunostimulants<br>Endocrine therapy                                                                                | 18<br>4<br>4<br>2                   | 2.8<br>0.6<br>0.6<br>0.3                      |
| Various                                                             | 26  | 4.0  | Diagnostic radiopharmaceuticals<br>All other therapeutic products<br>Contrast media                                                                                 | 20<br>4<br>2                        | 3.1<br>0.6<br>0.3                             |
| Sensory organs                                                      | 21  | 3.2  | Ophthalmologicals<br>Otolologicals                                                                                                                                  | 20<br>1                             | 3.1<br>0.2                                    |
| Musculo-skeletal system                                             | 18  | 2.8  | Anti-inflammatory and antirheumatic products<br>Drugs for treatment of bone diseases<br>Muscle relaxants                                                            | 11<br>6<br>1                        | 1.7<br>0.9<br>0.2                             |
| Systemic hormonal preparations, excluding sex hormones and insulins | 8   | 1.2  | Pituitary and hypothalamic hormones and analogues<br>Pancreatic hormones<br>Pituitary and hypothalamic hormones and analogues                                       | 3<br>3<br>2                         | 0.5<br>0.5<br>0.3                             |
| Total                                                               | 649 | 100  | Total                                                                                                                                                               | 649                                 | 100                                           |

**Table 3: Substandard medicines categorised by manufacturer and type of defects**

| Manufacturer                         | Number of medicines under each type of quality defect |               |                 |                   |                 |          |        | Total | Total number of generic medicines produced by each manufacturer |
|--------------------------------------|-------------------------------------------------------|---------------|-----------------|-------------------|-----------------|----------|--------|-------|-----------------------------------------------------------------|
|                                      | Substandard medicines                                 |               |                 |                   |                 |          |        |       |                                                                 |
|                                      | Stability                                             | Contamination | Minor packaging | Active ingredient | Major packaging | Delivery | Others |       |                                                                 |
| Apotex Inc.                          | 31                                                    | 13            | 4               | 2                 | 2               | 2        | 3      | 57    | 220                                                             |
| Teva Canada Ltd.                     | 15                                                    | 11            | 5               | 7                 | 10              | 2        | 3      | 53    | 224                                                             |
| Pharmascience Inc.                   | 12                                                    | 3             | 3               | 6                 | 6               | 2        | 3      | 35    | 173                                                             |
| Vita Health Products Inc.            | 4                                                     | 0             | 14              | 4                 | 10              | 1        | 0      | 33    | NA                                                              |
| Sandoz Canada Inc.                   | 5                                                     | 8             | 1               | 12                | 5               | 0        | 0      | 31    | 232                                                             |
| Hospira Healthcare Co.               | 1                                                     | 13            | 0               | 0                 | 0               | 3        | 9      | 26    | 94                                                              |
| Novartis Pharmaceuticals Canada Inc. | 4                                                     | 2             | 1               | 1                 | 1               | 13       | 1      | 23    | 114                                                             |
| Pfizer Canada Inc.                   | 10                                                    | 2             | 4               | 1                 | 1               | 1        | 1      | 20    | 120                                                             |
| GlaxoSmithKline Inc.                 | 3                                                     | 8             | 2               | 6                 | 0               | 1        | 0      | 20    | 77                                                              |
| Baxter Co.                           | 2                                                     | 8             | 4               | 0                 | 1               | 1        | 0      | 16    | 58                                                              |
| Sanofi-Aventis Canada Inc.           | 4                                                     | 1             | 2               | 5                 | 0               | 0        | 4      | 16    | 76                                                              |
| Laboratoire Riva Inc                 | 11                                                    | 1             | 0               | 0                 | 0               | 0        | 1      | 13    | NA                                                              |
| Mylan pharmaceuticals                | 0                                                     | 0             | 2               | 1                 | 4               | 1        | 3      | 11    | 145                                                             |
| Pharmetics Inc.                      | 1                                                     | 3             | 0               | 0                 | 0               | 0        | 2      | 10    | NA                                                              |
| JAMP Pharma Co.                      | 4                                                     | 1             | 1               | 3                 | 0               | 0        | 1      | 10    | 37                                                              |
| Pharmaceutical Partners of Canada.   | 2                                                     | 3             | 0               | 0                 | 1               | 1        | 2      | 9     | 40                                                              |
| Schering-Plough Canada Inc.          | 3                                                     | 1             | 2               | 0                 | 0               | 0        | 2      | 8     | 72                                                              |
| McNeil Consumer Products Co.         | 0                                                     | 2             | 1               | 0                 | 0               | 0        | 5      | 8     | 28                                                              |
|                                      |                                                       |               |                 |                   |                 |          |        | 399   |                                                                 |

# BMJ Open

## Quality of medicines in Canada: a retrospective review of risk communication documents (2005–2013)

|                                 |                                                                                                                                                                                                                        |
|---------------------------------|------------------------------------------------------------------------------------------------------------------------------------------------------------------------------------------------------------------------|
| Journal:                        | <i>BMJ Open</i>                                                                                                                                                                                                        |
| Manuscript ID:                  | bmjopen-2014-006088.R1                                                                                                                                                                                                 |
| Article Type:                   | Research                                                                                                                                                                                                               |
| Date Submitted by the Author:   | 26-Aug-2014                                                                                                                                                                                                            |
| Complete List of Authors:       | Almuzaini, Tariq; University of Nottingham, Academic Division of Child Health<br>Sammons, Helen; University of Nottingham, Child Health<br>Choonara, Imti; University of Nottingham, Academic Division of Child Health |
| <b>Primary Subject Heading</b>: | Public health                                                                                                                                                                                                          |
| Secondary Subject Heading:      | Health policy, Pharmacology and therapeutics                                                                                                                                                                           |
| Keywords:                       | Substandard medicines, Falsified medicines, Drug recalls                                                                                                                                                               |
|                                 |                                                                                                                                                                                                                        |

SCHOLARONE™  
Manuscripts

Peer Review Only



1  
2  
3 **Quality of medicines in Canada: a retrospective review of risk**  
4 **communication documents (2005–2013)**  
5  
6  
7

8 Tariq Almuzaini<sup>1</sup>, Helen Sammons<sup>1</sup>, Imti Choonara<sup>1</sup>  
9

10  
11 (1) Academic Division of Child Health, University of Nottingham, Derbyshire  
12 Children's Hospital, Derby, UK  
13

14  
15  
16 **Corresponding author**  
17

18 Tariq Almuzaini  
19

20 Academic Division of Child Health  
21

22 The Medical School  
23

24 University of Nottingham  
25

26 Derbyshire Children's Hospital  
27

28 Uttoxeter Road  
29

30 Derby DE22 3DT  
31

32 UK  
33

34  
35 Email: [mzxta@exmail.nottingham.ac.uk](mailto:mzxta@exmail.nottingham.ac.uk)  
36  
37

38  
39 **Abstract:** 253 words  
40

41 **Full text:** 3220 words  
42

43 **Number of figures:** 3  
44

45 **Number of tables:** 4  
46  
47

48  
49 **Keywords:** Falsified, substandard, defective, medicines, recalls  
50  
51  
52  
53  
54  
55  
56  
57  
58  
59  
60

## ABSTRACT

**Objective:** To explore the quality and safety of medicines in Canada.

**Design:** A retrospective review of drug recalls and risk communication documents conveying issues relating to defective (i.e., substandard and falsified) medicines.

**Setting:** The Health Canada website search for drug recalls and risk communication documents issued between 2005 and 2013.

**Eligibility criteria:** Drug recalls and risk communication documents related to quality defect in medicinal products.

**Main outcome measure:** Relevant data about defective medicines reported in drug recalls and risk communication documents, including description of the defect, type of formulation, year of the recall and category of the recall or the document.

**Results:** There were 653 defective medicines of which 649 were substandard. The number of defective medicines reported by Health Canada increased from 42 in 2005 to 143 in 2013. The two most frequently reported types of defects were stability (205 incidents) and contamination issues (139 incidents). Some of these defects were found to be more prominent and repetitive over other types within some manufacturers. Tablet formulation (251 incidents) was the formulation most frequently compromised. No significant differences were observed between the manufacturers and distributors in the number of substandard medicines reported under each defect type. There were only four falsified medicines reported over the nine-year period.

**Conclusions:** Substandard medicines are an increasing problem in Canada and have resulted in a large number of recalled medicines. Most of the failures were related to stability issues, raising the need to investigate the root causes and for stringent preventative measures to be implemented by manufacturers.

## Strengths and limitations of this study

- It is the first review to assess the problem of defective medicines in Canada.
- It quantifies and analyses drug recalls in Canada over a 9- year period.
- Clinical significance of the problem is undetermined, owing to the lack of data from Health Canada regarding adverse events associated with the use of defective medicines.

## INTRODUCTION

Defective medicines are a major public health problem<sup>1-4</sup> Different surveys in lower income countries (LIC) and lower-middle-income countries (LMIC) have found that defective medicines are readily available.<sup>3, 5</sup>

Defective medicine is a term used to describe any drug with a quality defect, whether the error was due to deliberate falsification or unintentional error during manufacturing.<sup>6, 7</sup> It is a large category that comprises two main types of compromised drugs, substandard and falsified medicines. A substandard medicine is a medicine that does not meet the regulator standards due to an unintentional or negligent error.<sup>8</sup> A falsified medicine, however, is one where deliberate and criminal intent is involved.<sup>8</sup>

In high income countries (HIC), there have been no studies with good methodological quality examining the overall prevalence of substandard or falsified medicines.<sup>3</sup> HIC in Europe and North America, however, enjoy robust surveillance systems that have identified and withdrawn several medicines from the market with serious safety concerns.<sup>9, 10</sup> These surveillance systems have reported numerous incidents of substandard and falsified medicines, and highlighted the problem of such drugs in these countries. Examples of these are the falsified cancer drug, Avastin, and substandard spinal steroid injections reported in the USA.<sup>11, 12</sup> In our previous study on the UK, we studied the problem of defective medicines in the UK by reviewing the drug alerts issued by the drug regulator over an 11-year period. The study showed that substandard medicines are a significant problem that appears to be increasing.<sup>7</sup> We wished to explore another HIC and chose Canada, as the problem of defective medicines has never been explored in this setting.

1  
2  
3 In Canada, Health products are regulated by Health Canada, which is the federal  
4 department responsible for the monitoring and regulating of medicines.<sup>13</sup> It issues a  
5 number of risk communication documents to the public and healthcare professionals.  
6 These involve identification of the possible risk, assessment of its severity and  
7 clarification of the nature of the problem. This communication is also initiated to  
8 disseminate information regarding new safety issues of medicines or existing health  
9 risks to allow healthcare professionals and their patients to make well-informed  
10 decisions about their health.<sup>14</sup>

11  
12  
13  
14  
15  
16  
17 The aim of this study was to explore the quality and safety of medicines in Canada by  
18 analysing the risk communication documents conveying issues relating to defective  
19 medicines.  
20  
21

## 22 23 24 25 **METHODS**

26  
27 Health Canada uses 13 risk communication documents, which can be issued for the  
28 public, healthcare professionals, and hospitals.<sup>14</sup> A preliminary search for these risk  
29 communication documents found that only five documents can be used by Health  
30 Canada to convey any defective health product issue in the Canadian official supply  
31 chain. These can be described as follows:  
32  
33  
34

- 35  
36  
37 • **Public Warning (PW):** issued by Health Canada if the use of the drug can  
38 cause a severe adverse health consequence that may lead to death.
- 39  
40  
41 • **Public Advisory (PA):** issued by Health Canada if exposure to or the use of  
42 the drug can cause adverse health consequences, but is not life threatening  
43 or serious.
- 44  
45  
46 • **Healthcare Professional Communication - Notice to Hospitals (HPC-  
47 NtoH):** to inform the healthcare professional about time-sensitive issues  
48 concerning safety and/or efficacy of medicinal products. It is intended for  
49 hospital use only.
- 50  
51  
52 • **Healthcare Professional Communication - Dear Health Care Professional  
53 Letter (HPC-DHCPL):** to inform the healthcare professional about issues  
54 regarding safety and/or efficacy of medicinal products.  
55  
56  
57  
58  
59  
60

- 1
- 2
- 3
- 4
- 5
- 6
- 7
- 8
- 9
- 10
- 11
- 12
- 13
- 14
- 15
- 16
- 17
- 18
- 19
- 20
- 21
- 22
- 23
- 24
- 25
- 26
- 27
- 28
- 29
- 30
- 31
- 32
- 33
- 34
- 35
- 36
- 37
- 38
- 39
- 40
- 41
- 42
- 43
- 44
- 45
- 46
- 47
- 48
- 49
- 50
- 51
- 52
- 53
- 54
- 55
- 56
- 57
- 58
- 59
- 60
- **Health Product Recall (with type I, II or III):** These can be classified according to the urgency of the recall as follows:
  - Health Product Recall type I: issued if the health product can cause severe adverse health consequence that may lead to death.
  - Health Product Recall type II: issued if the exposure to or the use of the health product can cause adverse health consequences but is not life threatening or serious.
  - Health Product Recall type III: The exposure to or use of the health product is not likely to cause any harm but the recall is initiated for other reasons such as minor deviation from specifications.

Both PW and Health Product Recall type I are considered by Health Canada to be urgent communications, as they are issued for a medicine which may pose a serious health risk. PA, HPC-NtoH, HPC-DHCPL and type II and III Health Product Recalls are semi-urgent communications where the risk associated with the use of a medicine is not serious.<sup>14</sup>

A search for risk communication documents conveying issues relating to defective medicines (i.e., substandard and falsified medicines) was carried out. This was performed through the official Health Canada's website and using the search engine allocated for advisories, warnings, and recalls of health products (<http://www.hc-sc.gc.ca/dhp-mps/medeff/advisories-avis/index-eng.php>). Health Canada started posting Health Product Recalls on its website in 2005. These recalls are the main tool that Health Canada uses to convey quality issues with medicines. Before that, there were only two types of risk communication documents (PA and HPC-DHCPL) available on Health Canada's website. We wanted to examine the same documents throughout the years. Therefore, the search was started from 2005, and all risk communication documents issued between 2005 and 2013 were included. All risk communication documents (PW, PA, HPC-DHCPL, HPC-NtoH and Health Product Recalls) were reviewed and the relevant information was then extracted.

All relevant information regarding defective health products was compiled and exclusion criteria were as follows: veterinary medicines; medicines lacking efficacy; herbal and probiotic products; dietary and cosmetic products; and other natural

1  
2  
3 health product recalled for regulatory reason (i.e., those do not have a valid  
4 marketing authorisation). The following data were extracted from the risk  
5 communication documents: name, strength, and dosage form; year of the document;  
6  
7 nature of the defect; type of drug recall (in the case of Health Product Recalls); and  
8  
9 action to be taken by healthcare professionals or the public regarding the defective  
10  
11 medicine. In the case of Health Product Recalls and PW, the action is to remove the  
12  
13 defective medicine from the dispensary shelves and contact the manufacturer for  
14  
15 return. Whereas, with other risk communication documents where there is no recall  
16  
17 required, healthcare professionals and the public are given advice on how to deal  
18  
19 with defective medicines and to alert the public to be aware of expected risks. Two  
20  
21 types of drugs can be distinguished from risk communication documents;  
22  
23 substandard drugs and falsified drugs. The decision on which incident was falsified  
24  
25 or substandard is that published by Health Canada.

26  
27 The type of defects were then classified using the same classification as used in our  
28  
29 previous study.<sup>7</sup> The quality defects were classified as contamination, minor or major  
30  
31 packaging defect, delivery (e.g., leaking bags) defect, stability failure, potency  
32  
33 issues, active ingredient defect and other issues (such as other deviations  
34  
35 concerning non-compliance with good manufacturing practice at manufacturing site).

36  
37 The WHO Organization Anatomical Therapeutic Chemical (ATC) Classification  
38  
39 System was used to classify defective medicines.<sup>15</sup> The first level of this classification  
40  
41 categorises medicines according to the organ or system in which they act and the  
42  
43 second level classifies medicines according to their main therapeutic group. This  
44  
45 was performed to highlight the most frequent therapeutic classes affected by these  
46  
47 recalls.

### 48 49 **Method of analysis**

50  
51 Minitab (version 16) software was used to store and analyse the data. Descriptive  
52  
53 statistics were used to summarise the results. Marketing authorisation holders of  
54  
55 recalled medicines were either licensed manufacturers or distributors. A comparison  
56  
57 between the manufacturers and distributors in the number of substandard medicines  
58  
59 reported under each type of quality defect was carried out using Fisher's exact test.  
60  
A significant difference was defined at P-value < 0.05.

## RESULTS

A total of 653 defective medicines were identified in the Canadian supply chain (Figure 1). Among these defective medicines, 649 were found to be substandard medicines, and only four were found to be falsified medicines in the nine years studied. The rate of reporting defective medicines has increased each year over the last six years (Figure 2).

### Substandard medicines

Substandard medicines represent the bulk of defective medicines ( $n= 649$ , 99%) reported by Health Canada. The two most frequent types of defects reported were stability ( $n= 205$ , 32%) and contamination ( $n= 139$ , 21%) issues (Table 1). It is clear that substandard medicines with stability defects represent the largest group. The majority of these formulations were found to have degraded one year after their release into the market, resulting in low concentrations of active ingredients, impurities, dissolution and disintegration failures. Tablets were the formulation most frequently reported to be substandard (supplementary table 1).

Among the 649 substandard medicines, 89 (14%) were subjected to urgent communications and therefore required urgent recalls. These medicines were reported using the Health Product Recall type 1 ( $n= 87$ ) and the PW ( $n=2$ ). More than half of these medicines ( $n= 46$ , 53%) were parenteral formulations (Tables 2 and 3). Of the 89 medicines that were recalled, 34 were contaminated. The majority of these were parenteral formulations that were recalled due to the presence of particulate matters, the presence of microbes, or a lack of sterility assurance during their manufacture (Table 2). The remaining substandard medicines ( $n= 55$ ) were urgently recalled due to other types of defects (Table 3), mainly packaging defects or delivery issues (such as cracks in the vials or leaks in the bags, as well as faults in the unit used to deliver the medicines). Packaging defects were one of the major clinical issues reported, and these included incorrect labelling (i.e., wrong drug name, strength, or expiry date) and packaging that lacked important information regarding safety or the use of medicines in the patient information leaflets. In some cases, the labelling was correct, but the wrong medicines were filled, resulting in major and urgent recalls of affected batches (Table 3).



1  
2  
3 Other substandard medicines ( $n= 560$ , 86%) were subjected to semi-urgent recalls  
4 ( $n= 536$ ) or caution in use ( $n= 24$ ). These were reported via the Health Product  
5 Recall type II ( $n= 288$  medicines, 44%) and III ( $n= 245$ , 38%), PA ( $n= 8$ , 1%), HPC-  
6 NtoH ( $n= 9$ , 1%) and HPC-DHCPL ( $n= 7$ , 1%). Three medicines were recalled, but  
7 the corresponding type of Health Product Recall was not given by Health Canada.  
8 The Majority of these drugs had stability, contamination and packaging defects  
9 (supplementary table 2).  
10

11  
12  
13  
14  
15 Drugs that act on the nervous system ( $n= 141$ , 22%), alimentary tract and  
16 metabolism ( $n= 90$ , 14%), and cardiovascular system ( $n= 83$ , 13%) were the  
17 subgroups that most frequently contained substandard medicines. When the second  
18 level of this classification (i.e., therapeutic classification) was used, the top three  
19 groups reported to be substandard were analgesics ( $n= 65$ , 10%), antihypertensives  
20 ( $n= 50$ , 8%) and antibacterials ( $n= 38$ , 6%) (supplementary table 3).  
21  
22  
23  
24  
25  
26  
27  
28

### 29 **Substandard medicines categorised by manufacturers**

30  
31 The review identified 122 licensed manufacturers and 26 licensed distributors.  
32 Manufacturers held the marketing authorisation for 611 substandard medicines and  
33 distributors for 38 (Table 4). No unlicensed manufacturers or distributors were  
34 involved. A comparison between those manufacturers and distributors in the number  
35 of substandard medicines reported under each defect type revealed no significant  
36 differences (Table 4).  
37  
38  
39  
40  
41

42 The top 20 manufacturers are listed in supplementary table 4. It was noted that 50%  
43 or more of substandard medicines manufactured by Apotex Inc., Pfizer Canada Inc.  
44 and Laboratoire Riva Inc. had stability issues. Almost half of the substandard  
45 products from Baxter Co., Hospira Healthcare Co. and GlaxoSmithKline Inc. were  
46 contaminated. Products of Sandoz Canada Inc. had a problem with the active  
47 ingredient, which was either too high or too low. More than half of Novartis products,  
48 which are reported to be substandard, were recalled due to delivery concerns, such  
49 as failure of the child-resistant feature of the bottle cap or leaks in the infusion bags.  
50  
51  
52  
53  
54  
55  
56  
57  
58  
59  
60



### **Falsified medicines**

Four incidents of falsified medicines were identified in Canada's supply chain between 2011 and 2013. All these incidents involved two sexual enhancement medicines, Viagra® (sildenafil) and Cialis® (tadalafil).

In all cases of falsified medicines, Public Advisories were issued to inform the public to contact their healthcare professionals if they had concerns about these falsified medicines. The public was also advised to verify that these products were assessed by Health Canada for safety by looking at the authorisation number printed on the label. These medicines were seized in the retail outlets in Canada, and no further information was given by Health Canada about the subsequent investigation or action taken by Health Canada.

### **DISCUSSION**

This is the first review that discusses the issue of substandard and falsified medicines in Canada by evaluating the risk communication documents and drug recalls posted on Health Canada website. Our observations of defective medicines recalls over nine consecutive years, from 2005 to 2013, have shown that the recall of substandard medicines is an increasing trend. It is concerning that over half of the stability failures were related to instability of active ingredients or dissolution and disintegration failure. Both defects have the potential to affect the bioavailability of the active ingredients in the systemic circulation, and in turn, may lead to therapeutic failure.

### **Substandard medicines**

The most frequent type of formulation reported to be substandard were tablets. Tablets have a slow onset of action and require less precaution in terms of sterility, than parenteral formulations. The extent of adverse consequences that can arise from failure to comply with manufacturing requirements, however, cannot be ignored. This was evident from the death of 120 patients in Pakistan due to contamination of isosorbide mononitrate tablets with large doses of an antimalarial drug.<sup>16</sup> Another of the most pronounced examples is the phenobarbital and morphine tablet recalls in

1  
2  
3 Canada. Oversized tablets (i.e. tablets that exceed the weight requirement) were  
4 found in both drugs, raising the risk of the patients having as much as double the  
5 strength stated on the bottle (Table 3). The Institute for Safe Medication Practices  
6 (ISMP), a non-profit organisation, stated that the US manufacturer (KV  
7 Pharmaceutical) received abnormally high reports of serious adverse events  
8 concerning overdose.<sup>17</sup> Adverse events relating to this defect have not been  
9 documented by Health Canada.  
10

11  
12  
13  
14  
15 It was uncertain whether the rise of substandard medicines incidents were related to  
16 improved detection by Health Canada or due to an increase of substandard medicine  
17 production by manufacturers. The rate of increased incidence of substandard  
18 medicines can be correlated with the implementation of improved detection policies  
19 and regulations by Health Canada. Introduction of Good Manufacturing Practices  
20 (GMP) inspection policy for Canadian drug establishments may be one of the  
21 explanations.<sup>18</sup> In January 2008, Health Canada introduced this policy as a response  
22 to increasing demand to update its policy on GMP, given that so many GMP  
23 guidelines and international agreements had been made since 1996. Subsequently,  
24 there has been a steady increase of incidents of substandard medicines from 2008  
25 to 2013 (Figure 2). This policy illustrates the procedures that the Health Products  
26 and Food Branch (HPFB) follows to ensure that manufacturing sites, distributors and  
27 wholesalers are complying with GMP. It is conducted via inspections by the HPFB  
28 inspectorate with varying cycles, which depend on an approach that takes risk  
29 assessment into consideration, and a ranking scale of priority.<sup>18</sup> Similarly, it has been  
30 highlighted that most of the FDA recalls were related to FDA inspectors' visits in the  
31 USA.<sup>19</sup>  
32  
33  
34  
35  
36  
37  
38  
39  
40  
41  
42  
43  
44

#### 45 **Manufacturing errors and investigation of the root cause**

46  
47 It is the responsibility of the manufacturers and marketing authorisation holders to recall  
48 their substandard products after consultation with Health Canada. The majority of these  
49 recalls were issued by the manufacturers or marketing authorisation holders using the  
50 Health Product Recall type I, II and III, which accounted for 95% of the total  
51 substandard medicines reported. Stability issues were mainly identified by the  
52 manufacturers during on-going stability testing. However, it is unknown whether these  
53 defects were identified by internal auditing systems of the manufacturers, by  
54  
55  
56  
57  
58  
59  
60

1  
2  
3 intervention of the Health Canada inspection team or by reports from healthcare  
4 professionals.  
5

6  
7 Analysing pharmaceutical product recalls can be of great importance to identify the root  
8 causes of recalled medicines. The prompting of a drug recall can be regarded as a  
9 disastrous failure of the manufacturer's quality plan. Even with stringent quality  
10 measures, errors can occur.<sup>20, 21</sup> Thus, it is very important to identify the root cause of  
11 the defects to avoid similar episodes in the future. It has been highlighted in this review  
12 that stability failure and contamination issues were the defect types being reported  
13 most frequently. These issues affected several manufacturers on more than one  
14 occasion (supplementary table 4). This highlights the need for root cause investigations  
15 and appropriate measures to be implemented by manufacturers.  
16  
17  
18  
19  
20  
21

### 22 **Falsified medicines**

23  
24 Only four incidents of falsified medicines were reported by Health Canada. The  
25 detection is extremely low compared with substandard medicine. Health Canada has  
26 robust GMP inspections that cover all drug establishments including manufacturers,  
27 distributors and wholesalers. The reporting system of Health Canada is concerned  
28 with falsified medicines detected within the scope of GMP inspections.<sup>18</sup> Some  
29 falsified medicines may be intercepted and seized by enforcement bodies on their  
30 way to target destinations, but not necessarily intended for the Canadian market.  
31 This may explain the low detection rate by Health Canada.  
32  
33  
34  
35  
36  
37  
38

### 39 **Comparison with the UK**

40  
41 Canada and the UK are two of the top pharmaceutical markets in the world, holding  
42 equal global pharmaceutical market share values of USD \$21,877 and USD \$21,635  
43 billion, respectively.<sup>22</sup> They also use similar approaches in dealing with substandard  
44 medicines based on the expected risk. In the UK, the drug regulator uses four  
45 classes of drug alerts to communicate the risk of substandard medicines to  
46 Healthcare professionals.<sup>6</sup> A request to recall the affected batches is issued with the  
47 first three classes (class 1-3 drug alerts), comparable to the Health Product recall  
48 type I, II and III issued by Health Canada. A class 4 drug alert is issued by the UK  
49 drug regulator when a drug recall is not required, but caution is needed to deal with a  
50 substandard medicine. This type of communication is similar to the PA, HPC-NtoH  
51  
52  
53  
54  
55  
56  
57  
58  
59  
60

1  
2  
3 and HPC-DHCPL used by Health Canada. A class 1 drug recall (issued in the UK),  
4 and both the Health Product recall type I and PW (issued in Canada) are considered  
5 to be urgent communications. The rest of the documents in both countries are  
6 deemed as semi-urgent communications.<sup>6, 14</sup>  
7  
8

9  
10 Out of the 280 substandard medicines found in the UK, 17 (6%) were subject to  
11 urgent communication.<sup>7</sup> The corresponding number in Canada was 89 (13%) out of  
12 649. Overall, a larger number of substandard medicines were found in the Canadian  
13 supply chain (649 medicines) than in the UK (280 medicines).<sup>7</sup> The major contributor  
14 to this difference in our data was the number of medicines recalled due to stability  
15 problems (Figure 3), which were responsible for 50% of the difference. The  
16 differences in stability issues between Canada and the UK require further  
17 investigation.  
18  
19  
20  
21  
22  
23

### 24 **Limitations**

25  
26  
27 This study encountered some limitations. Firstly, the expected adverse events  
28 associated with the use of substandard medicines were not reported by Health  
29 Canada or the manufacturers. Moreover, the adverse reaction database does not  
30 state the batch numbers of medicines reported with the complaint. Therefore we  
31 could not compare the expected risk associated with the recalled batches of  
32 substandard medicines with the adverse drug reaction database. Thus, the clinical  
33 significance of the problem is unknown.  
34  
35  
36  
37  
38  
39  
40  
41

### 42 **CONCLUSION**

43  
44 Substandard medicines are an increasing problem in Canada and have resulted in a  
45 large number of recalled medicines. Most of the failures were related to stability  
46 issues, raising the need to investigate the root causes and for stringent preventative  
47 measures to be implemented by manufacturers. Regular GMP inspections on  
48 manufacturing sites were highlighted in this review as some of the most important  
49 tools that can improve detection of substandard medicines.  
50  
51  
52  
53  
54  
55  
56  
57  
58  
59  
60

**Contributors:**

TA and IC conceived the study design and planned the research. TA performed the database search, extracted the data and drafted the manuscript. HS double-checked the extracted data, and interpreted the results. IC and HS edited and reviewed the manuscript. All authors approved the final version of the manuscript.

**Competing interests:** None.

**Funding:** This research received no specific grant from any funding agency in the public, commercial or not-for-profit sectors.

**Ethical approval:** Not required.

**Data sharing:** No additional data available.

## References

1. Bate R, Coticelli P, Tren R, *et al.* Antimalarial drug quality in the most severely malarious parts of Africa – a six country study. *PLoS One* 2008;**3**:e2132.
2. Caudron JM, Ford N, Henkens M, *et al.* Substandard medicines in resource-poor settings: a problem that can no longer be ignored. *Trop Med Int Health* 2008;**13**(8):1062-1072.
3. Almuzaini T, Choonara I, Sammons H. Substandard and counterfeit medicines: a systematic review of the literature. *BMJ Open* 2013;**3**:e002923.
4. Mackey TK, Liang BA. The global counterfeit drug trade: patient safety and public health risks. *J Pharm Sci* 2011;**100**:4571–9
5. Bate R, Jensen P, Hess K, *et al.* Substandard and falsified anti-tuberculosis drugs: a preliminary field analysis. *Int J Tuberc Lung Dis* 2013;**17**(3):308-11.
6. MHRA. A Guide to Defective Medicinal Products.  
<http://www.mhra.gov.uk/home/groups/is-lic/documents/publication/con007572.pdf> (accessed 15 June 2014).
7. Almuzaini T, Sammons H, Choonara I. Substandard and falsified medicines in the UK: a retrospective review of drug alerts (2001–2011). *BMJ Open* 2013;**3**: e002924.
8. Attaran A, Barry D, Basheer S, *et al.* How to achieve international action on falsified and substandard medicines. *BMJ* 2012;**345**:e7381.
9. Ninan B, Wertheimer A. Withdrawing drugs in the U.S. versus other countries. *Innov Pharm* 2012;**3**(87):1-12.
10. Lexchin J. New drugs and safety: what happened to new active substances approved in Canada between 1995 and 2010? *Arch Intern Med* 2012;**172**(21):1680-1.
11. FDA. Counterfeit Version of Avastin in U.S. Distribution (2012).  
<http://www.fda.gov/drugs/drugsafety/ucm291960.htm> (accessed 15 June 2014).
12. Davies E. More US citizens die from meningitis as scope of inquiry widens. *BMJ* 2012;**345**:e7095.
13. Health Canada. Drugs and Health Products. <http://www.hc-sc.gc.ca/dhp-mps/index-eng.php> (accessed 15 June 2014).
14. Health Canada. Description of Current Risk Communication Documents for Marketed Health Products for Human Use - Guidance Document. [http://www.hc-sc.gc.ca/dhp-mps/pubs/medeff/guide/2008-risk-risques\\_comm\\_guid-dir/index-eng.php](http://www.hc-sc.gc.ca/dhp-mps/pubs/medeff/guide/2008-risk-risques_comm_guid-dir/index-eng.php). (accessed 15 June 2014).
15. WHOCC. ATC Structure and principles.  
[http://www.whooc.no/atc/structure\\_and\\_principles/](http://www.whooc.no/atc/structure_and_principles/) (accessed 15 May 2014).
16. Arie S. Contaminated drugs are held responsible for 120 deaths in Pakistan. *BMJ* 2012;**344**:e951.

- 1
- 2
- 3 17. The Institute for Safe Medication Practices (ISMP). Serious adverse drug event
- 4 reports increase 25% in 2008. <http://www.ismp.org/QuarterWatch/2008Q4.pdf>
- 5 (accessed 15 June 2014).
- 6
- 7 18. Health Canada. GMP Inspection Policy for Canadian Drug Establishments (POL-
- 8 0011).
- 9 [http://www.hc-sc.gc.ca/dhp-mps/compli-conform/gmp-bpf/pol/pol\\_0011\\_insp\\_drug\\_ltr-](http://www.hc-sc.gc.ca/dhp-mps/compli-conform/gmp-bpf/pol/pol_0011_insp_drug_ltr-)
- 10 [doc-eng.php](http://www.hc-sc.gc.ca/dhp-mps/compli-conform/gmp-bpf/pol/pol_0011_insp_drug_ltr-). (accessed 15 June 2014).
- 11
- 12 19. Dickinson J. Most recalls due to FDA Inspection Findings. *Medical Marketing and*
- 13 *Media*. 2001;**36**(5):30.
- 14
- 15 20. The Institute of Medicine (IOM). Countering the Problem of Falsified and Substandard
- 16 Drugs report (2013). [http://www.iom.edu/Reports/2013/Countering-the-Problem-of-](http://www.iom.edu/Reports/2013/Countering-the-Problem-of-Falsified-and-Substandard-Drugs.aspx)
- 17 [Falsified-and-Substandard-Drugs.aspx](http://www.iom.edu/Reports/2013/Countering-the-Problem-of-Falsified-and-Substandard-Drugs.aspx) (accessed 15 June 2014).
- 18
- 19 21. Food and Drug Administration (FDA). Guidance for Industry: Product Recalls,
- 20 Including Removals and Corrections, Rockville, MD, 2003.
- 21 <http://www.fda.gov/Safety/Recalls/IndustryGuidance/ucm129259.htm>. (accessed 27
- 22 June 2014).
- 23
- 24 22. Association of the British Pharmaceutical Industry (ABPI). Global pharmaceutical
- 25 industry and market. <http://www.abpi.org.uk/industry-info/knowledge-hub/global->
- 26 [industry/Pages/industry-market-.aspx](http://www.abpi.org.uk/industry-info/knowledge-hub/global-) (accessed 1 June 2014).
- 27
- 28
- 29
- 30
- 31
- 32
- 33
- 34
- 35
- 36
- 37
- 38
- 39
- 40
- 41
- 42
- 43
- 44
- 45
- 46
- 47
- 48
- 49
- 50
- 51
- 52
- 53
- 54
- 55
- 56
- 57
- 58
- 59
- 60

## TABLES:

Table 1: Substandard medicines

| Defect Type                  | Number of medicines | %   | Defect details                                                                                                      | Number of medicines |
|------------------------------|---------------------|-----|---------------------------------------------------------------------------------------------------------------------|---------------------|
| Stability defects            | 205                 | 32  | Concern about stability of active ingredients                                                                       | 63                  |
|                              |                     |     | Levels of impurities in excess of specification at different time points                                            | 50                  |
|                              |                     |     | Dissolution, disintegration and drug release failure                                                                | 45                  |
|                              |                     |     | Others                                                                                                              | 47                  |
| Contamination                | 139                 | 21  | Impurities                                                                                                          | 82                  |
|                              |                     |     | Lack of sterility assurance                                                                                         | 35                  |
|                              |                     |     | Microbial contamination                                                                                             | 22                  |
| Minor packaging defects      | 71                  | 11  | Fault involving the external packaging or minor printing errors that do not involve name or strength of a medicines | 60                  |
|                              |                     |     | Missing or incorrect product registration number, batch number, manufacturer's name or expiry date                  | 11                  |
| Major packaging defects      | 65                  | 10  | Missing or incorrect name ,strength, or active ingredient of a medicine on carton or box                            | 35                  |
|                              |                     |     | Packing a medicine in the wrong carton or present of a foreign tablet or capsule in the bottle or blister           | 30                  |
| Defects in active ingredient | 62                  | 10  | Excessive amount of active ingredients                                                                              | 26                  |
|                              |                     |     | Inadequate amount of active ingredient                                                                              | 20                  |
|                              |                     |     | Active ingredient is out of specification                                                                           | 16                  |
| Delivery defects             | 35                  | 5   | Fault with a device                                                                                                 | 22                  |
|                              |                     |     | Leakage or loose/ tight seal ,cracks in a vial or broken tablets                                                    | 9                   |
|                              |                     |     | Others                                                                                                              | 4                   |
| Other defects                | 72                  | 11  | GMP deficiencies and deviation from preapproved specifications                                                      | 48                  |
|                              |                     |     | Inappropriate shipment                                                                                              | 14                  |
|                              |                     |     | Dissolution / disintegration failure                                                                                | 10                  |
| Total                        | 649                 | 100 |                                                                                                                     | 649                 |



**Table 2: Contaminated medicines subjected to urgent recalls (Health Product Recall type I).**

| Medications (number of incidents)                                                                                                | Formulation            | Defect description                                                                                                                  |
|----------------------------------------------------------------------------------------------------------------------------------|------------------------|-------------------------------------------------------------------------------------------------------------------------------------|
| Marcaine (2), acyclovir (1), nitroglycerin (1), magnesium sulfate (1), dexamethasone sodium (1), vistide (1) and carboplatin (1) | Solution for injection | Visible particulates were identified in the formulation (such as white, metallic or glass particles.)                               |
| Propofol (4) and fat emulsion (1)                                                                                                | Emulsion for injection |                                                                                                                                     |
| Extraneal (1) ciprofloxacin (1), carmustine (1), technetium Tc 99m (1) and liposomal amphotericin B (1)                          | Solution for injection | Microbial contamination (bacterial, fungal or viral contamination)                                                                  |
| Docusate sodium (1)                                                                                                              | Capsules               |                                                                                                                                     |
| Sucrose (1)                                                                                                                      | Oral liquid            |                                                                                                                                     |
| Benzalkonium chloride (1)                                                                                                        | Topical Liquid         |                                                                                                                                     |
| Sodium Chloride (1) and dextrose (1)                                                                                             | Solution for injection | Integrity of the foil seal is compromised leading to potential contamination of the vial adapter                                    |
| Diameal (1), DTE technetium Tc 99m (1), electrolyte infusion (1) and dextrose (1)                                                | Solution for injection | Lack of sterility assurance at the time of manufacture                                                                              |
| Gen Teal Artificial Tears (1)                                                                                                    | Ophthalmic Solution    |                                                                                                                                     |
| Heparin sodium (3)                                                                                                               | Solution for injection | Contamination with heparin-like contaminant                                                                                         |
| Quetiapine (3)                                                                                                                   | Tablets                | cross-contamination of trace amounts of clindamycin in quetiapine active pharmaceutical ingredient during the manufacturing process |

**Note:** All medicines were reported using health Product Recall Type I document

**Table 3: Substandard medicines subjected to urgent recalls (Health Product Recall type I and PW) with other defect types**

| Type of defect                                          | Medications (number of incidents)                                                                                                  | Formulation                                                                                           | Defect description                                                                                                                                                                                                                                                                                                                                                                                                                   |
|---------------------------------------------------------|------------------------------------------------------------------------------------------------------------------------------------|-------------------------------------------------------------------------------------------------------|--------------------------------------------------------------------------------------------------------------------------------------------------------------------------------------------------------------------------------------------------------------------------------------------------------------------------------------------------------------------------------------------------------------------------------------|
| <b>Major packaging defects</b><br>(incorrect labelling) | Trazodone (1), amlodipine (1) and fluvoxamine (1)                                                                                  | Tablets                                                                                               | Some products contained the wrong medicines due to labelling errors (e.g., amlodipine instead of minocycline, minocycline instead of amlodipine, clonazepam instead of rifampicin and fluphenazine instead of Octreotide) or filling errors (e.g., nabilone instead of trazodone, ciprofloxacin instead of fluvoxamine, trazodone instead of nabilone, Isoproterenol instead of morphine and blue collyrium instead of prednisolone) |
|                                                         | Nabilone (1), minocycline (1) and rifampicin (1)                                                                                   | Capsules                                                                                              |                                                                                                                                                                                                                                                                                                                                                                                                                                      |
|                                                         | Morphine sulphate (1) and octreotide acetate omega (1)                                                                             | Solution for injection                                                                                |                                                                                                                                                                                                                                                                                                                                                                                                                                      |
|                                                         | Prednisolone (1)*                                                                                                                  | Ophthalmic solution                                                                                   |                                                                                                                                                                                                                                                                                                                                                                                                                                      |
|                                                         | Hemodialysis acid concentrates (1), remifentanil HCl (1), pamidronate disodium (1), tobramycin (1) and triamcinolone acetonide (1) | Solution for injection                                                                                | Wrong strength , dosage or expiry date were printed on the packaging                                                                                                                                                                                                                                                                                                                                                                 |
|                                                         | Sodium solysterene sulfonate (1)                                                                                                   | Suspension                                                                                            |                                                                                                                                                                                                                                                                                                                                                                                                                                      |
|                                                         | Acetaminophen (1)                                                                                                                  | Suppositories                                                                                         |                                                                                                                                                                                                                                                                                                                                                                                                                                      |
|                                                         | Personnelle cold and flu tablets (2), acetylsalicylic acid (1), acetaminophen (1) and Personelle acid control (1)                  | Tablets                                                                                               | Important mandatory warning statement was missed on the external packaging                                                                                                                                                                                                                                                                                                                                                           |
|                                                         | Oral contraceptive pills (4)                                                                                                       | Tablets                                                                                               | Additional placebo tablet was found in place of an active tablet in one blister pack raising the risk of unwanted pregnancy                                                                                                                                                                                                                                                                                                          |
| Ibuprofen (2)                                           | Tablets                                                                                                                            | The label stated that the bottle had a child resistant cap, but the cap used was not child resistant. |                                                                                                                                                                                                                                                                                                                                                                                                                                      |
| <b>Stability defects</b>                                | Smallpox vaccine (1)                                                                                                               | Solution for injection                                                                                | Evidence of instability based on its appearance.                                                                                                                                                                                                                                                                                                                                                                                     |
|                                                         | Timolol (1)                                                                                                                        | Ophthalmic Solution                                                                                   | Active ingredient was out of specification after 12 month of production date                                                                                                                                                                                                                                                                                                                                                         |
|                                                         | Valproic acid (1)                                                                                                                  | Capsules                                                                                              | Disintegration test failure within the shelf life of the drug                                                                                                                                                                                                                                                                                                                                                                        |
|                                                         | Amoxicillin (1)                                                                                                                    | Suspension                                                                                            | Out of specification assay result was obtained at various time points.                                                                                                                                                                                                                                                                                                                                                               |
| <b>Active ingredients defects</b>                       | Phenobarbital (1)* and morphine SR (1)                                                                                             | Tablets                                                                                               | Oversized tablets were found raising the risk of overdose                                                                                                                                                                                                                                                                                                                                                                            |
|                                                         | Acetylsalicylic acid (1)                                                                                                           |                                                                                                       | Inadequate amount of active ingredient                                                                                                                                                                                                                                                                                                                                                                                               |
|                                                         | Delflex (1)and carmustine (1)                                                                                                      | Solution for injection                                                                                | Excessive amount of active ingredients                                                                                                                                                                                                                                                                                                                                                                                               |
|                                                         | Ethacrynic acid (1)                                                                                                                |                                                                                                       | Inadequate amount of active ingredient                                                                                                                                                                                                                                                                                                                                                                                               |
| <b>Delivery defects</b>                                 | Paliperidone palmitate (1), nutrinal (1), degarelix (1), caspofungin acetate (1), vancomycin (1) and argatroban (1)                | Solution for injection                                                                                | Cracks in the syringes or vials , or leaks from the bags were identified raising the risk of contamination                                                                                                                                                                                                                                                                                                                           |
|                                                         | Sumatriptan (1)                                                                                                                    |                                                                                                       | Pre-filled syringes were filled with needles that protruded through the needle shield                                                                                                                                                                                                                                                                                                                                                |
|                                                         | Morphine sulphate (1)                                                                                                              |                                                                                                       | Plunger friction with the vial may cause pump occlusion or delivery of inaccurate dose                                                                                                                                                                                                                                                                                                                                               |
|                                                         | Cough and Cold syrup (9)                                                                                                           | Syrup                                                                                                 | The child-resistant feature of the bottle cap was not functioning properly                                                                                                                                                                                                                                                                                                                                                           |
| <b>Other</b>                                            | Hypromellose (1)                                                                                                                   | lubricant eye gel                                                                                     | Non-compliance with Good manufacturing practices                                                                                                                                                                                                                                                                                                                                                                                     |

\*Medicine was reported using the Public Warning document. Others were reported using Health Product Recall type I

**Table 4: Substandard medicines categorised by the type of the Marketing Authorisation Holders**

| Type of quality defect | Medicines marketed by manufacturers<br>(n= 122) | Medicines marketed by distributors<br>(n= 26) | P-Value* |
|------------------------|-------------------------------------------------|-----------------------------------------------|----------|
|                        | Number of medicines, (%)                        | Number of medicines, (%)                      |          |
| Stability              | 191 (31)                                        | 14 (37)                                       | 0.476    |
| Contamination          | 134 (22)                                        | 5 (13)                                        | 0.228    |
| Minor packaging        | 69 (11)                                         | 2 (5)                                         | 0.417    |
| Major packaging        | 60 (10)                                         | 5 (13)                                        | 0.573    |
| Active ingredient      | 59 (10)                                         | 3 (8)                                         | 1.000    |
| Delivery               | 34 (5)                                          | 1 (3)                                         | 0.714    |
| Others                 | 64 (11)                                         | 8 (21)                                        | 0.058    |
| <b>Total</b>           | <b>611 (100)</b>                                | <b>38 (100)</b>                               |          |

\*A significant difference was defined at a p value <0.05.

**Figure legends:**

Figure 1: Flow diagram of search and resulting incidents.

Figure 2: Number of incidents of defective medicines reported by Health Canada.

Figure 3: Comparison between Canada and the UK in the types of substandard medicines.

1  
2  
3 **Quality of medicines in Canada: a retrospective review of risk**  
4 **communication documents (2005–2013)**  
5  
6  
7

8 Tariq Almuzaini<sup>1</sup>, Helen Sammons<sup>1</sup>, Imti Choonara<sup>1</sup>  
9

10  
11 (1) Academic Division of Child Health, University of Nottingham, Derbyshire  
12 Children's Hospital, Derby, UK  
13

14  
15  
16 **Corresponding author**  
17

18 Tariq Almuzaini  
19

20 Academic Division of Child Health  
21

22 The Medical School  
23

24 University of Nottingham  
25

26 Derbyshire Children's Hospital  
27

28 Uttoxeter Road  
29

30 Derby DE22 3DT  
31

32 UK  
33

34  
35 Email: [mzxta@exmail.nottingham.ac.uk](mailto:mzxta@exmail.nottingham.ac.uk)  
36  
37

38  
39 **Abstract:** 253 words  
40

41 **Full text:** 3220 words  
42

43 **Number of figures:** 3  
44

45 **Number of tables:** 4  
46  
47

48  
49 **Keywords:** Falsified, substandard, defective, medicines, recalls  
50  
51  
52  
53  
54  
55  
56  
57  
58  
59  
60

## ABSTRACT

**Objective:** To explore [the quality and safety of medicines](#) in Canada.

**Design:** [A retrospective review of drug recalls and risk communication documents conveying issues relating to defective \(i.e., substandard and falsified\) medicines.](#)

**Setting:** The Health Canada website search for drug recalls and risk communication documents issued between 2005 and 2013.

**Eligibility criteria:** Drug recalls and risk communication documents related to quality defect in medicinal products.

**Main outcome measure:** Relevant data about defective medicines reported in drug recalls and risk communication documents, including description of the defect, type of formulation, year of the recall and category of the recall or the document.

**Results:** There were 653 defective medicines of which 649 were substandard. The number of defective medicines reported by Health Canada increased from 42 in 2005 to 143 in 2013. The two most frequently reported types of defects were stability (205 incidents) and contamination issues (139 incidents). Some of these defects were found to be more prominent and repetitive over other types within some manufacturers. Tablet formulation (251 incidents) was the formulation most frequently compromised. [No significant differences were observed between the manufacturers and distributors in the number of substandard medicines reported under each defect type.](#) There were [only](#) four falsified medicines reported over the nine-year period.

**Conclusions:** Substandard medicines are [an increasing](#) problem in Canada and have resulted in a large number of recalled medicines. Most of the failures were related to stability issues, raising the need to investigate the root causes and for stringent preventative measures to be implemented by manufacturers.

## Strengths and limitations of this study

- It is the first review to assess the problem of defective medicines in Canada.
- It quantifies and analyses drug recalls in Canada over a 9- year period.
- Clinical significance of the problem is undetermined, owing to the lack of data from Health Canada regarding adverse events associated with the use of defective medicines.

## INTRODUCTION

Defective medicines are a major public health problem<sup>1-4</sup> Different surveys in lower income countries (LIC) and lower-middle-income countries (LMIC) have found that defective medicines are readily available.<sup>3, 5</sup>

Defective medicine is a term used to describe any drug with a quality defect, whether the error was due to deliberate falsification or unintentional error during manufacturing.<sup>6, 7</sup> It is a large category that comprises two main types of compromised drugs, substandard and falsified medicines. A substandard medicine is a medicine that does not meet the regulator standards due to an unintentional or negligent error.<sup>8</sup> A falsified medicine, however, is one where deliberate and criminal intent is involved.<sup>8</sup>

In high income countries (HIC), there have been no studies with good methodological quality examining the overall prevalence of substandard or falsified medicines.<sup>3</sup> HIC in Europe and North America, however, enjoy robust surveillance systems that have identified and withdrawn several medicines from the market with serious safety concerns.<sup>9, 10</sup> These surveillance systems have reported numerous incidents of substandard and falsified medicines, and highlighted the problem of such drugs in these countries. Examples of these are the falsified cancer drug, Avastin, and substandard spinal steroid injections reported in the USA.<sup>11, 12</sup> In our previous study on the UK, we studied the problem of defective medicines in the UK by reviewing the drug alerts issued by the drug regulator over an 11-year period. The study showed that substandard medicines are a significant problem that appears to be increasing.<sup>7</sup> We wished to explore another HIC and chose Canada, as the problem of defective medicines has never been explored in this setting.

1  
2  
3 In Canada, Health products are regulated by Health Canada, which is the federal  
4 department responsible for the monitoring and regulating of medicines.<sup>13</sup> It issues a  
5 number of risk communication documents to the public and healthcare professionals.  
6 These involve identification of the possible risk, assessment of its severity and  
7 clarification of the nature of the problem. This communication is also initiated to  
8 disseminate information regarding new safety issues of medicines or existing health  
9 risks to allow healthcare professionals and their patients to make well-informed  
10 decisions about their health.<sup>14</sup>

11  
12  
13  
14  
15  
16  
17 The aim of this study was to explore the quality and safety of medicines in Canada by  
18 analysing the risk communication documents conveying issues relating to defective  
19 medicines.  
20  
21  
22  
23  
24

## 25 METHODS

26  
27 Health Canada uses 13 risk communication documents, which can be issued for the  
28 public, healthcare professionals, and hospitals.<sup>14</sup> A preliminary search for these risk  
29 communication documents found that only five documents can be used by Health  
30 Canada to convey any defective health product issue in the Canadian official supply  
31 chain. These can be described as follows:  
32  
33  
34  
35

- 36  
37 • **Public Warning (PW):** issued by Health Canada if the use of the drug can  
38 cause a severe adverse health consequence that may lead to death.
- 39  
40 • **Public Advisory (PA):** issued by Health Canada if exposure to or the use of  
41 the drug can cause adverse health consequences, but is not life threatening  
42 or serious.
- 43  
44 • **Healthcare Professional Communication - Notice to Hospitals (HPC-  
45 NtoH):** to inform the healthcare professional about time-sensitive issues  
46 concerning safety and/or efficacy of medicinal products. It is intended for  
47 hospital use only.
- 48  
49 • **Healthcare Professional Communication - Dear Health Care Professional  
50 Letter (HPC-DHCPL):** to inform the healthcare professional about issues  
51 regarding safety and/or efficacy of medicinal products.  
52  
53  
54  
55  
56  
57  
58  
59  
60

- 1  
2  
3  
4  
5  
6  
7  
8  
9  
10  
11  
12  
13  
14  
15  
16  
17  
18  
19  
20  
21
- **Health Product Recall (with type I, II or III):** These can be classified according to the urgency of the recall as follows:
    - Health Product Recall type I: issued if the health product can cause severe adverse health consequence that may lead to death.
    - Health Product Recall type II: issued if the exposure to or the use of the health product can cause adverse health consequences but is not life threatening or serious.
    - Health Product Recall type III: The exposure to or use of the health product is not likely to cause any harm but the recall is initiated for other reasons such as minor deviation from specifications.

22  
23  
24  
25  
26  
27  
28  
29  
30

Both PW and Health Product Recall type I are considered by Health Canada to be urgent communications, as they are issued for a medicine which may pose a serious health risk. PA, HPC-NtoH, HPC-DHCPL and type II and III Health Product Recalls are semi-urgent communications where the risk associated with the use of a medicine is not serious.<sup>14</sup>

31  
32  
33  
34  
35  
36  
37  
38  
39  
40  
41  
42  
43  
44  
45  
46  
47  
48  
49  
50  
51  
52

A search for risk communication documents conveying issues relating to defective medicines (i.e., substandard and falsified medicines) was carried out. This was performed through the official Health Canada's website and using the search engine allocated for advisories, warnings, and recalls of health products (<http://www.hc-sc.gc.ca/dhp-mps/medeff/advisories-avis/index-eng.php>). Health Canada started posting Health Product Recalls on its website in 2005. These recalls are the main tool that Health Canada uses to convey quality issues with medicines. Before that, there were only two types of risk communication documents (PA and HPC-DHCPL) available on Health Canada's website. We wanted to examine the same documents throughout the years. Therefore, the search was started from 2005, and all risk communication documents issued between 2005 and 2013 were included. All risk communication documents (PW, PA, HPC-DHCPL, HPC-NtoH and Health Product Recalls) were reviewed and the relevant information was then extracted.

53  
54  
55  
56  
57  
58  
59  
60

All relevant information regarding defective health products was compiled and exclusion criteria were as follows: veterinary medicines; medicines lacking efficacy; herbal and probiotic products; dietary and cosmetic products; and other natural



1  
2  
3 health product recalled for regulatory reason (i.e., those do not have a valid  
4 marketing authorisation). The following data were extracted from the risk  
5 communication documents: name, strength, and dosage form; year of the document;  
6 nature of the defect; type of drug recall (in the case of Health Product Recalls); and  
7 action to be taken by healthcare professionals or the public regarding the defective  
8 medicine. In the case of Health Product Recalls and PW, the action is to remove the  
9 defective medicine from the dispensary shelves and contact the manufacturer for  
10 return. Whereas, with other risk communication documents where there is no recall  
11 required, healthcare professionals and the public are given advice on how to deal  
12 with defective medicines and to alert the public to be aware of expected risks. Two  
13 types of drugs can be distinguished from risk communication documents;  
14 substandard drugs and falsified drugs. The decision on which incident was falsified  
15 or substandard is that published by Health Canada.

16  
17 The type of defects were then classified using the same classification as used in our  
18 previous study.<sup>7</sup> The quality defects were classified as contamination, minor or major  
19 packaging defect, delivery (e.g., leaking bags) defect, stability failure, potency  
20 issues, active ingredient defect and other issues (such as other deviations  
21 concerning non-compliance with good manufacturing practice at manufacturing site).

22  
23 The WHO Organization Anatomical Therapeutic Chemical (ATC) Classification  
24 System was used to classify defective medicines.<sup>15</sup> The first level of this classification  
25 categorises medicines according to the organ or system in which they act and the  
26 second level classifies medicines according to their main therapeutic group. This  
27 was performed to highlight the most frequent therapeutic classes affected by these  
28 recalls.

### 29 30 31 32 33 34 35 36 37 38 39 40 41 42 43 44 45 46 47 48 49 50 51 52 53 54 55 56 57 58 59 60

**Method of analysis**

Minitab (version 16) software was used to store and analyse the data. Descriptive statistics were used to summarise the results. Marketing authorisation holders of recalled medicines were either licensed manufacturers or distributors. A comparison between the manufacturers and distributors in the number of substandard medicines reported under each type of quality defect was carried out using Fisher's exact test. A significant difference was defined at P-value < 0.05.

## RESULTS

A total of 653 defective medicines were identified in the Canadian supply chain (Figure 1). Among these defective medicines, 649 were found to be substandard medicines, and only four were found to be falsified medicines in the nine years studied. The rate of reporting defective medicines has increased each year over the last six years (Figure 2).

### Substandard medicines

Substandard medicines represent the bulk of defective medicines ( $n= 649$ , 99%) reported by Health Canada. The two most frequent types of defects reported were stability ( $n= 205$ , 32%) and contamination ( $n= 139$ , 21%) issues (Table 1). It is clear that substandard medicines with stability defects represent the largest group. The majority of these formulations were found to have degraded one year after their release into the market, resulting in low concentrations of active ingredients, impurities, dissolution and disintegration failures. Tablets were the formulation most frequently reported to be substandard (supplementary table 1).

Among the 649 substandard medicines, 89 (14%) were subjected to urgent communications and therefore required urgent recalls. These medicines were reported using the Health Product Recall type 1 ( $n= 87$ ) and the PW ( $n=2$ ). More than half of these medicines ( $n= 46$ , 53%) were parenteral formulations (Tables 2 and 3). Of the 89 medicines that were recalled, 34 were contaminated. The majority of these were parenteral formulations that were recalled due to the presence of particulate matters, the presence of microbes, or a lack of sterility assurance during their manufacture (Table 2). The remaining substandard medicines ( $n= 55$ ) were urgently recalled due to other types of defects (Table 3), mainly packaging defects or delivery issues (such as cracks in the vials or leaks in the bags, as well as faults in the unit used to deliver the medicines). Packaging defects were one of the major clinical issues reported, and these included incorrect labelling (i.e., wrong drug name, strength, or expiry date) and packaging that lacked important information regarding safety or the use of medicines in the patient information leaflets. In some cases, the labelling was correct, but the wrong medicines were filled, resulting in major and urgent recalls of affected batches (Table 3).

1  
2  
3 Other substandard medicines ( $n= 560$ , 86%) were subjected to semi-urgent recalls  
4 ( $n= 536$ ) or caution in use ( $n= 24$ ). These were reported via the Health Product  
5 Recall type II ( $n= 288$  medicines, 44%) and III ( $n= 245$ , 38%), PA ( $n= 8$ , 1%), HPC-  
6 NtoH ( $n= 9$ , 1%) and HPC-DHCPL ( $n= 7$ , 1%). Three medicines were recalled, but  
7 the corresponding type of Health Product Recall was not given by Health Canada.  
8 The Majority of these drugs had stability, contamination and packaging defects  
9 (supplementary table 2).  
10

11  
12  
13  
14  
15  
16  
17  
18  
19  
20  
21  
22  
23  
24  
25  
26  
27  
28  
29  
30  
31  
32  
33  
34  
35  
36  
37  
38  
39  
40  
41  
42  
43  
44  
45  
46  
47  
48  
49  
50  
51  
52  
53  
54  
55  
56  
57  
58  
59  
60

Drugs that act on the nervous system ( $n= 141$ , 22%), alimentary tract and metabolism ( $n= 90$ , 14%), and cardiovascular system ( $n= 83$ , 13%) were the subgroups that most frequently contained substandard medicines. When the second level of this classification (i.e., therapeutic classification) was used, the top three groups reported to be substandard were analgesics ( $n= 65$ , 10%), antihypertensives ( $n= 50$ , 8%) and antibacterials ( $n= 38$ , 6%) (supplementary table 3).

### **Substandard medicines categorised by manufacturers**

The review identified 122 licensed manufacturers and 26 licensed distributors. Manufacturers held the marketing authorisation for 611 substandard medicines and distributors for 38 (Table 4). No unlicensed manufacturers or distributors were involved. A comparison between those manufacturers and distributors in the number of substandard medicines reported under each defect type revealed no significant differences (Table 4).

The top 20 manufacturers are listed in supplementary table 4. It was noted that 50% or more of substandard medicines manufactured by Apotex Inc., Pfizer Canada Inc. and Laboratoire Riva Inc. had stability issues. Almost half of the substandard products from Baxter Co., Hospira Healthcare Co. and GlaxoSmithKline Inc. were contaminated. Products of Sandoz Canada Inc. had a problem with the active ingredient, which was either too high or too low. More than half of Novartis products, which are reported to be substandard, were recalled due to delivery concerns, such as failure of the child-resistant feature of the bottle cap or leaks in the infusion bags.

### **Falsified medicines**

Four incidents of falsified medicines were identified in Canada's supply chain between 2011 and 2013. All these incidents involved two sexual enhancement medicines, Viagra® (sildenafil) and Cialis® (tadalafil).

In all cases of falsified medicines, Public Advisories were issued to inform the public to contact their healthcare professionals if they had concerns about these falsified medicines. The public was also advised to verify that these products were assessed by Health Canada for safety by looking at the authorisation number printed on the label. These medicines were seized in the retail outlets in Canada, and no further information was given by Health Canada about the subsequent investigation or action taken by Health Canada.

### **DISCUSSION**

This is the first review that discusses the issue of substandard and falsified medicines in Canada by evaluating the risk communication documents and drug recalls posted on Health Canada website. Our observations of defective medicines recalls over nine consecutive years, from 2005 to 2013, have shown that the recall of substandard medicines is an increasing trend. It is concerning that over half of the stability failures were related to instability of active ingredients or dissolution and disintegration failure. Both defects have the potential to affect the bioavailability of the active ingredients in the systemic circulation, and in turn, may lead to therapeutic failure.

#### **Substandard medicines**

The most frequent type of formulation reported to be substandard were tablets. Tablets have a slow onset of action and require less precaution in terms of sterility, than parenteral formulations. The extent of adverse consequences that can arise from failure to comply with manufacturing requirements, however, cannot be ignored. This was evident from the death of 120 patients in Pakistan due to contamination of isosorbide mononitrate tablets with large doses of an antimalarial drug.<sup>16</sup> Another of the most pronounced examples is the phenobarbital and morphine tablet recalls in

1  
2  
3 Canada. Oversized tablets (i.e. tablets that exceed the weight requirement) were  
4 found in both drugs, raising the risk of the patients **having** as much as double the  
5 strength stated on the bottle (Table 3). The Institute for Safe Medication Practices  
6 (ISMP), a non-profit organisation, stated that the US manufacturer (KV  
7 Pharmaceutical) received abnormally high reports of serious adverse events  
8 concerning overdose.<sup>17</sup> Adverse events relating to this defect have not been  
9 documented by Health Canada.  
10

11  
12  
13  
14  
15 It was uncertain whether the rise of substandard medicines incidents were related to  
16 improved detection by Health Canada or due to an increase of substandard medicine  
17 production by manufacturers. The rate of increased incidence of substandard  
18 medicines can be correlated with the implementation of improved detection policies  
19 and regulations by Health Canada. Introduction of **Good Manufacturing Practices**  
20 (GMP) inspection policy for Canadian drug establishments may be one of the  
21 explanations.<sup>18</sup> In January 2008, Health Canada introduced this policy as a response  
22 to increasing demand to update its policy on GMP, given that so many GMP  
23 guidelines and international agreements had been made since 1996. Subsequently,  
24 there has been a steady increase of incidents of substandard medicines from 2008  
25 to 2013 (Figure 2). This policy illustrates the procedures that the Health Products  
26 and Food Branch (HPFB) follows to ensure that manufacturing sites, distributors and  
27 wholesalers are complying with GMP. It is conducted via inspections by the HPFB  
28 inspectorate with varying cycles, which depend on an approach that takes risk  
29 assessment into consideration, and a ranking scale of priority.<sup>18</sup> Similarly, it has been  
30 highlighted that most of the FDA recalls were related to FDA inspectors' visits in the  
31 USA.<sup>19</sup>  
32  
33  
34  
35  
36  
37  
38  
39  
40  
41  
42  
43  
44

#### 45 **Manufacturing errors and investigation of the root cause**

46  
47 It is the responsibility of the manufacturers and marketing authorisation holders to recall  
48 their substandard products after consultation with Health Canada. The majority of these  
49 recalls were issued by the manufacturers or marketing authorisation holders using the  
50 Health Product Recall type I, II and III, which accounted for 95% of the total  
51 substandard medicines reported. Stability issues were mainly identified by the  
52 manufacturers during on-going stability testing. However, it is unknown whether these  
53 defects were identified by internal auditing systems of the manufacturers, by  
54  
55  
56  
57  
58  
59  
60

1  
2  
3 intervention of the Health Canada inspection team or by reports from healthcare  
4 professionals.  
5

6  
7 Analysing pharmaceutical product recalls can be of great importance to identify the root  
8 causes of recalled medicines. The prompting of a drug recall can be regarded as a  
9 disastrous failure of the manufacturer's quality plan. Even with stringent quality  
10 measures, errors can occur.<sup>20, 21</sup> Thus, it is very important to identify the root cause of  
11 the defects to avoid similar episodes in the future. It has been highlighted in this review  
12 that stability failure and contamination issues were the defect types being reported  
13 most frequently. These issues affected several manufacturers on more than one  
14 occasion (supplementary table 4). This highlights the need for root cause investigations  
15 and appropriate measures to be implemented by manufacturers.  
16  
17

### 18 **Falsified medicines**

19  
20 Only four incidents of falsified medicines were reported by Health Canada. The  
21 detection is extremely low compared with substandard medicine. Health Canada has  
22 robust GMP inspections that cover all drug establishments including manufacturers,  
23 distributors and wholesalers. The reporting system of Health Canada is concerned  
24 with falsified medicines detected within the scope of GMP inspections.<sup>18</sup> Some  
25 falsified medicines may be intercepted and seized by enforcement bodies on their  
26 way to target destinations, but not necessarily intended for the Canadian market.  
27 This may explain the low detection rate by Health Canada.  
28  
29

### 30 **Comparison with the UK**

31  
32 Canada and the UK are two of the top pharmaceutical markets in the world, holding  
33 equal global pharmaceutical market share values of USD \$21,877 and USD \$21,635  
34 billion, respectively.<sup>22</sup> They also use similar approaches in dealing with substandard  
35 medicines based on the expected risk. In the UK, the drug regulator uses four  
36 classes of drug alerts to communicate the risk of substandard medicines to  
37 Healthcare professionals.<sup>6</sup> A request to recall the affected batches is issued with the  
38 first three classes (class 1-3 drug alerts), comparable to the Health Product recall  
39 type I, II and III issued by Health Canada. A class 4 drug alert is issued by the UK  
40 drug regulator when a drug recall is not required, but caution is needed to deal with a  
41 substandard medicine. This type of communication is similar to the PA, HPC-NtoH  
42  
43  
44  
45  
46  
47  
48  
49  
50  
51  
52  
53  
54  
55  
56  
57  
58  
59  
60

1  
2  
3 and HPC-DHCPL used by Health Canada. A class 1 drug recall (issued in the UK),  
4 and both the Health Product recall type I and PW (issued in Canada) are considered  
5 to be urgent communications. The rest of the documents in both countries are  
6 deemed as semi-urgent communications.<sup>6, 14</sup>  
7  
8

9  
10 Out of the 280 substandard medicines found in the UK, 17 (6%) were subject to  
11 urgent communication.<sup>7</sup> The corresponding number in Canada was 89 (13%) out of  
12 649. Overall, a larger number of substandard medicines were found in the Canadian  
13 supply chain (649 medicines) than in the UK (280 medicines).<sup>7</sup> The major contributor  
14 to this difference in our data was the number of medicines recalled due to stability  
15 problems (Figure 3), which were responsible for 50% of the difference. The  
16 differences in stability issues between Canada and the UK require further  
17 investigation.  
18  
19

## 20 21 22 23 24 25 **Limitations**

26  
27 This study encountered some limitations. Firstly, the expected adverse events  
28 associated with the use of substandard medicines were not reported by Health  
29 Canada or the manufacturers. Moreover, the adverse reaction database **does not**  
30 **state the batch numbers of medicines reported with the complaint. Therefore we**  
31 **could not compare the expected risk associated with the recalled batches of**  
32 **substandard medicines with the adverse drug reaction database.** Thus, the clinical  
33 significance of the problem is unknown.  
34  
35  
36  
37  
38  
39  
40  
41

## 42 43 44 45 **CONCLUSION**

46 Substandard medicines are **an increasing** problem in Canada and have resulted in a  
47 large number of recalled medicines. Most of the failures were related to stability  
48 issues, raising the need to investigate the root causes and for stringent preventative  
49 measures to be implemented by manufacturers. Regular GMP inspections on  
50 manufacturing sites were highlighted in this review as some of the most important  
51 tools that can improve detection of substandard medicines.  
52  
53  
54  
55  
56  
57  
58  
59  
60



**Contributors:**

TA and IC conceived the study design and planned the research. TA performed the database search, extracted the data and drafted the manuscript. HS double-checked the extracted data, and interpreted the results. IC and HS edited and reviewed the manuscript. All authors approved the final version of the manuscript.

**Competing interests:** None.

**Funding:** This research received no specific grant from any funding agency in the public, commercial or not-for-profit sectors.

**Ethical approval:** Not required.

**Data sharing:** No additional data available.



## References

1. Bate R, Coticelli P, Tren R, *et al.* Antimalarial drug quality in the most severely malarious parts of Africa – a six country study. *PLoS One* 2008;**3**:e2132.
2. Caudron JM, Ford N, Henkens M, *et al.* Substandard medicines in resource-poor settings: a problem that can no longer be ignored. *Trop Med Int Health* 2008;**13**(8):1062-1072.
3. Almuzaini T, Choonara I, Sammons H. Substandard and counterfeit medicines: a systematic review of the literature. *BMJ Open* 2013;**3**:e002923.
4. Mackey TK, Liang BA. The global counterfeit drug trade: patient safety and public health risks. *J Pharm Sci* 2011;**100**:4571–9
5. Bate R, Jensen P, Hess K, *et al.* Substandard and falsified anti-tuberculosis drugs: a preliminary field analysis. *Int J Tuberc Lung Dis* 2013;**17**(3):308-11.
6. MHRA. A Guide to Defective Medicinal Products.  
<http://www.mhra.gov.uk/home/groups/is-lic/documents/publication/con007572.pdf> (accessed 15 June 2014).
7. Almuzaini T, Sammons H, Choonara I. Substandard and falsified medicines in the UK: a retrospective review of drug alerts (2001–2011). *BMJ Open* 2013;**3**: e002924.
8. Attaran A, Barry D, Basheer S, *et al.* How to achieve international action on falsified and substandard medicines. *BMJ* 2012;**345**:e7381.
9. Ninan B, Wertheimer A. Withdrawing drugs in the U.S. versus other countries. *Innov Pharm* 2012;**3**(87):1-12.
10. Lexchin J. New drugs and safety: what happened to new active substances approved in Canada between 1995 and 2010? *Arch Intern Med* 2012;**172**(21):1680-1.
11. FDA. Counterfeit Version of Avastin in U.S. Distribution (2012).  
<http://www.fda.gov/drugs/drugsafety/ucm291960.htm> (accessed 15 June 2014).
12. Davies E. More US citizens die from meningitis as scope of inquiry widens. *BMJ* 2012;**345**:e7095.
13. Health Canada. Drugs and Health Products. <http://www.hc-sc.gc.ca/dhp-mps/index-eng.php> (accessed 15 June 2014).
14. Health Canada. Description of Current Risk Communication Documents for Marketed Health Products for Human Use - Guidance Document. [http://www.hc-sc.gc.ca/dhp-mps/pubs/medeff/guide/2008-risk-risques\\_comm\\_guid-dir/index-eng.php](http://www.hc-sc.gc.ca/dhp-mps/pubs/medeff/guide/2008-risk-risques_comm_guid-dir/index-eng.php). (accessed 15 June 2014).
15. WHOCC. ATC Structure and principles.  
[http://www.whooc.no/atc/structure\\_and\\_principles/](http://www.whooc.no/atc/structure_and_principles/) (accessed 15 May 2014).
16. Arie S. Contaminated drugs are held responsible for 120 deaths in Pakistan. *BMJ* 2012;**344**:e951.

17. The Institute for Safe Medication Practices (ISMP). Serious adverse drug event reports increase 25% in 2008. <http://www.ismp.org/QuarterWatch/2008Q4.pdf> (accessed 15 June 2014).
18. Health Canada. GMP Inspection Policy for Canadian Drug Establishments (POL-0011). [http://www.hc-sc.gc.ca/dhp-mps/compli-conform/gmp-bpf/pol/pol\\_0011\\_insp\\_drug\\_ltr-doc-eng.php](http://www.hc-sc.gc.ca/dhp-mps/compli-conform/gmp-bpf/pol/pol_0011_insp_drug_ltr-doc-eng.php). (accessed 15 June 2014).
19. Dickinson J. Most recalls due to FDA Inspection Findings. *Medical Marketing and Media*. 2001;**36**(5):30.
20. The Institute of Medicine (IOM). Countering the Problem of Falsified and Substandard Drugs report (2013). <http://www.iom.edu/Reports/2013/Countering-the-Problem-of-Falsified-and-Substandard-Drugs.aspx> (accessed 15 June 2014).
21. Food and Drug Administration (FDA). Guidance for Industry: Product Recalls, Including Removals and Corrections, Rockville, MD, 2003. <http://www.fda.gov/Safety/Recalls/IndustryGuidance/ucm129259.htm>. (accessed 27 June 2014).
22. Association of the British Pharmaceutical Industry (ABPI). Global pharmaceutical industry and market. <http://www.abpi.org.uk/industry-info/knowledge-hub/global-industry/Pages/industry-market-.aspx> (accessed 1 June 2014).

## TABLES:

Table 1: Substandard medicines

| Defect Type                  | Number of medicines | %   | Defect details                                                                                                      | Number of medicines |
|------------------------------|---------------------|-----|---------------------------------------------------------------------------------------------------------------------|---------------------|
| Stability defects            | 205                 | 32  | Concern about stability of active ingredients                                                                       | 63                  |
|                              |                     |     | Levels of impurities in excess of specification at different time points                                            | 50                  |
|                              |                     |     | Dissolution, disintegration and drug release failure                                                                | 45                  |
|                              |                     |     | Others                                                                                                              | 47                  |
| Contamination                | 139                 | 21  | Impurities                                                                                                          | 82                  |
|                              |                     |     | Lack of sterility assurance                                                                                         | 35                  |
|                              |                     |     | Microbial contamination                                                                                             | 22                  |
| Minor packaging defects      | 71                  | 11  | Fault involving the external packaging or minor printing errors that do not involve name or strength of a medicines | 60                  |
|                              |                     |     | Missing or incorrect product registration number, batch number, manufacturer's name or expiry date                  | 11                  |
| Major packaging defects      | 65                  | 10  | Missing or incorrect name ,strength, or active ingredient of a medicine on carton or box                            | 35                  |
|                              |                     |     | Packing a medicine in the wrong carton or present of a foreign tablet or capsule in the bottle or blister           | 30                  |
| Defects in active ingredient | 62                  | 10  | Excessive amount of active ingredients                                                                              | 26                  |
|                              |                     |     | Inadequate amount of active ingredient                                                                              | 20                  |
|                              |                     |     | Active ingredient is out of specification                                                                           | 16                  |
| Delivery defects             | 35                  | 5   | Fault with a device                                                                                                 | 22                  |
|                              |                     |     | Leakage or loose/ tight seal ,cracks in a vial or broken tablets                                                    | 9                   |
|                              |                     |     | Others                                                                                                              | 4                   |
| Other defects                | 72                  | 11  | GMP deficiencies and deviation from preapproved specifications                                                      | 48                  |
|                              |                     |     | Inappropriate shipment                                                                                              | 14                  |
|                              |                     |     | Dissolution / disintegration failure                                                                                | 10                  |
| Total                        | 649                 | 100 |                                                                                                                     | 649                 |

**Table 2: Contaminated medicines subjected to urgent recalls (Health Product Recall type I).**

| Medications (number of incidents)                                                                                                | Formulation            | Defect description                                                                                                                  |
|----------------------------------------------------------------------------------------------------------------------------------|------------------------|-------------------------------------------------------------------------------------------------------------------------------------|
| Marcaine (2), acyclovir (1), nitroglycerin (1), magnesium sulfate (1), dexamethasone sodium (1), vistide (1) and carboplatin (1) | Solution for injection | Visible particulates were identified in the formulation (such as white, metallic or glass particles.)                               |
| Propofol (4) and fat emulsion (1)                                                                                                | Emulsion for injection |                                                                                                                                     |
| Extraneal (1) ciprofloxacin (1), carmustine (1), technetium Tc 99m (1) and liposomal amphotericin B (1)                          | Solution for injection | Microbial contamination (bacterial, fungal or viral contamination)                                                                  |
| Docusate sodium (1)                                                                                                              | Capsules               |                                                                                                                                     |
| Sucrose (1)                                                                                                                      | Oral liquid            |                                                                                                                                     |
| Benzalkonium chloride (1)                                                                                                        | Topical Liquid         |                                                                                                                                     |
| Sodium Chloride (1) and dextrose (1)                                                                                             | Solution for injection | Integrity of the foil seal is compromised leading to potential contamination of the vial adapter                                    |
| Diameal (1), DTE technetium Tc 99m (1), electrolyte infusion (1) and dextrose (1)                                                | Solution for injection | Lack of sterility assurance at the time of manufacture                                                                              |
| Gen Teal Artificial Tears (1)                                                                                                    | Ophthalmic Solution    |                                                                                                                                     |
| Heparin sodium (3)                                                                                                               | Solution for injection | Contamination with heparin-like contaminant                                                                                         |
| Quetiapine (3)                                                                                                                   | Tablets                | cross-contamination of trace amounts of clindamycin in quetiapine active pharmaceutical ingredient during the manufacturing process |

**Note:** All medicines were reported using health Product Recall Type I document

**Table 3: Substandard medicines subjected to urgent recalls (Health Product Recall type I and PW) with other defect types**

| Type of defect                                          | Medications (number of incidents)                                                                                                  | Formulation                                                                                           | Defect description                                                                                                                                                                                                                                                                                                                                                                                                                   |
|---------------------------------------------------------|------------------------------------------------------------------------------------------------------------------------------------|-------------------------------------------------------------------------------------------------------|--------------------------------------------------------------------------------------------------------------------------------------------------------------------------------------------------------------------------------------------------------------------------------------------------------------------------------------------------------------------------------------------------------------------------------------|
| <b>Major packaging defects</b><br>(incorrect labelling) | Trazodone (1), amlodipine (1) and fluvoxamine (1)                                                                                  | Tablets                                                                                               | Some products contained the wrong medicines due to labelling errors (e.g., amlodipine instead of minocycline, minocycline instead of amlodipine, clonazepam instead of rifampicin and fluphenazine instead of Octreotide) or filling errors (e.g., nabilone instead of trazodone, ciprofloxacin instead of fluvoxamine, trazodone instead of nabilone, Isoproterenol instead of morphine and blue collyrium instead of prednisolone) |
|                                                         | Nabilone (1), minocycline (1) and rifampicin (1)                                                                                   | Capsules                                                                                              |                                                                                                                                                                                                                                                                                                                                                                                                                                      |
|                                                         | Morphine sulphate (1) and octreotide acetate omega (1)                                                                             | Solution for injection                                                                                |                                                                                                                                                                                                                                                                                                                                                                                                                                      |
|                                                         | Prednisolone (1)*                                                                                                                  | Ophthalmic solution                                                                                   |                                                                                                                                                                                                                                                                                                                                                                                                                                      |
|                                                         | Hemodialysis acid concentrates (1), remifentanil HCl (1), pamidronate disodium (1), tobramycin (1) and triamcinolone acetonide (1) | Solution for injection                                                                                | Wrong strength , dosage or expiry date were printed on the packaging                                                                                                                                                                                                                                                                                                                                                                 |
|                                                         | Sodium solysterene sulfonate (1)                                                                                                   | Suspension                                                                                            |                                                                                                                                                                                                                                                                                                                                                                                                                                      |
|                                                         | Acetaminophen (1)                                                                                                                  | Suppositories                                                                                         |                                                                                                                                                                                                                                                                                                                                                                                                                                      |
|                                                         | Personnelle cold and flu tablets (2), acetylsalicylic acid (1), acetaminophen (1) and Personelle acid control (1)                  | Tablets                                                                                               | Important mandatory warning statement was missed on the external packaging                                                                                                                                                                                                                                                                                                                                                           |
|                                                         | Oral contraceptive pills (4)                                                                                                       | Tablets                                                                                               | Additional placebo tablet was found in place of an active tablet in one blister pack raising the risk of unwanted pregnancy                                                                                                                                                                                                                                                                                                          |
| Ibuprofen (2)                                           | Tablets                                                                                                                            | The label stated that the bottle had a child resistant cap, but the cap used was not child resistant. |                                                                                                                                                                                                                                                                                                                                                                                                                                      |
| <b>Stability defects</b>                                | Smallpox vaccine (1)                                                                                                               | Solution for injection                                                                                | Evidence of instability based on its appearance.                                                                                                                                                                                                                                                                                                                                                                                     |
|                                                         | Timolol (1)                                                                                                                        | Ophthalmic Solution                                                                                   | Active ingredient was out of specification after 12 month of production date                                                                                                                                                                                                                                                                                                                                                         |
|                                                         | Valproic acid (1)                                                                                                                  | Capsules                                                                                              | Disintegration test failure within the shelf life of the drug                                                                                                                                                                                                                                                                                                                                                                        |
|                                                         | Amoxicillin (1)                                                                                                                    | Suspension                                                                                            | Out of specification assay result was obtained at various time points.                                                                                                                                                                                                                                                                                                                                                               |
| <b>Active ingredients defects</b>                       | Phenobarbital (1)* and morphine SR (1)                                                                                             | Tablets                                                                                               | Oversized tablets were found raising the risk of overdose                                                                                                                                                                                                                                                                                                                                                                            |
|                                                         | Acetylsalicylic acid (1)                                                                                                           |                                                                                                       | Inadequate amount of active ingredient                                                                                                                                                                                                                                                                                                                                                                                               |
|                                                         | Delflex (1) and carmustine (1)                                                                                                     | Solution for injection                                                                                | Excessive amount of active ingredients                                                                                                                                                                                                                                                                                                                                                                                               |
|                                                         | Ethacrynic acid (1)                                                                                                                |                                                                                                       | Inadequate amount of active ingredient                                                                                                                                                                                                                                                                                                                                                                                               |
| <b>Delivery defects</b>                                 | Paliperidone palmitate (1), nutrinal (1), degarelix (1), caspofungin acetate (1), vancomycin (1) and argatroban (1)                | Solution for injection                                                                                | Cracks in the syringes or vials , or leaks from the bags were identified raising the risk of contamination                                                                                                                                                                                                                                                                                                                           |
|                                                         | Sumatriptan (1)                                                                                                                    |                                                                                                       | Pre-filled syringes were filled with needles that protruded through the needle shield                                                                                                                                                                                                                                                                                                                                                |
|                                                         | Morphine sulphate (1)                                                                                                              |                                                                                                       | Plunger friction with the vial may cause pump occlusion or delivery of inaccurate dose                                                                                                                                                                                                                                                                                                                                               |
|                                                         | Cough and Cold syrup (9)                                                                                                           | Syrup                                                                                                 | The child-resistant feature of the bottle cap was not functioning properly                                                                                                                                                                                                                                                                                                                                                           |
| <b>Other</b>                                            | Hypromellose (1)                                                                                                                   | lubricant eye gel                                                                                     | Non-compliance with Good manufacturing practices                                                                                                                                                                                                                                                                                                                                                                                     |

\*Medicine was reported using the Public Warning document. Others were reported using Health Product Recall type I

**Table 4: Substandard medicines categorised by the type of the Marketing Authorisation Holders**

| Type of quality defect | Medicines marketed by manufacturers<br>(n= 122) | Medicines marketed by distributors<br>(n= 26) | P-Value* |
|------------------------|-------------------------------------------------|-----------------------------------------------|----------|
|                        | Number of medicines, (%)                        | Number of medicines, (%)                      |          |
| Stability              | 191 (31)                                        | 14 (37)                                       | 0.476    |
| Contamination          | 134 (22)                                        | 5 (13)                                        | 0.228    |
| Minor packaging        | 69 (11)                                         | 2 (5)                                         | 0.417    |
| Major packaging        | 60 (10)                                         | 5 (13)                                        | 0.573    |
| Active ingredient      | 59 (10)                                         | 3 (8)                                         | 1.000    |
| Delivery               | 34 (5)                                          | 1 (3)                                         | 0.714    |
| Others                 | 64 (11)                                         | 8 (21)                                        | 0.058    |
| <b>Total</b>           | <b>611 (100)</b>                                | <b>38 (100)</b>                               |          |

\*A significant difference was defined at a p value <0.05.

### Figure legends:

Figure 1: Flow diagram of search and resulting incidents.

Figure 2: Number of incidents of defective medicines reported by Health Canada.

Figure 3: Comparison between Canada and the UK in the types of substandard medicines.

1  
2  
3  
4  
5  
6  
7  
8  
9  
10  
11  
12  
13  
14  
15  
16  
17  
18  
19  
20  
21  
22  
23  
24  
25  
26  
27  
28  
29  
30  
31  
32  
33  
34  
35  
36  
37  
38  
39  
40  
41  
42  
43  
44  
45  
46  
47  
48  
49  
50  
51  
52  
53  
54  
55  
56  
57  
58  
59  
60

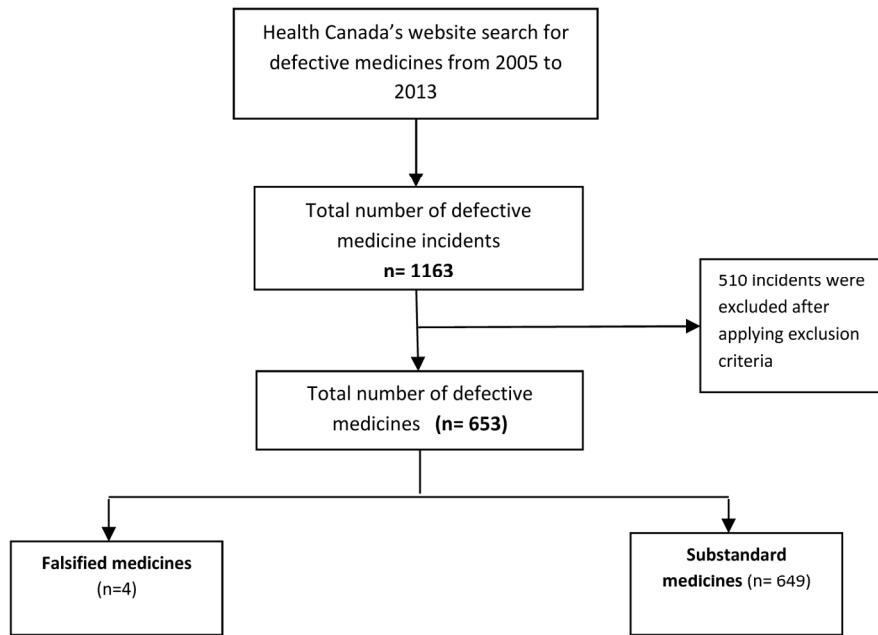

Figure 1: Flow diagram of search and resulting incidents.  
148x103mm (300 x 300 DPI)

view only

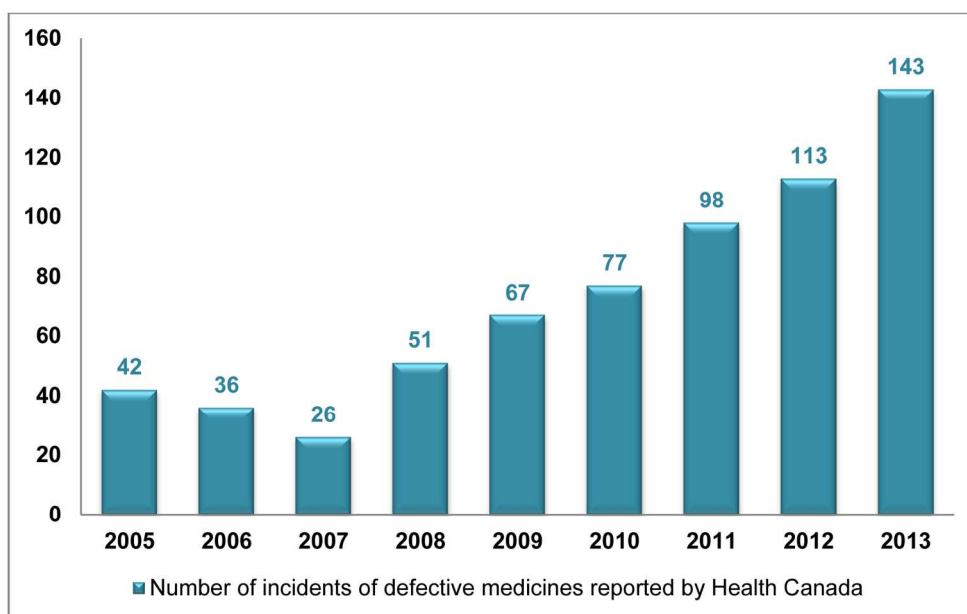

Figure 2: Number of incidents of defective medicines reported by Health Canada.  
155x97mm (300 x 300 DPI)



1  
2  
3  
4  
5  
6  
7  
8  
9  
10  
11  
12  
13  
14  
15  
16  
17  
18  
19  
20  
21  
22  
23  
24  
25  
26  
27  
28  
29  
30  
31  
32  
33  
34  
35  
36  
37  
38  
39  
40  
41  
42  
43  
44  
45  
46  
47  
48  
49  
50  
51  
52  
53  
54  
55  
56  
57  
58  
59  
60

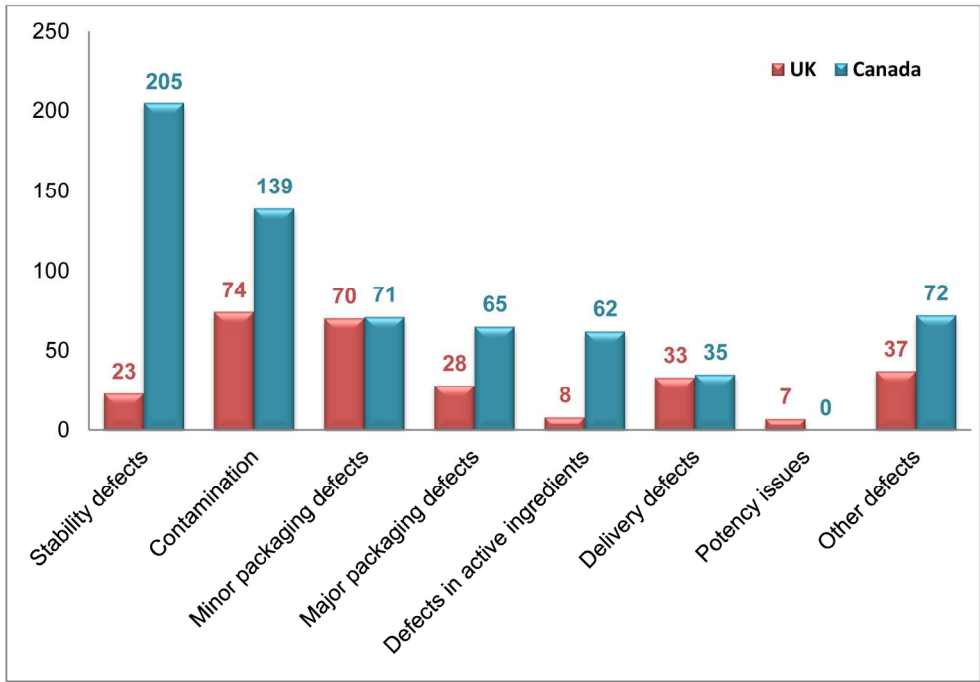

Figure 3: Comparison between Canada and the UK in the types of substandard medicines. 157x109mm (300 x 300 DPI)

view only

**Supplementary data:****Table 1: Number of formulations under each defect type of substandard medicines**

| Defect Type                 | Formulation type     | Number of formulations |
|-----------------------------|----------------------|------------------------|
| Stability defect            | Tablets              | 89                     |
|                             | Parenteral           | 46                     |
|                             | Topical preparations | 34                     |
|                             | Capsules             | 24                     |
|                             | Liquid preparations  | 12                     |
| Contamination               | Parenteral           | 71                     |
|                             | Tablets              | 29                     |
|                             | Topical preparations | 21                     |
|                             | Liquid preparations  | 11                     |
|                             | Capsules             | 7                      |
| Minor packaging defect      | Tablets              | 39                     |
|                             | Parenteral           | 14                     |
|                             | Capsules             | 9                      |
|                             | Liquid preparations  | 5                      |
|                             | Topical preparations | 4                      |
| Major packaging defects     | Tablets              | 35                     |
|                             | Parenteral           | 13                     |
|                             | Capsules             | 11                     |
|                             | Topical preparations | 6                      |
| Defect in active ingredient | Tablets              | 18                     |
|                             | Topical preparations | 16                     |
|                             | Parenteral           | 13                     |
|                             | Liquid preparations  | 8                      |
|                             | Capsules             | 6                      |
| Delivery defect             | Parenteral           | 11                     |
|                             | Liquid preparations  | 10                     |
|                             | Topical preparations | 8                      |
|                             | Tablets              | 6                      |
|                             | Capsules             | 1                      |
| Other defects               | Tablets              | 35                     |
|                             | Parenteral           | 20                     |
|                             | Topical preparations | 11                     |
|                             | Liquid preparations  | 3                      |
|                             | Capsules             | 3                      |
| Total                       |                      | 649                    |

**Table 2: Substandard medicines subjected to semi-urgent communications  
(Health Product Recall - Types II and II, PA, HPC-NtoH and HPC-DHCPL)**

| Type of defect               | Health Product Recalls - type II | Health Product Recalls - type II | PA       | HPC-NtoH | HPC-DHCPL | Type of drug recall was not stated |
|------------------------------|----------------------------------|----------------------------------|----------|----------|-----------|------------------------------------|
| Stability defects            | 90                               | 107                              | 0        | 0        | 1         | 0                                  |
| Contamination                | 68                               | 25                               | 1        | 6        | 2         | 0                                  |
| Minor packaging defects      | 22                               | 47                               | 0        | 2        | 0         | 0                                  |
| Defects in active ingredient | 33                               | 22                               | 0        | 0        | 1         | 1                                  |
| Major packaging defects      | 23                               | 12                               | 1        | 1        | 0         | 1                                  |
| Delivery defects             | 10                               | 6                                | 5        | 0        | 2         | 0                                  |
| Other issues                 | 42                               | 26                               | 1        | 0        | 1         | 1                                  |
| <b>Total</b>                 | <b>288</b>                       | <b>245</b>                       | <b>8</b> | <b>9</b> | <b>7</b>  | <b>3</b>                           |

**PA:** Public Advisory; **HPC-DHCPL:** Healthcare Professional Communication - Dear Health Care Professional Letter; **HPC-NtoH:** Healthcare Professional Communication - Notice to Hospitals

**Table 3: Substandard medicines reported by Health Canada, classified according to the organ or system in which they act and according to the therapeutic subgroup they belong (Classification ATC) 2005-2013:**

| Category                                                            | No. | %    | Category                                                                                                                                                            | No.                                 | %                                             |
|---------------------------------------------------------------------|-----|------|---------------------------------------------------------------------------------------------------------------------------------------------------------------------|-------------------------------------|-----------------------------------------------|
| According to organ or system in which the drug acts                 |     |      | According to subgroup, therapeutic main group                                                                                                                       |                                     |                                               |
| Nervous system                                                      | 141 | 21.7 | Analgesics<br>Psycholeptics<br>Psychoanaleptics<br>Anaesthetics<br>Antiepileptics<br>Anti-parkinson drugs                                                           | 65<br>26<br>18<br>15<br>13<br>4     | 10.0<br>4.0<br>2.8<br>2.3<br>2.0<br>0.6       |
| Alimentary tract and metabolism                                     | 90  | 13.9 | Drugs for acid related disorders<br>Vitamins<br>Mineral supplements<br>Laxatives<br>Drugs used in diabetes<br>Drugs for constipation<br>Stomatological preparations | 25<br>22<br>16<br>12<br>9<br>3<br>3 | 3.9<br>3.4<br>2.5<br>1.8<br>1.4<br>0.5<br>0.5 |
| Cardiovascular System                                               | 83  | 12.8 | Antihypertensives<br>Lipid modifying agents<br>Cardiac therapy                                                                                                      | 50<br>24<br>9                       | 7.7<br>3.7<br>1.4                             |
| Anti-infectives for systemic use                                    | 65  | 10.0 | Antibacterials for systemic use<br>Antimycotics for systemic use<br>Immune sera and immunoglobulins<br>Vaccines<br>Antivirals for systemic use                      | 38<br>8<br>8<br>6<br>5              | 5.9<br>1.2<br>1.2<br>0.9<br>0.8               |
| Blood and blood forming organs                                      | 63  | 9.7  | Blood substitutes and perfusion solutions<br>Antithrombotic agents<br>Antianemic preparations                                                                       | 30<br>19<br>14                      | 4.6<br>2.9<br>2.2                             |
| Dermatologicals                                                     | 46  | 7.1  | Corticosteroids, dermatological preparations<br>Other dermatological preparations<br>Anti-acne preparations<br>Antifungals for dermatological use                   | 18<br>14<br>9<br>5                  | 2.8<br>2.2<br>1.4<br>0.8                      |
| Respiratory system                                                  | 31  | 4.8  | Antihistamines for systemic use<br>Cough and cold preparations<br>Drugs for obstructive airway diseases<br>Nasal preparations                                       | 11<br>11<br>7<br>2                  | 1.7<br>1.7<br>1.1<br>0.3                      |
| Genito-urinary system and sex hormones                              | 29  | 4.5  | Sex hormones and modulators of the genital system<br>Urologicals<br>Gynecological antiinfectives and antiseptics                                                    | 22<br>5<br>2                        | 3.4<br>0.8<br>0.3                             |
| Antineoplastic and immunomodulating agents                          | 28  | 4.3  | Antineoplastic agents<br>Immunosuppressants<br>Immunostimulants<br>Endocrine therapy                                                                                | 18<br>4<br>4<br>2                   | 2.8<br>0.6<br>0.6<br>0.3                      |
| Various                                                             | 26  | 4.0  | Diagnostic radiopharmaceuticals<br>All other therapeutic products<br>Contrast media                                                                                 | 20<br>4<br>2                        | 3.1<br>0.6<br>0.3                             |
| Sensory organs                                                      | 21  | 3.2  | Ophthalmologicals<br>Otologicals                                                                                                                                    | 20<br>1                             | 3.1<br>0.2                                    |
| Musculo-skeletal system                                             | 18  | 2.8  | Antiinflammatory and antirheumatic products<br>Drugs for treatment of bone diseases<br>Muscle relaxants                                                             | 11<br>6<br>1                        | 1.7<br>0.9<br>0.2                             |
| Systemic hormonal preparations, excluding sex hormones and insulins | 8   | 1.2  | Pituitary and hypothalamic hormones and analogues<br>Pancreatic hormones<br>Pituitary and hypothalamic hormones and analogues                                       | 3<br>3<br>2                         | 0.5<br>0.5<br>0.3                             |
| Total                                                               | 649 | 100  | Total                                                                                                                                                               | 649                                 | 100                                           |

**Table 4: Substandard medicines categorised by manufacturers and type of defects**

| Manufacturer*                        | Number of medicines under each type of quality defect |               |                 |                   |                 |          |        | Total      | Total number of medicines marketed by each manufacturer in Canada |
|--------------------------------------|-------------------------------------------------------|---------------|-----------------|-------------------|-----------------|----------|--------|------------|-------------------------------------------------------------------|
|                                      | Stability                                             | Contamination | Minor packaging | Active ingredient | Major packaging | Delivery | Others |            |                                                                   |
| Apotex Inc.                          | 31                                                    | 13            | 4               | 2                 | 2               | 2        | 3      | 57         | 220                                                               |
| Teva Canada Ltd.                     | 15                                                    | 11            | 5               | 7                 | 10              | 2        | 3      | 53         | 224                                                               |
| Pharmascience Inc.                   | 12                                                    | 3             | 3               | 6                 | 6               | 2        | 3      | 35         | 173                                                               |
| Vita Health Products Inc.            | 4                                                     | 0             | 14              | 4                 | 10              | 1        | 0      | 33         | NA                                                                |
| Sandoz Canada Inc.                   | 5                                                     | 8             | 1               | 12                | 5               | 0        | 0      | 31         | 232                                                               |
| Hospira Healthcare Co.               | 1                                                     | 13            | 0               | 0                 | 0               | 3        | 9      | 26         | 94                                                                |
| Novartis Pharmaceuticals Canada Inc. | 4                                                     | 2             | 1               | 1                 | 1               | 13       | 1      | 23         | 114                                                               |
| Pfizer Canada Inc.                   | 10                                                    | 2             | 4               | 1                 | 1               | 1        | 1      | 20         | 120                                                               |
| GlaxoSmithKline Inc.                 | 3                                                     | 8             | 2               | 6                 | 0               | 1        | 0      | 20         | 77                                                                |
| Baxter Co.                           | 2                                                     | 8             | 4               | 0                 | 1               | 1        | 0      | 16         | 58                                                                |
| Sanofi-Aventis Canada Inc.           | 4                                                     | 1             | 2               | 5                 | 0               | 0        | 4      | 16         | 76                                                                |
| Laboratoire Riva Inc                 | 11                                                    | 1             | 0               | 0                 | 0               | 0        | 1      | 13         | NA                                                                |
| Pro-Doc Ltd.                         | 5                                                     | 3             | 0               | 0                 | 1               | 0        | 3      | 12         | 158                                                               |
| Mylan pharmaceuticals                | 0                                                     | 0             | 2               | 1                 | 4               | 1        | 3      | 11         | 145                                                               |
| Pharmetics Inc.                      | 1                                                     | 3             | 0               | 0                 | 0               | 0        | 2      | 10         | NA                                                                |
| JAMP Pharma Co.                      | 4                                                     | 1             | 1               | 3                 | 0               | 0        | 1      | 10         | 37                                                                |
| Pharmaceutical Partners of Canada.   | 2                                                     | 3             | 0               | 0                 | 1               | 1        | 2      | 9          | 40                                                                |
| Schering-Plough Canada Inc.          | 3                                                     | 1             | 2               | 0                 | 0               | 0        | 2      | 8          | 72                                                                |
| McNeil Consumer Products Co.         | 0                                                     | 2             | 1               | 0                 | 0               | 0        | 5      | 8          | 28                                                                |
| Taro Pharmaceuticals Inc.            | 3                                                     | 3             | 0               | 0                 | 0               | 0        | 1      | 7          | 21                                                                |
|                                      |                                                       |               |                 |                   |                 |          |        | <b>418</b> |                                                                   |

\*Only the top 20 manufacturers are listed.

# BMJ Open

## Quality of medicines in Canada: a retrospective review of risk communication documents (2005–2013)

|                                 |                                                                                                                                                                                                                        |
|---------------------------------|------------------------------------------------------------------------------------------------------------------------------------------------------------------------------------------------------------------------|
| Journal:                        | <i>BMJ Open</i>                                                                                                                                                                                                        |
| Manuscript ID:                  | bmjopen-2014-006088.R2                                                                                                                                                                                                 |
| Article Type:                   | Research                                                                                                                                                                                                               |
| Date Submitted by the Author:   | 06-Oct-2014                                                                                                                                                                                                            |
| Complete List of Authors:       | Almuzaini, Tariq; University of Nottingham, Academic Division of Child Health<br>Sammons, Helen; University of Nottingham, Child Health<br>Choonara, Imti; University of Nottingham, Academic Division of Child Health |
| <b>Primary Subject Heading</b>: | Public health                                                                                                                                                                                                          |
| Secondary Subject Heading:      | Health policy, Pharmacology and therapeutics                                                                                                                                                                           |
| Keywords:                       | Substandard medicines, Falsified medicines, Drug recalls                                                                                                                                                               |
|                                 |                                                                                                                                                                                                                        |

SCHOLARONE™  
Manuscripts

Peer Review Only

1  
2  
3 **Quality of medicines in Canada: a retrospective review of risk**  
4 **communication documents (2005–2013)**  
5  
6  
7

8 Tariq Almuzaini<sup>1</sup>, Helen Sammons<sup>1</sup>, Imti Choonara<sup>1</sup>  
9

10  
11 (1) Academic Division of Child Health, University of Nottingham, Derbyshire  
12 Children's Hospital, Derby, UK  
13

14  
15  
16 **Corresponding author**  
17

18 Tariq Almuzaini  
19

20 Academic Division of Child Health  
21

22 The Medical School  
23

24 University of Nottingham  
25

26 Derbyshire Children's Hospital  
27

28 Uttoxeter Road  
29

30 Derby DE22 3DT  
31

32 UK  
33

34  
35 Email: [mzxta@exmail.nottingham.ac.uk](mailto:mzxta@exmail.nottingham.ac.uk)  
36  
37

38  
39 **Abstract:** 252 words  
40

41 **Full text:** 3589 words  
42

43 **Number of figures:** 3  
44

45 **Number of tables:** 4  
46  
47

48  
49 **Keywords:** Falsified, substandard, defective, medicines, recalls  
50  
51  
52  
53  
54  
55  
56  
57  
58  
59  
60

## ABSTRACT

**Objective:** To explore the quality and safety of medicines in Canada.

**Design:** A retrospective review of drug recalls and risk communication documents conveying issues relating to defective (i.e., substandard and falsified) medicines.

**Setting:** The Health Canada website search for drug recalls and risk communication documents issued between 2005 and 2013.

**Eligibility criteria:** Drug recalls and risk communication documents related to quality defect in medicinal products.

**Main outcome measure:** Relevant data about defective medicines reported in drug recalls and risk communication documents, including description of the defect, type of formulation, year of the recall and category of the recall or the document.

**Results:** There were 653 defective medicines of which 649 were substandard. The number of defective medicines reported by Health Canada increased from 42 in 2005 to 143 in 2013. The two most frequently reported types of defects were stability (205 incidents) and contamination issues (139 incidents). Some of these defects were found to be more prominent and repetitive over other types within some manufacturers. Tablet formulation (251 incidents) was the formulation most frequently compromised. No significant differences were observed between the manufacturers and distributors in the number of substandard medicines reported under each defect type. There were only four falsified medicines reported over the nine-year period.

**Conclusions:** Substandard medicines are a problem in Canada and have resulted in an increasing number of recalled medicines. Most of the failures were related to stability issues, raising the need to investigate the root causes and for stringent preventative measures to be implemented by manufacturers.



## Strengths and limitations of this study

- It is the first review to assess the problem of defective medicines in Canada.
- It quantifies and analyses drug recalls in Canada over a 9- year period.
- Clinical significance of the problem is undetermined, owing to the lack of data from Health Canada regarding adverse events associated with the use of defective medicines.

## INTRODUCTION

Defective medicines are a major public health problem<sup>1-4</sup> Different surveys in lower income countries (LIC) and lower-middle-income countries (LMIC) have found that defective medicines are readily available.<sup>3, 5</sup>

Defective medicine is a term used to describe any drug with a quality defect, whether the error was due to deliberate falsification or unintentional error during manufacturing.<sup>6, 7</sup> It is a large category that comprises two main types of compromised drugs, substandard and falsified medicines. A substandard medicine is a medicine that does not meet the regulator standards due to an unintentional or negligent error.<sup>8</sup> A falsified medicine, however, is one where deliberate and criminal intent is involved.<sup>8</sup>

In high income countries (HIC), there have been no studies with good methodological quality examining the overall prevalence of substandard or falsified medicines.<sup>3</sup> The surveillance system in HIC in Europe and North America, however, is a well-established system that has identified and withdrawn several medicines from the market with serious safety concerns.<sup>9, 10</sup> These surveillance systems have reported numerous incidents of substandard and falsified medicines, and highlighted the problem of such drugs in these countries. Examples of these are the falsified cancer drug, Avastin, and substandard spinal steroid injections reported in the USA.<sup>11, 12</sup> In our previous study on the UK, we studied the problem of defective medicines in the UK by reviewing the drug alerts issued by the drug regulator over an 11-year period. The study showed that substandard medicines are a problem that appears to be increasing.<sup>7</sup> We wished to explore another HIC and chose Canada, as the problem of

1  
2  
3 defective medicines has never been explored in this setting and because of the level of  
4 data available in the public domain.  
5  
6

7 In Canada, Health products are regulated by Health Canada, which is the federal  
8 department responsible for the monitoring and regulating of medicines.<sup>13</sup> It issues a  
9 number of risk communication documents to the public and healthcare professionals.  
10 These involve identification of the possible risk, assessment of its severity and  
11 clarification of the nature of the problem. This communication is also initiated to  
12 disseminate information regarding new safety issues of medicines or existing health  
13 risks to allow healthcare professionals and their patients to make well-informed  
14 decisions about their health.<sup>14</sup>  
15  
16  
17  
18  
19

20  
21 The aim of this study was to explore the quality and safety of medicines in Canada by  
22 analysing the risk communication documents conveying issues relating to defective  
23 medicines.  
24  
25  
26  
27  
28

## 29 **METHODS**

30  
31 Health Canada uses 13 risk communication documents, which can be issued for the  
32 public, healthcare professionals, and hospitals.<sup>14</sup> A preliminary search for these risk  
33 communication documents found that only five documents can be used by Health  
34 Canada to convey any defective health product issue in the Canadian official supply  
35 chain. These can be described as follows:  
36  
37  
38  
39

- 40 • **Public Warning (PW):** issued by Health Canada if the use of the drug can  
41 cause a severe adverse health consequence that may lead to death.  
42
- 43 • **Public Advisory (PA):** issued by Health Canada if exposure to or the use of  
44 the drug can cause adverse health consequences, but is not life threatening  
45 or serious.  
46
- 47 • **Healthcare Professional Communication - Notice to Hospitals (HPC-  
48 NtoH):** to inform the healthcare professional about time-sensitive issues  
49 concerning safety and/or efficacy of medicinal products. It is intended for  
50 hospital use only.  
51  
52  
53  
54  
55  
56  
57  
58  
59  
60

- 1
- 2
- 3
- 4
- 5
- 6
- 7
- 8
- 9
- 10
- 11
- 12
- 13
- 14
- 15
- 16
- 17
- 18
- 19
- 20
- 21
- 22
- 23
- 24
- 25
- 26
- 27
- 28
- 29
- 30
- 31
- 32
- 33
- 34
- 35
- 36
- 37
- 38
- 39
- 40
- 41
- 42
- 43
- 44
- 45
- 46
- 47
- 48
- 49
- 50
- 51
- 52
- 53
- 54
- 55
- 56
- 57
- 58
- 59
- 60
- **Healthcare Professional Communication - Dear Health Care Professional Letter (HPC-DHCPL):** to inform the healthcare professional about issues regarding safety and/or efficacy of medicinal products.
- **Health Product Recall (with type I, II or III):** These can be classified according to the urgency of the recall as follows:
  - Health Product Recall type I: issued if the health product can cause severe adverse health consequence that may lead to death.
  - Health Product Recall type II: issued if the exposure to or the use of the health product can cause adverse health consequences but is not life threatening or serious.
  - Health Product Recall type III: The exposure to or use of the health product is not likely to cause any harm but the recall is initiated for other reasons such as minor deviation from specifications.

Both PW and Health Product Recall type I are considered by Health Canada to be urgent communications, as they are issued for a medicine which may pose a serious health risk. PA, HPC-NtoH, HPC-DHCPL and type II and III Health Product Recalls are semi-urgent communications where the risk associated with the use of a medicine is not serious.<sup>14</sup>

A search for risk communication documents conveying issues relating to defective medicines (i.e., substandard and falsified medicines) was carried out. This was performed through the official Health Canada's website and using the search engine allocated for advisories, warnings, and recalls of health products (<http://www.hc-sc.gc.ca/dhp-mpps/medeff/advisories-avis/index-eng.php>). Health Canada started posting Health Product Recalls on its website in 2005. These recalls are the main tool that Health Canada uses to convey quality issues with medicines. Before that, there were only two types of risk communication documents (PA and HPC-DHCPL) available on Health Canada's website. We wanted to examine the same documents throughout the years. Therefore, the search was started from 2005, and all risk communication documents issued between 1 January 2005 and 31 December 2013 were included. All risk communication documents (PW, PA, HPC-DHCPL, HPC-NtoH and Health Product Recalls) were reviewed and the relevant information was then extracted.

1  
2  
3 All relevant information regarding defective health products was compiled and  
4 exclusion criteria were as follows: veterinary medicines; medicines lacking efficacy or  
5 acquiring general safety issues; herbal and probiotic products; dietary and cosmetic  
6 products; and other natural health product recalled for regulatory reason (i.e., those  
7 do not have a valid marketing authorisation). The following data were extracted from  
8 the risk communication documents: name, strength, and dosage form; year of the  
9 document; nature of the defect; type of drug recall (in the case of Health Product  
10 Recalls); and action to be taken by healthcare professionals or the public regarding  
11 the defective medicine. In the case of Health Product Recalls and PW, the action is  
12 to remove the defective medicine from the dispensary shelves and contact the  
13 manufacturer for return. Whereas, with other risk communication documents where  
14 there is no recall required, healthcare professionals and the public are given advice  
15 on how to deal with defective medicines and to alert the public to be aware of  
16 expected risks. Two types of drugs can be distinguished from risk communication  
17 documents; substandard drugs and falsified drugs. The decision on which incident  
18 was falsified or substandard is that published by Health Canada.  
19  
20  
21  
22  
23  
24  
25  
26  
27  
28  
29

30 The type of defects were then classified using the same classification as used in our  
31 previous study.<sup>7</sup> The quality defects were classified as contamination, minor or major  
32 packaging defect, delivery (e.g., leaking bags) defect, stability failure, potency  
33 issues, active ingredient defect and other issues (such as other deviations  
34 concerning non-compliance with good manufacturing practice at manufacturing site).  
35  
36  
37  
38

39 The WHO Organization Anatomical Therapeutic Chemical (ATC) Classification  
40 System was used to classify defective medicines.<sup>15</sup> The first level of this classification  
41 categorises medicines according to the organ or system in which they act and the  
42 second level classifies medicines according to their main therapeutic group. This  
43 was performed to highlight the most frequent therapeutic classes affected by these  
44 recalls.  
45  
46  
47  
48  
49

### 50 **Method of analysis**

51

52 Minitab (version 16) software was used to store and analyse the data. Descriptive  
53 statistics were used to summarise the results. Marketing authorisation holders of  
54 recalled medicines were either licensed manufacturers or distributors. A comparison  
55 between the manufacturers and distributors in the number of substandard medicines  
56  
57  
58  
59  
60

1  
2  
3 reported under each type of quality defect was carried out using Fisher's exact test.  
4 A significant difference was defined at a p value <0.05. The comparison was  
5 conducted to investigate if there are certain types of quality defects (e.g., stability or  
6 packaging issues) that were more likely to be reported with distributors, as this may  
7 indicate non-compliance with Good Distribution Practices.  
8  
9  
10

## 11 **RESULTS**

12  
13 A total of 653 defective medicines were identified in the Canadian supply chain  
14 (Figure 1). Among these defective medicines, 649 were found to be substandard  
15 medicines, and only four were found to be falsified medicines in the nine years  
16 studied. The rate of reporting defective medicines has increased each year over the  
17 last six years (Figure 2).  
18  
19  
20  
21  
22

### 23 **Substandard medicines**

24  
25 Substandard medicines represent the bulk of defective medicines ( $n= 649$ , 99%)  
26 reported by Health Canada. The two most frequent types of defects reported were  
27 stability ( $n= 205$ , 32%) and contamination ( $n= 139$ , 21%) issues (Table 1). It is clear  
28 that substandard medicines with stability defects represent the largest group. The  
29 majority of these formulations were found to have degraded one year after their  
30 release into the market, resulting in low concentrations of active ingredients,  
31 impurities, dissolution and disintegration failures. Tablets were the formulation most  
32 frequently reported to be substandard (supplementary table 1).  
33  
34  
35  
36  
37  
38  
39

40 Among the 649 substandard medicines, 89 (14%) were subjected to urgent  
41 communications and therefore required urgent recalls. These medicines were  
42 reported using the Health Product Recall type 1 ( $n= 87$ ) and the PW ( $n=2$ ). More  
43 than half of these medicines ( $n= 46$ , 53%) were parenteral formulations (Tables 2  
44 and 3). Of the 89 medicines that were recalled, 34 were contaminated. The majority  
45 of these were parenteral formulations that were recalled due to the presence of  
46 particulate matters, the presence of microbes, or a lack of sterility assurance during  
47 their manufacture (Table 2). The remaining substandard medicines ( $n= 55$ ) were  
48 urgently recalled due to other types of defects (Table 3), mainly packaging defects or  
49 delivery issues (such as cracks in the vials or leaks in the bags, as well as faults in  
50 the unit used to deliver the medicines). Packaging defects were one of the major  
51  
52  
53  
54  
55  
56  
57  
58  
59  
60

1  
2  
3 clinical issues reported, and these included incorrect labelling (i.e., wrong drug  
4 name, strength, or expiry date) and packaging that lacked important information  
5 regarding safety or the use of medicines in the patient information leaflets. In some  
6 cases, the labelling was correct, but the wrong medicines were filled, resulting in  
7 major and urgent recalls of affected batches (Table 3).  
8  
9

10  
11  
12 Other substandard medicines ( $n= 560$ , 86%) were subjected to semi-urgent recalls  
13 ( $n= 536$ ) or caution in use ( $n= 24$ ). These were reported via the Health Product  
14 Recall type II ( $n= 288$  medicines, 44%) and III ( $n= 245$ , 38%), PA ( $n= 8$ , 1%), HPC-  
15 NtoH ( $n= 9$ , 1%) and HPC-DHCPL ( $n= 7$ , 1%). Three medicines were recalled, but  
16 the corresponding type of Health Product Recall was not given by Health Canada.  
17 The majority of these drugs had stability, contamination and packaging defects  
18 (supplementary table 2).  
19  
20

21  
22  
23  
24  
25  
26  
27  
28  
29  
30  
31  
32  
33  
34  
35  
36  
37  
38  
39  
40  
41  
42  
43  
44  
45  
46  
47  
48  
49  
50  
51  
52  
53  
54  
55  
56  
57  
58  
59  
60  
Drugs that act on the nervous system ( $n= 141$ , 22%), alimentary tract and  
metabolism ( $n= 90$ , 14%), and cardiovascular system ( $n= 83$ , 13%) were the  
subgroups that most frequently contained substandard medicines. When the second  
level of this classification (i.e., therapeutic classification) was used, the top three  
groups reported to be substandard were analgesics ( $n= 65$ , 10%), antihypertensives  
( $n= 50$ , 8%) and antibacterials ( $n= 38$ , 6%) (supplementary table 3).

### **Substandard medicines categorised by manufacturers**

The review identified 122 licensed manufacturers and 26 licensed distributors. Manufacturers held the marketing authorisation for 611 substandard medicines and distributors for 38 (Table 4). No unlicensed manufacturers or distributors were involved. A comparison between those manufacturers and distributors in the number of substandard medicines reported under each defect type and the  $p$  values for these differences is presented in Table 4. No significant differences were observed between manufacturers and distributors.

The top 20 manufacturers are listed in supplementary table 4. It was noted that 50% or more of substandard medicines manufactured by Apotex Inc., Pfizer Canada Inc. and Laboratoire Riva Inc. had stability issues. Almost half of the substandard products from Baxter Co., Hospira Healthcare Co. and GlaxoSmithKline Inc. were

1  
2  
3 contaminated. Products of Sandoz Canada Inc. had a problem with the active  
4 ingredient; the concentration was either too high or too low. More than half of  
5 Novartis products, which are reported to be substandard, were recalled due to  
6 delivery concerns, such as failure of the child-resistant feature of the bottle cap or  
7 leaks in the infusion bags.  
8  
9  
10

### 11 12 13 14 **Falsified medicines** 15

16  
17 Four incidents of falsified medicines were identified in Canada's supply chain  
18 between 2011 and 2013. All these incidents involved two sexual enhancement  
19 medicines, Viagra® (sildenafil) and Cialis® (tadalafil).  
20  
21

22  
23 In all cases of falsified medicines, Public Advisories were issued to inform the public  
24 to contact their healthcare professionals if they had concerns about these falsified  
25 medicines. The public was also advised to verify that these products were assessed  
26 by Health Canada for safety by looking at the authorisation number printed on the  
27 label. These medicines were seized in the retail outlets in Canada, and no further  
28 information was given by Health Canada about the subsequent investigation or  
29 action taken by Health Canada.  
30  
31  
32  
33  
34  
35  
36  
37

### 38 **DISCUSSION** 39

40 This is the first review that discusses the issue of substandard and falsified  
41 medicines in Canada by evaluating the risk communication documents and drug  
42 recalls posted on Health Canada website. Our observations of defective medicines  
43 recalls over nine consecutive years, from 2005 to 2013, have shown that the recall of  
44 substandard medicines is an increasing trend. It is concerning that over half of the  
45 stability failures were related to instability of active ingredients or dissolution and  
46 disintegration failure. Both defects have the potential to affect the bioavailability of  
47 the active ingredients in the systemic circulation, and in turn, may lead to therapeutic  
48 failure.  
49  
50  
51  
52  
53  
54  
55  
56  
57  
58  
59  
60



### Substandard medicines

The most frequent type of formulation reported to be substandard were tablets. Tablets have a slow onset of action and require less precaution in terms of sterility, than parenteral formulations. The extent of adverse consequences that can arise from failure to comply with manufacturing requirements, however, cannot be ignored. This was evident from the death of 120 patients in Pakistan due to contamination of isosorbide mononitrate tablets with large doses of an antimalarial drug.<sup>16</sup> Another of the most pronounced examples is the phenobarbital and morphine tablet recalls in Canada. Oversized tablets (i.e. tablets that exceed the weight requirement) were found in both drugs, raising the risk of the patients taking as much as double the strength stated on the bottle (Table 3). The Institute for Safe Medication Practices (ISMP), a non-profit organisation, stated that the US manufacturer (KV Pharmaceutical) received abnormally high reports of serious adverse events concerning overdose of these recalled tablets.<sup>17</sup> However, owing to the lack of sufficient details, it was impossible to link the overdose events specifically to the substandard tablets. The Adverse events relating to this defect have not been documented by Health Canada.

It was uncertain whether the rise of substandard medicines incidents were related to improved detection by Health Canada or due to an increase of substandard medicine production by manufacturers. The rate of increased incidence of substandard medicines could be associated with the implementation of improved detection policies and regulations by Health Canada. Introduction of Good Manufacturing Practices (GMP) inspection policy for Canadian drug establishments may be one of the explanations.<sup>18</sup> Since 1996, there have been numerous changes in GMP guidelines and international agreements. These led Health Canada to update its policy on GMP inspection in January 2008 as a response to harmonise its GMP compliance programme with drug regulatory authorities in other countries.<sup>18</sup> Subsequently, there has been a steady increase of incidents of substandard medicines from 2008 to 2013 (Figure 2). Similarly, it has been highlighted that most of the FDA recalls were related to FDA inspectors' visits in the USA.<sup>19</sup>

The GMP policy illustrates the procedures Health Canada follows to ensure that all drug establishments comply with GMP guidelines. This is conducted via inspections



1  
2  
3 with varying cycles according to a risk-based approach to assess complaints about  
4 medicines, and a ranking scale of priority.<sup>18</sup>This assessment is to ensure that these  
5 complaints are dealt with in a timely manner. The performance of Health Canada in  
6 using the risk-based approach, however, was criticised in the 2011 report of the Auditor  
7 General of Canada.<sup>20</sup> Based on a representative sample (50) of the files that Health  
8 Canada received in 2009 and 2010 concerning drug-related complaints, only 27 were  
9 dealt with according to the established risk-based standard operating procedures for  
10 prioritising reported complaints. The report concluded that Health Canada did not  
11 consistently apply its risk-based approach and therefore some of these complaints  
12 might not be processed in a timely manner proportional to their expected risk.<sup>20</sup>  
13 Therefore, the possibility that the increase in substandard medicines was a result of  
14 poor manufacturing practices cannot be excluded.  
15  
16  
17  
18  
19  
20  
21  
22  
23

### 24 **Manufacturing errors and investigation of the root cause**

25  
26 It is the responsibility of the manufacturers and marketing authorisation holders to recall  
27 their substandard products after consultation with Health Canada. The majority of these  
28 recalls were issued by the manufacturers or marketing authorisation holders using the  
29 Health Product Recall type I, II and III, which accounted for 95% of the total  
30 substandard medicines reported. Stability issues were mainly identified by the  
31 manufacturers during on-going stability testing. However, it is unknown whether these  
32 defects were identified by internal auditing systems of the manufacturers, by  
33 intervention of the Health Canada inspection team or by reports from healthcare  
34 professionals.  
35  
36  
37  
38  
39  
40  
41

42 Analysing pharmaceutical product recalls can be of great importance to identify the root  
43 causes of recalled medicines. The prompting of a drug recall can be regarded as a  
44 disastrous failure of the manufacturer's quality plan. Even with stringent quality  
45 measures, errors can occur.<sup>21, 22</sup> Thus, it is very important to identify the root cause of  
46 the defects to avoid similar episodes in the future. The root cause for a defect is  
47 required to be submitted to Health Canada, as soon as it is identified, along with other  
48 information relating to the quantity and depth of the distribution of the affected  
49 medicine. It is the responsibility of Health Canada to monitor the overall procedure and  
50 assess the root cause for this problem and, if required, to conduct an inspection to  
51 verify that a corrective action is implemented.<sup>23, 24</sup> It has been highlighted in this review  
52  
53  
54  
55  
56  
57  
58  
59  
60

1  
2  
3 that stability failure and contamination issues were the defect types being reported  
4 most frequently. These issues affected several manufacturers on more than one  
5 occasion (supplementary table 4). This highlights the need for root cause investigations  
6 and appropriate measures to be implemented by manufacturers as well as effective  
7 monitoring by Health Canada.  
8  
9

### 10 11 **Falsified medicines**

12  
13  
14 Only four incidents of falsified medicines were reported by Health Canada. The  
15 detection is extremely low compared with substandard medicine. Health Canada has  
16 robust GMP inspections that cover all drug establishments including manufacturers,  
17 distributors and wholesalers. The reporting system of Health Canada is concerned  
18 with falsified medicines detected within the scope of GMP inspections.<sup>18</sup> Some  
19 falsified medicines may be intercepted and seized by enforcement bodies on their  
20 way to target destinations, but not necessarily intended for the Canadian market.  
21 This may explain the low detection rate by Health Canada.  
22  
23  
24  
25  
26  
27

### 28 29 **Comparison with the UK**

30  
31 Despite the fact that Canada and the UK represent 2% (for each) of the global  
32 pharmaceutical market volume, they are two of the top markets by value of marketed  
33 medicines. Canada and the UK hold equal global pharmaceutical market share  
34 values of USD \$21,877 and USD \$21,635 billion, respectively.<sup>25</sup> They also use  
35 similar approaches in dealing with substandard medicines based on the expected  
36 risk. In the UK, the drug regulator uses four classes of drug alerts to communicate  
37 the risk of substandard medicines to Healthcare professionals.<sup>6</sup> A request to recall  
38 the affected batches is issued with the first three classes (class 1-3 drug alerts),  
39 comparable to the Health Product recall type I, II and III issued by Health Canada. A  
40 class 4 drug alert is issued by the UK drug regulator when a drug recall is not  
41 required, but caution is needed to deal with a substandard medicine. This type of  
42 communication is similar to the PA, HPC-NtoH and HPC-DHCPL used by Health  
43 Canada. A class 1 drug recall (issued in the UK), and both the Health Product recall  
44 type I and PW (issued in Canada) are considered to be urgent communications. The  
45 rest of the documents in both countries are deemed as semi-urgent  
46 communications.<sup>6, 14</sup>  
47  
48  
49  
50  
51  
52  
53  
54  
55  
56  
57  
58  
59  
60

1  
2  
3 Out of the 280 substandard medicines found in the UK, 17 (6%) were subject to  
4 urgent communication.<sup>7</sup> The corresponding number in Canada was 89 (14%) out of  
5 649. Overall, a larger number of substandard medicines were found in the Canadian  
6 supply chain (649 medicines) than in the UK (280 medicines).<sup>7</sup> It is also important to  
7 mention that the UK study was conducted over a longer period (i.e., 11 years) than  
8 the one on Canada (i.e., 9 years). Therefore, the difference in the number of  
9 substandard medicines may be even larger than it appears. The major contributor to  
10 this difference in our data was the number of medicines recalled due to stability  
11 problems (Figure 3), which were responsible for 50% of the difference. The  
12 differences in stability issues between Canada and the UK require further  
13 investigation.  
14  
15  
16  
17  
18  
19  
20

### 21 22 **Limitations**

23  
24 This study encountered some limitations. The expected adverse events associated  
25 with the use of substandard medicines were not reported by Health Canada or the  
26 manufacturers. Moreover, the adverse reaction database does not state the batch  
27 numbers of medicines reported with the complaint. Therefore we could not compare  
28 the expected risk associated with the recalled batches of substandard medicines  
29 with the adverse drug reaction database. Thus, the clinical significance of the  
30 problem is unknown.  
31  
32  
33  
34  
35  
36  
37  
38  
39

### 40 41 **CONCLUSION**

42 Substandard medicines are a problem in Canada and have resulted in an increasing  
43 number of recalled medicines. Most of the failures were related to stability issues,  
44 raising the need to investigate the root causes and for stringent preventative  
45 measures to be implemented by manufacturers. Regular GMP inspections on  
46 manufacturing sites were highlighted in this review as some of the most important  
47 tools that can improve detection of substandard medicines.  
48  
49  
50  
51

### 52 53 **Contributors:**

54 TA and IC conceived the study design and planned the research. TA performed the  
55 database search, extracted the data and drafted the manuscript. HS double-checked  
56  
57  
58  
59  
60

1  
2  
3 the extracted data, and interpreted the results. IC and HS edited and reviewed the  
4 manuscript. All authors approved the final version of the manuscript.  
5  
6  
7

8 **Competing interests:** None.  
9

10  
11 **Funding:** This research received no specific grant from any funding agency in the  
12 public, commercial or not-for-profit sectors.  
13  
14

15  
16 **Ethical approval:** Not required.  
17  
18

19  
20 **Data sharing:** No additional data available.  
21  
22  
23  
24  
25  
26  
27  
28  
29  
30  
31  
32  
33  
34  
35  
36  
37  
38  
39  
40  
41  
42  
43  
44  
45  
46  
47  
48  
49  
50  
51  
52  
53  
54  
55  
56  
57  
58  
59  
60

## References

1. Bate R, Coticelli P, Tren R, *et al.* Antimalarial drug quality in the most severely malarious parts of Africa – a six country study. *PLoS One* 2008;**3**:e2132.
2. Caudron JM, Ford N, Henkens M, *et al.* Substandard medicines in resource-poor settings: a problem that can no longer be ignored. *Trop Med Int Health* 2008;**13**(8):1062-1072.
3. Almuzaini T, Choonara I, Sammons H. Substandard and counterfeit medicines: a systematic review of the literature. *BMJ Open* 2013;**3**:e002923.
4. Mackey TK, Liang BA. The global counterfeit drug trade: patient safety and public health risks. *J Pharm Sci* 2011;**100**:4571–9
5. Bate R, Jensen P, Hess K, *et al.* Substandard and falsified anti-tuberculosis drugs: a preliminary field analysis. *Int J Tuberc Lung Dis* 2013;**17**(3):308-11.
6. MHRA. A Guide to Defective Medicinal Products. <http://www.mhra.gov.uk/home/groups/is-lic/documents/publication/con007572.pdf> (accessed 25 September 2014).
7. Almuzaini T, Sammons H, Choonara I. Substandard and falsified medicines in the UK: a retrospective review of drug alerts (2001–2011). *BMJ Open* 2013;**3**: e002924.
8. Attaran A, Barry D, Basheer S, *et al.* How to achieve international action on falsified and substandard medicines. *BMJ* 2012;**345**:e7381.
9. Ninan B, Wertheimer A. Withdrawing drugs in the U.S. versus other countries. *Innov Pharm* 2012;**3**(87):1-12.
10. Lexchin J. New drugs and safety: what happened to new active substances approved in Canada between 1995 and 2010? *Arch Intern Med* 2012;**172**(21):1680-1.
11. FDA. Counterfeit Version of Avastin in U.S. Distribution (2012). <http://www.fda.gov/drugs/drugsafety/ucm291960.htm> (accessed 25 September 2014).
12. Davies E. More US citizens die from meningitis as scope of inquiry widens. *BMJ* 2012;**345**:e7095.
13. Health Canada. Drugs and Health Products. <http://www.hc-sc.gc.ca/dhp-mps/index-eng.php> (accessed 25 September 2014).
14. Health Canada. Description of Current Risk Communication Documents for Marketed Health Products for Human Use - Guidance Document. [http://www.hc-sc.gc.ca/dhp-mps/pubs/medeff/guide/2008-risk-risques\\_comm\\_guid-dir/index-eng.php](http://www.hc-sc.gc.ca/dhp-mps/pubs/medeff/guide/2008-risk-risques_comm_guid-dir/index-eng.php). (accessed 25 September 2014).
15. WHOCC. ATC Structure and principles. [http://www.whooc.no/atc/structure\\_and\\_principles/](http://www.whooc.no/atc/structure_and_principles/) (accessed 25 September 2014).
16. Arie S. Contaminated drugs are held responsible for 120 deaths in Pakistan. *BMJ* 2012;**344**:e951.

17. The Institute for Safe Medication Practices (ISMP). Serious adverse drug event reports increase 25% in 2008. <http://www.ismp.org/QuarterWatch/2008Q4.pdf> (accessed 25 September 2014).
18. Health Canada. GMP Inspection Policy for Canadian Drug Establishments (POL-0011). [http://www.hc-sc.gc.ca/dhp-mps/compli-conform/gmp-bpf/pol/pol\\_0011\\_insp\\_drug\\_ltr-doc-eng.php](http://www.hc-sc.gc.ca/dhp-mps/compli-conform/gmp-bpf/pol/pol_0011_insp_drug_ltr-doc-eng.php). (accessed 25 September 2014).
19. Dickinson J. Most recalls due to FDA Inspection Findings. *Medical Marketing and Media*. 2001;**36**(5):30.
20. Auditor General of Canada. 2011 Fall Report of the Auditor General of Canada. Chapter 4: Regulating Pharmaceutical Drugs—Health Canada. [http://www.oag-bvg.gc.ca/internet/english/parl\\_oag\\_201111\\_04\\_e\\_35936.html#hd4d](http://www.oag-bvg.gc.ca/internet/english/parl_oag_201111_04_e_35936.html#hd4d) (accessed 25 September 2014).
21. The Institute of Medicine (IOM). Countering the Problem of Falsified and Substandard Drugs report (2013). <http://www.iom.edu/Reports/2013/Countering-the-Problem-of-Falsified-and-Substandard-Drugs.aspx> (accessed 25 September 2014).
22. Food and Drug Administration (FDA). Guidance for Industry: Product Recalls, Including Removals and Corrections, Rockville, MD, 2003. <http://www.fda.gov/Safety/Recalls/IndustryGuidance/ucm129259.htm>. (accessed 27 September 2014).
23. Health Canada. Health Products and Food Branch Inspectorate - Recall Policy (POL-0016), (2006). [http://www.hc-sc.gc.ca/dhp-mps/compli-conform/info-prod/drugs-droques/pol\\_0016\\_tc-tm-eng.php](http://www.hc-sc.gc.ca/dhp-mps/compli-conform/info-prod/drugs-droques/pol_0016_tc-tm-eng.php) (accessed 25 September 2014)
24. Health Canada. Compliance and Enforcement Policy (POL-0001), (2005). [http://www.hc-sc.gc.ca/dhp-mps/compli-conform/gmp-bpf/pol/pol\\_1\\_tc-tm-eng.php](http://www.hc-sc.gc.ca/dhp-mps/compli-conform/gmp-bpf/pol/pol_1_tc-tm-eng.php) (accessed 25 September 2014).
25. Association of the British Pharmaceutical Industry (ABPI). Global pharmaceutical industry and market. <http://www.abpi.org.uk/industry-info/knowledge-hub/global-industry/Pages/industry-market-.aspx> (accessed 25 September 2014).

## TABLES:

Table 1: Substandard medicines

| Defect Type                  | Number of medicines | %   | Defect details                                                                                                      | Number of medicines |
|------------------------------|---------------------|-----|---------------------------------------------------------------------------------------------------------------------|---------------------|
| Stability defects            | 205                 | 32  | Concern about stability of active ingredients                                                                       | 63                  |
|                              |                     |     | Levels of impurities in excess of specification at different time points                                            | 50                  |
|                              |                     |     | Dissolution, disintegration and drug release failure                                                                | 45                  |
|                              |                     |     | Others                                                                                                              | 47                  |
| Contamination                | 139                 | 21  | Impurities                                                                                                          | 82                  |
|                              |                     |     | Lack of sterility assurance                                                                                         | 35                  |
|                              |                     |     | Microbial contamination                                                                                             | 22                  |
| Minor packaging defects      | 71                  | 11  | Fault involving the external packaging or minor printing errors that do not involve name or strength of a medicines | 60                  |
|                              |                     |     | Missing or incorrect product registration number, batch number, manufacturer's name or expiry date                  | 11                  |
| Major packaging defects      | 65                  | 10  | Missing or incorrect name ,strength, or active ingredient of a medicine on carton or box                            | 35                  |
|                              |                     |     | Packing a medicine in the wrong carton or present of a foreign tablet or capsule in the bottle or blister           | 30                  |
| Defects in active ingredient | 62                  | 10  | Excessive amount of active ingredients                                                                              | 26                  |
|                              |                     |     | Inadequate amount of active ingredient                                                                              | 20                  |
|                              |                     |     | Active ingredient is out of specification                                                                           | 16                  |
| Delivery defects             | 35                  | 5   | Fault with a device                                                                                                 | 22                  |
|                              |                     |     | Leakage or loose/ tight seal ,cracks in a vial or broken tablets                                                    | 9                   |
|                              |                     |     | Others                                                                                                              | 4                   |
| Other defects                | 72                  | 11  | GMP deficiencies and deviation from preapproved specifications                                                      | 48                  |
|                              |                     |     | Inappropriate shipment                                                                                              | 14                  |
|                              |                     |     | Dissolution / disintegration failure                                                                                | 10                  |
| Total                        | 649                 | 100 |                                                                                                                     | 649                 |

**Table 2: Contaminated medicines subjected to urgent recalls (Health Product Recall type I).**

| Medications (number of incidents)                                                                                                | Formulation            | Defect description                                                                                                                  |
|----------------------------------------------------------------------------------------------------------------------------------|------------------------|-------------------------------------------------------------------------------------------------------------------------------------|
| Marcaine (2), acyclovir (1), nitroglycerin (1), magnesium sulfate (1), dexamethasone sodium (1), vistide (1) and carboplatin (1) | Solution for injection | Visible particulates were identified in the formulation (such as white, metallic or glass particles.)                               |
| Propofol (4) and fat emulsion (1)                                                                                                | Emulsion for injection |                                                                                                                                     |
| Extraneal (1) ciprofloxacin (1), carmustine (1), technetium Tc 99m (1) and liposomal amphotericin B (1)                          | Solution for injection | Microbial contamination (bacterial, fungal or viral contamination)                                                                  |
| Docusate sodium (1)                                                                                                              | Capsules               |                                                                                                                                     |
| Sucrose (1)                                                                                                                      | Oral liquid            |                                                                                                                                     |
| Benzalkonium chloride (1)                                                                                                        | Topical Liquid         |                                                                                                                                     |
| Sodium Chloride (1) and dextrose (1)                                                                                             | Solution for injection | Integrity of the foil seal is compromised leading to potential contamination of the vial adapter                                    |
| Diameal (1), DTE technetium Tc 99m (1), electrolyte infusion (1) and dextrose (1)                                                | Solution for injection | Lack of sterility assurance at the time of manufacture                                                                              |
| Gen Teal Artificial Tears (1)                                                                                                    | Ophthalmic Solution    |                                                                                                                                     |
| Heparin sodium (3)                                                                                                               | Solution for injection | Contamination with heparin-like contaminant                                                                                         |
| Quetiapine (3)                                                                                                                   | Tablets                | cross-contamination of trace amounts of clindamycin in quetiapine active pharmaceutical ingredient during the manufacturing process |

**Note:** All medicines were reported using health Product Recall Type I document



**Table 3: Substandard medicines subjected to urgent recalls (Health Product Recall type I and PW) with other defect types**

| Type of defect                                          | Medications (number of incidents)                                                                                                  | Formulation                                                                                           | Defect description                                                                                                                                                                                                                                                                                                                                                                                                                   |
|---------------------------------------------------------|------------------------------------------------------------------------------------------------------------------------------------|-------------------------------------------------------------------------------------------------------|--------------------------------------------------------------------------------------------------------------------------------------------------------------------------------------------------------------------------------------------------------------------------------------------------------------------------------------------------------------------------------------------------------------------------------------|
| <b>Major packaging defects</b><br>(incorrect labelling) | Trazodone (1), amlodipine (1) and fluvoxamine (1)                                                                                  | Tablets                                                                                               | Some products contained the wrong medicines due to labelling errors (e.g., amlodipine instead of minocycline, minocycline instead of amlodipine, clonazepam instead of rifampicin and fluphenazine instead of Octreotide) or filling errors (e.g., nabilone instead of trazodone, ciprofloxacin instead of fluvoxamine, trazodone instead of nabilone, Isoproterenol instead of morphine and blue collyrium instead of prednisolone) |
|                                                         | Nabilone (1), minocycline (1) and rifampicin (1)                                                                                   | Capsules                                                                                              |                                                                                                                                                                                                                                                                                                                                                                                                                                      |
|                                                         | Morphine sulphate (1) and octreotide acetate omega (1)                                                                             | Solution for injection                                                                                |                                                                                                                                                                                                                                                                                                                                                                                                                                      |
|                                                         | Prednisolone (1)*                                                                                                                  | Ophthalmic solution                                                                                   |                                                                                                                                                                                                                                                                                                                                                                                                                                      |
|                                                         | Hemodialysis acid concentrates (1), remifentanil HCl (1), pamidronate disodium (1), tobramycin (1) and triamcinolone acetonide (1) | Solution for injection                                                                                | Wrong strength , dosage or expiry date were printed on the packaging                                                                                                                                                                                                                                                                                                                                                                 |
|                                                         | Sodium solysterene sulfonate (1)                                                                                                   | Suspension                                                                                            |                                                                                                                                                                                                                                                                                                                                                                                                                                      |
|                                                         | Acetaminophen (1)                                                                                                                  | Suppositories                                                                                         |                                                                                                                                                                                                                                                                                                                                                                                                                                      |
|                                                         | Personnelle cold and flu tablets (2), acetylsalicylic acid (1), acetaminophen (1) and Personelle acid control (1)                  | Tablets                                                                                               | Important mandatory warning statement was missed on the external packaging                                                                                                                                                                                                                                                                                                                                                           |
|                                                         | Oral contraceptive pills (4)                                                                                                       | Tablets                                                                                               | Additional placebo tablet was found in place of an active tablet in one blister pack raising the risk of unwanted pregnancy                                                                                                                                                                                                                                                                                                          |
| Ibuprofen (2)                                           | Tablets                                                                                                                            | The label stated that the bottle had a child resistant cap, but the cap used was not child resistant. |                                                                                                                                                                                                                                                                                                                                                                                                                                      |
| <b>Stability defects</b>                                | Smallpox vaccine (1)                                                                                                               | Solution for injection                                                                                | Evidence of instability based on its appearance.                                                                                                                                                                                                                                                                                                                                                                                     |
|                                                         | Timolol (1)                                                                                                                        | Ophthalmic Solution                                                                                   | Active ingredient was out of specification after 12 month of production date                                                                                                                                                                                                                                                                                                                                                         |
|                                                         | Valproic acid (1)                                                                                                                  | Capsules                                                                                              | Disintegration test failure within the shelf life of the drug                                                                                                                                                                                                                                                                                                                                                                        |
|                                                         | Amoxicillin (1)                                                                                                                    | Suspension                                                                                            | Out of specification assay result was obtained at various time points.                                                                                                                                                                                                                                                                                                                                                               |
| <b>Active ingredients defects</b>                       | Phenobarbital (1)* and morphine SR (1)                                                                                             | Tablets                                                                                               | Oversized tablets were found raising the risk of overdose                                                                                                                                                                                                                                                                                                                                                                            |
|                                                         | Acetylsalicylic acid (1)                                                                                                           |                                                                                                       | Inadequate amount of active ingredient                                                                                                                                                                                                                                                                                                                                                                                               |
|                                                         | Delflex (1)and carmustine (1)                                                                                                      | Solution for injection                                                                                | Excessive amount of active ingredients                                                                                                                                                                                                                                                                                                                                                                                               |
|                                                         | Ethacrynic acid (1)                                                                                                                |                                                                                                       | Inadequate amount of active ingredient                                                                                                                                                                                                                                                                                                                                                                                               |
| <b>Delivery defects</b>                                 | Paliperidone palmitate (1), nutrinal (1), degarelix (1), caspofungin acetate (1), vancomycin (1) and argatroban (1)                | Solution for injection                                                                                | Cracks in the syringes or vials , or leaks from the bags were identified raising the risk of contamination                                                                                                                                                                                                                                                                                                                           |
|                                                         | Sumatriptan (1)                                                                                                                    |                                                                                                       | Pre-filled syringes were filled with needles that protruded through the needle shield                                                                                                                                                                                                                                                                                                                                                |
|                                                         | Morphine sulphate (1)                                                                                                              |                                                                                                       | Plunger friction with the vial may cause pump occlusion or delivery of inaccurate dose                                                                                                                                                                                                                                                                                                                                               |
|                                                         | Cough and Cold syrup (9)                                                                                                           | Syrup                                                                                                 | The child-resistant feature of the bottle cap was not functioning properly                                                                                                                                                                                                                                                                                                                                                           |
| <b>Other</b>                                            | Hypromellose (1)                                                                                                                   | lubricant eye gel                                                                                     | Non-compliance with Good manufacturing practices                                                                                                                                                                                                                                                                                                                                                                                     |

\*Medicine was reported using the Public Warning document. Others were reported using Health Product Recall type I

**Table 4: Substandard medicines categorised by type of marketing authorisation holders**

| Type of quality defect | Medicines marketed by manufacturers<br>(n = 122) | Medicines marketed by distributors<br>(n = 26) | P-Value* |
|------------------------|--------------------------------------------------|------------------------------------------------|----------|
|                        | Number of medicines, (%)                         | Number of medicines, (%)                       |          |
| Stability              | 191 (31)                                         | 14 (37)                                        | 0.476    |
| Contamination          | 134 (22)                                         | 5 (13)                                         | 0.228    |
| Minor packaging        | 69 (11)                                          | 2 (5)                                          | 0.417    |
| Major packaging        | 60 (10)                                          | 5 (13)                                         | 0.573    |
| Active ingredient      | 59 (10)                                          | 3 (8)                                          | 1.000    |
| Delivery               | 34 (5)                                           | 1 (3)                                          | 0.714    |
| Others                 | 64 (11)                                          | 8 (21)                                         | 0.058    |
| <b>Total</b>           | <b>611 (100)</b>                                 | <b>38 (100)</b>                                |          |

\*A significant difference was defined at a p value <0.05.

### Figure legends:

Figure 1: Flow diagram of search and resulting incidents.

Figure 2: Number of incidents of defective medicines reported by Health Canada.

Figure 3: Comparison between Canada and the UK in the types of substandard medicines.

1  
2  
3 **Quality of medicines in Canada: a retrospective review of risk**  
4 **communication documents (2005–2013)**  
5  
6  
7

8 Tariq Almuzaini<sup>1</sup>, Helen Sammons<sup>1</sup>, Imti Choonara<sup>1</sup>  
9

10  
11 (1) Academic Division of Child Health, University of Nottingham, Derbyshire  
12 Children's Hospital, Derby, UK  
13

14  
15  
16 **Corresponding author**  
17

18 Tariq Almuzaini  
19

20 Academic Division of Child Health  
21

22 The Medical School  
23

24 University of Nottingham  
25

26 Derbyshire Children's Hospital  
27

28 Uttoxeter Road  
29

30 Derby DE22 3DT  
31

32 UK  
33

34  
35 Email: [mzxta@exmail.nottingham.ac.uk](mailto:mzxta@exmail.nottingham.ac.uk)  
36  
37

38  
39 **Abstract:** 252 words  
40

41 **Full text:** 3589 words  
42

43 **Number of figures:** 3  
44

45 **Number of tables:** 4  
46  
47

48  
49 **Keywords:** Falsified, substandard, defective, medicines, recalls  
50  
51  
52  
53  
54  
55  
56  
57  
58  
59  
60

## ABSTRACT

**Objective:** To explore the quality and safety of medicines in Canada.

**Design:** A retrospective review of drug recalls and risk communication documents conveying issues relating to defective (i.e., substandard and falsified) medicines.

**Setting:** The Health Canada website search for drug recalls and risk communication documents issued between 2005 and 2013.

**Eligibility criteria:** Drug recalls and risk communication documents related to quality defect in medicinal products.

**Main outcome measure:** Relevant data about defective medicines reported in drug recalls and risk communication documents, including description of the defect, type of formulation, year of the recall and category of the recall or the document.

**Results:** There were 653 defective medicines of which 649 were substandard. The number of defective medicines reported by Health Canada increased from 42 in 2005 to 143 in 2013. The two most frequently reported types of defects were stability (205 incidents) and contamination issues (139 incidents). Some of these defects were found to be more prominent and repetitive over other types within some manufacturers. Tablet formulation (251 incidents) was the formulation most frequently compromised. No significant differences were observed between the manufacturers and distributors in the number of substandard medicines reported under each defect type. There were only four falsified medicines reported over the nine-year period.

**Conclusions:** [Substandard medicines are a problem in Canada and have resulted in an increasing number of recalled medicines.](#) Most of the failures were related to stability issues, raising the need to investigate the root causes and for stringent preventative measures to be implemented by manufacturers.

### Strengths and limitations of this study

- It is the first review to assess the problem of defective medicines in Canada.
- It quantifies and analyses drug recalls in Canada over a 9- year period.
- Clinical significance of the problem is undetermined, owing to the lack of data from Health Canada regarding adverse events associated with the use of defective medicines.

### INTRODUCTION

Defective medicines are a major public health problem<sup>1-4</sup> Different surveys in lower income countries (LIC) and lower-middle-income countries (LMIC) have found that defective medicines are readily available.<sup>3, 5</sup>

Defective medicine is a term used to describe any drug with a quality defect, whether the error was due to deliberate falsification or unintentional error during manufacturing.<sup>6, 7</sup> It is a large category that comprises two main types of compromised drugs, substandard and falsified medicines. A substandard medicine is a medicine that does not meet the regulator standards due to an unintentional or negligent error.<sup>8</sup> A falsified medicine, however, is one where deliberate and criminal intent is involved.<sup>8</sup>

In high income countries (HIC), there have been no studies with good methodological quality examining the overall prevalence of substandard or falsified medicines.<sup>3</sup> [The surveillance system in HIC in Europe and North America, however, is a well-established system that has identified and withdrawn several medicines from the market with serious safety concerns.](#)<sup>9, 10</sup> These surveillance systems have reported numerous incidents of substandard and falsified medicines, and highlighted the problem of such drugs in these countries. Examples of these are the falsified cancer drug, Avastin, and substandard spinal steroid injections reported in the USA.<sup>11, 12</sup> In our previous study on the UK, we studied the problem of defective medicines in the UK by reviewing the drug alerts issued by the drug regulator over an 11-year period. The study showed that substandard medicines are [a problem that appears to be increasing.](#)<sup>7</sup> We wished to explore another HIC and chose Canada, as the problem of

1  
2  
3 defective medicines has never been explored in this setting and [because of the level of](#)  
4 [data available in the public domain](#).  
5  
6

7 In Canada, Health products are regulated by Health Canada, which is the federal  
8 department responsible for the monitoring and regulating of medicines.<sup>13</sup> It issues a  
9 number of risk communication documents to the public and healthcare professionals.  
10 These involve identification of the possible risk, assessment of its severity and  
11 clarification of the nature of the problem. This communication is also initiated to  
12 disseminate information regarding new safety issues of medicines or existing health  
13 risks to allow healthcare professionals and their patients to make well-informed  
14 decisions about their health.<sup>14</sup>  
15  
16  
17  
18  
19

20  
21 The aim of this study was to explore the quality and safety of medicines in Canada by  
22 analysing the risk communication documents conveying issues relating to defective  
23 medicines.  
24  
25  
26  
27  
28

## 29 **METHODS**

30  
31 Health Canada uses 13 risk communication documents, which can be issued for the  
32 public, healthcare professionals, and hospitals.<sup>14</sup> A preliminary search for these risk  
33 communication documents found that only five documents can be used by Health  
34 Canada to convey any defective health product issue in the Canadian official supply  
35 chain. These can be described as follows:  
36  
37  
38  
39

- 40 • **Public Warning (PW):** issued by Health Canada if the use of the drug can  
41 cause a severe adverse health consequence that may lead to death.  
42  
43
- 44 • **Public Advisory (PA):** issued by Health Canada if exposure to or the use of  
45 the drug can cause adverse health consequences, but is not life threatening  
46 or serious.  
47  
48
- 49 • **Healthcare Professional Communication - Notice to Hospitals (HPC-  
50 NtoH):** to inform the healthcare professional about time-sensitive issues  
51 concerning safety and/or efficacy of medicinal products. It is intended for  
52 hospital use only.  
53  
54  
55  
56  
57  
58  
59  
60

- 1
- 2
- 3
- 4
- 5
- 6
- 7
- 8
- 9
- 10
- 11
- 12
- 13
- 14
- 15
- 16
- 17
- 18
- 19
- 20
- 21
- 22
- 23
- 24
- 25
- 26
- 27
- 28
- 29
- 30
- 31
- 32
- 33
- 34
- 35
- 36
- 37
- 38
- 39
- 40
- 41
- 42
- 43
- 44
- 45
- 46
- 47
- 48
- 49
- 50
- 51
- 52
- 53
- 54
- 55
- 56
- 57
- 58
- 59
- 60
- **Healthcare Professional Communication - Dear Health Care Professional Letter (HPC-DHCPL):** to inform the healthcare professional about issues regarding safety and/or efficacy of medicinal products.
- **Health Product Recall (with type I, II or III):** These can be classified according to the urgency of the recall as follows:
  - Health Product Recall type I: issued if the health product can cause severe adverse health consequence that may lead to death.
  - Health Product Recall type II: issued if the exposure to or the use of the health product can cause adverse health consequences but is not life threatening or serious.
  - Health Product Recall type III: The exposure to or use of the health product is not likely to cause any harm but the recall is initiated for other reasons such as minor deviation from specifications.

Both PW and Health Product Recall type I are considered by Health Canada to be urgent communications, as they are issued for a medicine which may pose a serious health risk. PA, HPC-NtoH, HPC-DHCPL and type II and III Health Product Recalls are semi-urgent communications where the risk associated with the use of a medicine is not serious.<sup>14</sup>

A search for risk communication documents conveying issues relating to defective medicines (i.e., substandard and falsified medicines) was carried out. This was performed through the official Health Canada's website and using the search engine allocated for advisories, warnings, and recalls of health products (<http://www.hc-sc.gc.ca/dhp-mpps/medeff/advisories-avis/index-eng.php>). Health Canada started posting Health Product Recalls on its website in 2005. These recalls are the main tool that Health Canada uses to convey quality issues with medicines. Before that, there were only two types of risk communication documents (PA and HPC-DHCPL) available on Health Canada's website. We wanted to examine the same documents throughout the years. Therefore, the search was started from 2005, and all risk communication documents issued [between 1 January 2005 and 31 December 2013](#) were included. All risk communication documents (PW, PA, HPC-DHCPL, HPC-NtoH and Health Product Recalls) were reviewed and the relevant information was then extracted.

1  
2  
3 All relevant information regarding defective health products was compiled and  
4 exclusion criteria were as follows: veterinary medicines; medicines lacking efficacy or  
5 [acquiring general safety issues](#); herbal and probiotic products; dietary and cosmetic  
6 products; and other natural health product recalled for regulatory reason (i.e., those  
7 do not have a valid marketing authorisation). The following data were extracted from  
8 the risk communication documents: name, strength, and dosage form; year of the  
9 document; nature of the defect; type of drug recall (in the case of Health Product  
10 Recalls); and action to be taken by healthcare professionals or the public regarding  
11 the defective medicine. In the case of Health Product Recalls and PW, the action is  
12 to remove the defective medicine from the dispensary shelves and contact the  
13 manufacturer for return. Whereas, with other risk communication documents where  
14 there is no recall required, healthcare professionals and the public are given advice  
15 on how to deal with defective medicines and to alert the public to be aware of  
16 expected risks. Two types of drugs can be distinguished from risk communication  
17 documents; substandard drugs and falsified drugs. The decision on which incident  
18 was falsified or substandard is that published by Health Canada.  
19  
20  
21  
22  
23  
24  
25  
26  
27  
28  
29

30 The type of defects were then classified using the same classification as used in our  
31 previous study.<sup>7</sup> The quality defects were classified as contamination, minor or major  
32 packaging defect, delivery (e.g., leaking bags) defect, stability failure, potency  
33 issues, active ingredient defect and other issues (such as other deviations  
34 concerning non-compliance with good manufacturing practice at manufacturing site).  
35  
36  
37  
38

39 The WHO Organization Anatomical Therapeutic Chemical (ATC) Classification  
40 System was used to classify defective medicines.<sup>15</sup> The first level of this classification  
41 categorises medicines according to the organ or system in which they act and the  
42 second level classifies medicines according to their main therapeutic group. This  
43 was performed to highlight the most frequent therapeutic classes affected by these  
44 recalls.  
45  
46  
47  
48  
49

### 50 **Method of analysis**

51

52 Minitab (version 16) software was used to store and analyse the data. Descriptive  
53 statistics were used to summarise the results. Marketing authorisation holders of  
54 recalled medicines were either licensed manufacturers or distributors. A comparison  
55 between the manufacturers and distributors in the number of substandard medicines  
56  
57  
58  
59  
60



1  
2  
3 reported under each type of quality defect was carried out using Fisher's exact test.  
4 A significant difference was defined at a p value <0.05. The comparison was  
5 conducted to investigate if there are certain types of quality defects (e.g., stability or  
6 packaging issues) that were more likely to be reported with distributors, as this may  
7 indicate non-compliance with Good Distribution Practices.  
8  
9  
10

## 11 RESULTS

12  
13 A total of 653 defective medicines were identified in the Canadian supply chain  
14 (Figure 1). Among these defective medicines, 649 were found to be substandard  
15 medicines, and only four were found to be falsified medicines in the nine years  
16 studied. The rate of reporting defective medicines has increased each year over the  
17 last six years (Figure 2).  
18  
19  
20  
21  
22

### 23 Substandard medicines

24  
25 Substandard medicines represent the bulk of defective medicines ( $n= 649$ , 99%)  
26 reported by Health Canada. The two most frequent types of defects reported were  
27 stability ( $n= 205$ , 32%) and contamination ( $n= 139$ , 21%) issues (Table 1). It is clear  
28 that substandard medicines with stability defects represent the largest group. The  
29 majority of these formulations were found to have degraded one year after their  
30 release into the market, resulting in low concentrations of active ingredients,  
31 impurities, dissolution and disintegration failures. Tablets were the formulation most  
32 frequently reported to be substandard (supplementary table 1).  
33  
34  
35  
36  
37  
38  
39

40 Among the 649 substandard medicines, 89 (14%) were subjected to urgent  
41 communications and therefore required urgent recalls. These medicines were  
42 reported using the Health Product Recall type 1 ( $n= 87$ ) and the PW ( $n=2$ ). More  
43 than half of these medicines ( $n= 46$ , 53%) were parenteral formulations (Tables 2  
44 and 3). Of the 89 medicines that were recalled, 34 were contaminated. The majority  
45 of these were parenteral formulations that were recalled due to the presence of  
46 particulate matters, the presence of microbes, or a lack of sterility assurance during  
47 their manufacture (Table 2). The remaining substandard medicines ( $n= 55$ ) were  
48 urgently recalled due to other types of defects (Table 3), mainly packaging defects or  
49 delivery issues (such as cracks in the vials or leaks in the bags, as well as faults in  
50 the unit used to deliver the medicines). Packaging defects were one of the major  
51  
52  
53  
54  
55  
56  
57  
58  
59  
60

1  
2  
3 clinical issues reported, and these included incorrect labelling (i.e., wrong drug  
4 name, strength, or expiry date) and packaging that lacked important information  
5 regarding safety or the use of medicines in the patient information leaflets. In some  
6 cases, the labelling was correct, but the wrong medicines were filled, resulting in  
7 major and urgent recalls of affected batches (Table 3).  
8  
9

10  
11  
12 Other substandard medicines ( $n= 560$ , 86%) were subjected to semi-urgent recalls  
13 ( $n= 536$ ) or caution in use ( $n= 24$ ). These were reported via the Health Product  
14 Recall type II ( $n= 288$  medicines, 44%) and III ( $n= 245$ , 38%), PA ( $n= 8$ , 1%), HPC-  
15 NtoH ( $n= 9$ , 1%) and HPC-DHCPL ( $n= 7$ , 1%). Three medicines were recalled, but  
16 the corresponding type of Health Product Recall was not given by Health Canada.  
17 The majority of these drugs had stability, contamination and packaging defects  
18 (supplementary table 2).  
19  
20  
21  
22  
23

24  
25 Drugs that act on the nervous system ( $n= 141$ , 22%), alimentary tract and  
26 metabolism ( $n= 90$ , 14%), and cardiovascular system ( $n= 83$ , 13%) were the  
27 subgroups that most frequently contained substandard medicines. When the second  
28 level of this classification (i.e., therapeutic classification) was used, the top three  
29 groups reported to be substandard were analgesics ( $n= 65$ , 10%), antihypertensives  
30 ( $n= 50$ , 8%) and antibacterials ( $n= 38$ , 6%) (supplementary table 3).  
31  
32  
33  
34  
35  
36  
37

### 38 **Substandard medicines categorised by manufacturers**

39  
40 The review identified 122 licensed manufacturers and 26 licensed distributors.  
41 Manufacturers held the marketing authorisation for 611 substandard medicines and  
42 distributors for 38 (Table 4). No unlicensed manufacturers or distributors were  
43 involved. A comparison between those manufacturers and distributors in the number  
44 of substandard medicines reported under each defect type and the p values for  
45 these differences is presented in Table 4. No significant differences were observed  
46 between manufacturers and distributors.  
47  
48  
49  
50  
51

52  
53 The top 20 manufacturers are listed in supplementary table 4. It was noted that 50%  
54 or more of substandard medicines manufactured by Apotex Inc., Pfizer Canada Inc.  
55 and Laboratoire Riva Inc. had stability issues. Almost half of the substandard  
56 products from Baxter Co., Hospira Healthcare Co. and GlaxoSmithKline Inc. were  
57  
58  
59  
60

1  
2  
3 contaminated. Products of Sandoz Canada Inc. had a problem with the active  
4 ingredient; **the concentration was either too high or too low**. More than half of  
5 Novartis products, which are reported to be substandard, were recalled due to  
6 delivery concerns, such as failure of the child-resistant feature of the bottle cap or  
7 leaks in the infusion bags.  
8  
9  
10

### 11 12 13 14 **Falsified medicines** 15

16  
17 Four incidents of falsified medicines were identified in Canada's supply chain  
18 between 2011 and 2013. All these incidents involved two sexual enhancement  
19 medicines, Viagra® (sildenafil) and Cialis® (tadalafil).  
20  
21

22  
23 In all cases of falsified medicines, Public Advisories were issued to inform the public  
24 to contact their healthcare professionals if they had concerns about these falsified  
25 medicines. The public was also advised to verify that these products were assessed  
26 by Health Canada for safety by looking at the authorisation number printed on the  
27 label. These medicines were seized in the retail outlets in Canada, and no further  
28 information was given by Health Canada about the subsequent investigation or  
29 action taken by Health Canada.  
30  
31  
32  
33  
34  
35  
36  
37

### 38 **DISCUSSION** 39

40 This is the first review that discusses the issue of substandard and falsified  
41 medicines in Canada by evaluating the risk communication documents and drug  
42 recalls posted on Health Canada website. Our observations of defective medicines  
43 recalls over nine consecutive years, from 2005 to 2013, have shown that the recall of  
44 substandard medicines is an increasing trend. It is concerning that over half of the  
45 stability failures were related to instability of active ingredients or dissolution and  
46 disintegration failure. Both defects have the potential to affect the bioavailability of  
47 the active ingredients in the systemic circulation, and in turn, may lead to therapeutic  
48 failure.  
49  
50  
51  
52  
53  
54  
55  
56  
57  
58  
59  
60

## Substandard medicines

The most frequent type of formulation reported to be substandard were tablets. Tablets have a slow onset of action and require less precaution in terms of sterility, than parenteral formulations. The extent of adverse consequences that can arise from failure to comply with manufacturing requirements, however, cannot be ignored. This was evident from the death of 120 patients in Pakistan due to contamination of isosorbide mononitrate tablets with large doses of an antimalarial drug.<sup>16</sup> Another of the most pronounced examples is the phenobarbital and morphine tablet recalls in Canada. Oversized tablets (i.e. tablets that exceed the weight requirement) were found in both drugs, raising the risk of the patients taking as much as double the strength stated on the bottle (Table 3). The Institute for Safe Medication Practices (ISMP), a non-profit organisation, stated that the US manufacturer (KV Pharmaceutical) received abnormally high reports of serious adverse events concerning overdose of these recalled tablets.<sup>17</sup> However, owing to the lack of sufficient details, it was impossible to link the overdose events specifically to the substandard tablets. The Adverse events relating to this defect have not been documented by Health Canada.

It was uncertain whether the rise of substandard medicines incidents were related to improved detection by Health Canada or due to an increase of substandard medicine production by manufacturers. The rate of increased incidence of substandard medicines could be associated with the implementation of improved detection policies and regulations by Health Canada. Introduction of Good Manufacturing Practices (GMP) inspection policy for Canadian drug establishments may be one of the explanations.<sup>18</sup> Since 1996, there have been numerous changes in GMP guidelines and international agreements. These led Health Canada to update its policy on GMP inspection in January 2008 as a response to harmonise its GMP compliance programme with drug regulatory authorities in other countries.<sup>18</sup> Subsequently, there has been a steady increase of incidents of substandard medicines from 2008 to 2013 (Figure 2). Similarly, it has been highlighted that most of the FDA recalls were related to FDA inspectors' visits in the USA.<sup>19</sup>

The GMP policy illustrates the procedures Health Canada follows to ensure that all drug establishments comply with GMP guidelines. This is conducted via inspections

1  
2  
3 with varying cycles according to a risk-based approach to assess complaints about  
4 medicines, and a ranking scale of priority.<sup>18</sup> This assessment is to ensure that these  
5 complaints are dealt with in a timely manner. The performance of Health Canada in  
6 using the risk-based approach, however, was criticised in the 2011 report of the Auditor  
7 General of Canada.<sup>20</sup> Based on a representative sample (50) of the files that Health  
8 Canada received in 2009 and 2010 concerning drug-related complaints, only 27 were  
9 dealt with according to the established risk-based standard operating procedures for  
10 prioritising reported complaints. The report concluded that Health Canada did not  
11 consistently apply its risk-based approach and therefore some of these complaints  
12 might not be processed in a timely manner proportional to their expected risk.<sup>20</sup>  
13 Therefore, the possibility that the increase in substandard medicines was a result of  
14 poor manufacturing practices cannot be excluded.  
15  
16  
17  
18  
19  
20  
21  
22  
23

### 24 **Manufacturing errors and investigation of the root cause**

25  
26 It is the responsibility of the manufacturers and marketing authorisation holders to recall  
27 their substandard products after consultation with Health Canada. The majority of these  
28 recalls were issued by the manufacturers or marketing authorisation holders using the  
29 Health Product Recall type I, II and III, which accounted for 95% of the total  
30 substandard medicines reported. Stability issues were mainly identified by the  
31 manufacturers during on-going stability testing. However, it is unknown whether these  
32 defects were identified by internal auditing systems of the manufacturers, by  
33 intervention of the Health Canada inspection team or by reports from healthcare  
34 professionals.  
35  
36  
37  
38  
39  
40  
41

42 Analysing pharmaceutical product recalls can be of great importance to identify the root  
43 causes of recalled medicines. The prompting of a drug recall can be regarded as a  
44 disastrous failure of the manufacturer's quality plan. Even with stringent quality  
45 measures, errors can occur.<sup>21, 22</sup> Thus, it is very important to identify the root cause of  
46 the defects to avoid similar episodes in the future. The root cause for a defect is  
47 required to be submitted to Health Canada, as soon as it is identified, along with other  
48 information relating to the quantity and depth of the distribution of the affected  
49 medicine. It is the responsibility of Health Canada to monitor the overall procedure and  
50 assess the root cause for this problem and, if required, to conduct an inspection to  
51 verify that a corrective action is implemented.<sup>23, 24</sup> It has been highlighted in this review  
52  
53  
54  
55  
56  
57  
58  
59  
60

1  
2  
3 that stability failure and contamination issues were the defect types being reported  
4 most frequently. These issues affected several manufacturers on more than one  
5 occasion (supplementary table 4). This highlights the need for root cause investigations  
6 and appropriate measures to be implemented by manufacturers [as well as effective](#)  
7 [monitoring by Health Canada.](#)  
8  
9

### 10 11 **Falsified medicines**

12  
13  
14 Only four incidents of falsified medicines were reported by Health Canada. The  
15 detection is extremely low compared with substandard medicine. Health Canada has  
16 robust GMP inspections that cover all drug establishments including manufacturers,  
17 distributors and wholesalers. The reporting system of Health Canada is concerned  
18 with falsified medicines detected within the scope of GMP inspections.<sup>18</sup> Some  
19 falsified medicines may be intercepted and seized by enforcement bodies on their  
20 way to target destinations, but not necessarily intended for the Canadian market.  
21 This may explain the low detection rate by Health Canada.  
22  
23  
24  
25  
26  
27

### 28 29 **Comparison with the UK**

30  
31 [Despite the fact that Canada and the UK represent 2% \(for each\) of the global](#)  
32 [pharmaceutical market volume, they are two of the top markets by value of marketed](#)  
33 [medicines.](#) Canada and the UK hold equal global pharmaceutical market share  
34 values of USD \$21,877 and USD \$21,635 billion, respectively.<sup>25</sup> They also use  
35 similar approaches in dealing with substandard medicines based on the expected  
36 risk. In the UK, the drug regulator uses four classes of drug alerts to communicate  
37 the risk of substandard medicines to Healthcare professionals.<sup>6</sup> A request to recall  
38 the affected batches is issued with the first three classes (class 1-3 drug alerts),  
39 comparable to the Health Product recall type I, II and III issued by Health Canada. A  
40 class 4 drug alert is issued by the UK drug regulator when a drug recall is not  
41 required, but caution is needed to deal with a substandard medicine. This type of  
42 communication is similar to the PA, HPC-NtoH and HPC-DHCPL used by Health  
43 Canada. A class 1 drug recall (issued in the UK), and both the Health Product recall  
44 type I and PW (issued in Canada) are considered to be urgent communications. The  
45 rest of the documents in both countries are deemed as semi-urgent  
46 communications.<sup>6, 14</sup>  
47  
48  
49  
50  
51  
52  
53  
54  
55  
56  
57  
58  
59  
60

1  
2  
3 Out of the 280 substandard medicines found in the UK, 17 (6%) were subject to  
4 urgent communication.<sup>7</sup> The corresponding number in Canada was 89 (14%) out of  
5 649. Overall, a larger number of substandard medicines were found in the Canadian  
6 supply chain (649 medicines) than in the UK (280 medicines).<sup>7</sup> It is also important to  
7 mention that the UK study was conducted over a longer period (i.e., 11 years) than  
8 the one on Canada (i.e., 9 years). Therefore, the difference in the number of  
9 substandard medicines may be even larger than it appears. The major contributor to  
10 this difference in our data was the number of medicines recalled due to stability  
11 problems (Figure 3), which were responsible for 50% of the difference. The  
12 differences in stability issues between Canada and the UK require further  
13 investigation.  
14  
15

### 21 22 **Limitations**

23  
24 This study encountered some limitations. The expected adverse events associated  
25 with the use of substandard medicines were not reported by Health Canada or the  
26 manufacturers. Moreover, the adverse reaction database does not state the batch  
27 numbers of medicines reported with the complaint. Therefore we could not compare  
28 the expected risk associated with the recalled batches of substandard medicines  
29 with the adverse drug reaction database. Thus, the clinical significance of the  
30 problem is unknown.  
31  
32  
33  
34  
35  
36  
37  
38

### 39 40 **CONCLUSION**

41  
42 Substandard medicines are a problem in Canada and have resulted in an increasing  
43 number of recalled medicines. Most of the failures were related to stability issues,  
44 raising the need to investigate the root causes and for stringent preventative  
45 measures to be implemented by manufacturers. Regular GMP inspections on  
46 manufacturing sites were highlighted in this review as some of the most important  
47 tools that can improve detection of substandard medicines.  
48  
49  
50  
51

### 52 53 **Contributors:**

54 TA and IC conceived the study design and planned the research. TA performed the  
55 database search, extracted the data and drafted the manuscript. HS double-checked  
56  
57  
58  
59  
60



1  
2  
3 the extracted data, and interpreted the results. IC and HS edited and reviewed the  
4 manuscript. All authors approved the final version of the manuscript.  
5  
6  
7

8 **Competing interests:** None.  
9

10  
11 **Funding:** This research received no specific grant from any funding agency in the  
12 public, commercial or not-for-profit sectors.  
13  
14

15  
16 **Ethical approval:** Not required.  
17  
18

19  
20 **Data sharing:** No additional data available.  
21  
22  
23  
24  
25  
26  
27  
28  
29  
30  
31  
32  
33  
34  
35  
36  
37  
38  
39  
40  
41  
42  
43  
44  
45  
46  
47  
48  
49  
50  
51  
52  
53  
54  
55  
56  
57  
58  
59  
60



## References

1. Bate R, Coticelli P, Tren R, *et al.* Antimalarial drug quality in the most severely malarious parts of Africa – a six country study. *PLoS One* 2008;**3**:e2132.
2. Caudron JM, Ford N, Henkens M, *et al.* Substandard medicines in resource-poor settings: a problem that can no longer be ignored. *Trop Med Int Health* 2008;**13**(8):1062-1072.
3. Almuzaini T, Choonara I, Sammons H. Substandard and counterfeit medicines: a systematic review of the literature. *BMJ Open* 2013;**3**:e002923.
4. Mackey TK, Liang BA. The global counterfeit drug trade: patient safety and public health risks. *J Pharm Sci* 2011;**100**:4571–9
5. Bate R, Jensen P, Hess K, *et al.* Substandard and falsified anti-tuberculosis drugs: a preliminary field analysis. *Int J Tuberc Lung Dis* 2013;**17**(3):308-11.
6. MHRA. A Guide to Defective Medicinal Products. <http://www.mhra.gov.uk/home/groups/is-lic/documents/publication/con007572.pdf> (accessed 25 September 2014).
7. Almuzaini T, Sammons H, Choonara I. Substandard and falsified medicines in the UK: a retrospective review of drug alerts (2001–2011). *BMJ Open* 2013;**3**: e002924.
8. Attaran A, Barry D, Basheer S, *et al.* How to achieve international action on falsified and substandard medicines. *BMJ* 2012;**345**:e7381.
9. Ninan B, Wertheimer A. Withdrawing drugs in the U.S. versus other countries. *Innov Pharm* 2012;**3**(87):1-12.
10. Lexchin J. New drugs and safety: what happened to new active substances approved in Canada between 1995 and 2010? *Arch Intern Med* 2012;**172**(21):1680-1.
11. FDA. Counterfeit Version of Avastin in U.S. Distribution (2012). <http://www.fda.gov/drugs/drugsafety/ucm291960.htm> (accessed 25 September 2014).
12. Davies E. More US citizens die from meningitis as scope of inquiry widens. *BMJ* 2012;**345**:e7095.
13. Health Canada. Drugs and Health Products. <http://www.hc-sc.gc.ca/dhp-mps/index-eng.php> (accessed 25 September 2014).
14. Health Canada. Description of Current Risk Communication Documents for Marketed Health Products for Human Use - Guidance Document. <http://www.hc-sc.gc.ca/dhp-mps/pubs/medeff/ guide/2008-risk-risques comm guid-dir/index-eng.php>. (accessed 25 September 2014).
15. WHOCC. ATC Structure and principles. [http://www.whooc.no/atc/structure\\_and\\_principles/](http://www.whooc.no/atc/structure_and_principles/) (accessed 25 September 2014).
16. Arie S. Contaminated drugs are held responsible for 120 deaths in Pakistan. *BMJ* 2012;**344**:e951.

17. The Institute for Safe Medication Practices (ISMP). Serious adverse drug event reports increase 25% in 2008. <http://www.ismp.org/QuarterWatch/2008Q4.pdf> (accessed 25 September 2014).
18. Health Canada. GMP Inspection Policy for Canadian Drug Establishments (POL-0011). [http://www.hc-sc.gc.ca/dhp-mps/compli-conform/gmp-bpf/pol/pol\\_0011\\_insp\\_drug\\_ltr-doc-eng.php](http://www.hc-sc.gc.ca/dhp-mps/compli-conform/gmp-bpf/pol/pol_0011_insp_drug_ltr-doc-eng.php). (accessed 25 September 2014).
19. Dickinson J. Most recalls due to FDA Inspection Findings. *Medical Marketing and Media*. 2001;**36**(5):30.
20. Auditor General of Canada. 2011 Fall Report of the Auditor General of Canada. Chapter 4: Regulating Pharmaceutical Drugs—Health Canada. [http://www.oag-bvg.gc.ca/internet/english/parl\\_oag\\_201111\\_04\\_e\\_35936.html#hd4d](http://www.oag-bvg.gc.ca/internet/english/parl_oag_201111_04_e_35936.html#hd4d) (accessed 25 September 2014).
21. The Institute of Medicine (IOM). Countering the Problem of Falsified and Substandard Drugs report (2013). <http://www.iom.edu/Reports/2013/Countering-the-Problem-of-Falsified-and-Substandard-Drugs.aspx> (accessed 25 September 2014).
22. Food and Drug Administration (FDA). Guidance for Industry: Product Recalls, Including Removals and Corrections, Rockville, MD, 2003. <http://www.fda.gov/Safety/Recalls/IndustryGuidance/ucm129259.htm>. (accessed 27 September 2014).
23. Health Canada. Health Products and Food Branch Inspectorate - Recall Policy (POL-0016), (2006). [http://www.hc-sc.gc.ca/dhp-mps/compli-conform/info-prod/drugs-droques/pol\\_0016\\_tc-tm-eng.php](http://www.hc-sc.gc.ca/dhp-mps/compli-conform/info-prod/drugs-droques/pol_0016_tc-tm-eng.php) (accessed 25 September 2014)
24. Health Canada. Compliance and Enforcement Policy (POL-0001), (2005). [http://www.hc-sc.gc.ca/dhp-mps/compli-conform/gmp-bpf/pol/pol\\_1\\_tc-tm-eng.php](http://www.hc-sc.gc.ca/dhp-mps/compli-conform/gmp-bpf/pol/pol_1_tc-tm-eng.php) (accessed 25 September 2014).
25. Association of the British Pharmaceutical Industry (ABPI). Global pharmaceutical industry and market. <http://www.abpi.org.uk/industry-info/knowledge-hub/global-industry/Pages/industry-market-.aspx> (accessed 25 September 2014).

## TABLES:

Table 1: Substandard medicines

| Defect Type                  | Number of medicines | %   | Defect details                                                                                                      | Number of medicines |
|------------------------------|---------------------|-----|---------------------------------------------------------------------------------------------------------------------|---------------------|
| Stability defects            | 205                 | 32  | Concern about stability of active ingredients                                                                       | 63                  |
|                              |                     |     | Levels of impurities in excess of specification at different time points                                            | 50                  |
|                              |                     |     | Dissolution, disintegration and drug release failure                                                                | 45                  |
|                              |                     |     | Others                                                                                                              | 47                  |
| Contamination                | 139                 | 21  | Impurities                                                                                                          | 82                  |
|                              |                     |     | Lack of sterility assurance                                                                                         | 35                  |
|                              |                     |     | Microbial contamination                                                                                             | 22                  |
| Minor packaging defects      | 71                  | 11  | Fault involving the external packaging or minor printing errors that do not involve name or strength of a medicines | 60                  |
|                              |                     |     | Missing or incorrect product registration number, batch number, manufacturer's name or expiry date                  | 11                  |
| Major packaging defects      | 65                  | 10  | Missing or incorrect name ,strength, or active ingredient of a medicine on carton or box                            | 35                  |
|                              |                     |     | Packing a medicine in the wrong carton or present of a foreign tablet or capsule in the bottle or blister           | 30                  |
| Defects in active ingredient | 62                  | 10  | Excessive amount of active ingredients                                                                              | 26                  |
|                              |                     |     | Inadequate amount of active ingredient                                                                              | 20                  |
|                              |                     |     | Active ingredient is out of specification                                                                           | 16                  |
| Delivery defects             | 35                  | 5   | Fault with a device                                                                                                 | 22                  |
|                              |                     |     | Leakage or loose/ tight seal ,cracks in a vial or broken tablets                                                    | 9                   |
|                              |                     |     | Others                                                                                                              | 4                   |
| Other defects                | 72                  | 11  | GMP deficiencies and deviation from preapproved specifications                                                      | 48                  |
|                              |                     |     | Inappropriate shipment                                                                                              | 14                  |
|                              |                     |     | Dissolution / disintegration failure                                                                                | 10                  |
| Total                        | 649                 | 100 |                                                                                                                     | 649                 |

**Table 2: Contaminated medicines subjected to urgent recalls (Health Product Recall type I).**

| Medications (number of incidents)                                                                                                | Formulation            | Defect description                                                                                                                  |
|----------------------------------------------------------------------------------------------------------------------------------|------------------------|-------------------------------------------------------------------------------------------------------------------------------------|
| Marcaine (2), acyclovir (1), nitroglycerin (1), magnesium sulfate (1), dexamethasone sodium (1), vistide (1) and carboplatin (1) | Solution for injection | Visible particulates were identified in the formulation (such as white, metallic or glass particles.)                               |
| Propofol (4) and fat emulsion (1)                                                                                                | Emulsion for injection |                                                                                                                                     |
| Extraneal (1) ciprofloxacin (1), carmustine (1), technetium Tc 99m (1) and liposomal amphotericin B (1)                          | Solution for injection | Microbial contamination (bacterial, fungal or viral contamination)                                                                  |
| Docusate sodium (1)                                                                                                              | Capsules               |                                                                                                                                     |
| Sucrose (1)                                                                                                                      | Oral liquid            |                                                                                                                                     |
| Benzalkonium chloride (1)                                                                                                        | Topical Liquid         |                                                                                                                                     |
| Sodium Chloride (1) and dextrose (1)                                                                                             | Solution for injection | Integrity of the foil seal is compromised leading to potential contamination of the vial adapter                                    |
| Diameal (1), DTE technetium Tc 99m (1), electrolyte infusion (1) and dextrose (1)                                                | Solution for injection | Lack of sterility assurance at the time of manufacture                                                                              |
| Gen Teal Artificial Tears (1)                                                                                                    | Ophthalmic Solution    |                                                                                                                                     |
| Heparin sodium (3)                                                                                                               | Solution for injection | Contamination with heparin-like contaminant                                                                                         |
| Quetiapine (3)                                                                                                                   | Tablets                | cross-contamination of trace amounts of clindamycin in quetiapine active pharmaceutical ingredient during the manufacturing process |

**Note:** All medicines were reported using health Product Recall Type I document

**Table 3: Substandard medicines subjected to urgent recalls (Health Product Recall type I and PW) with other defect types**

| Type of defect                                          | Medications (number of incidents)                                                                                                  | Formulation                                                                                           | Defect description                                                                                                                                                                                                                                                                                                                                                                                                                   |
|---------------------------------------------------------|------------------------------------------------------------------------------------------------------------------------------------|-------------------------------------------------------------------------------------------------------|--------------------------------------------------------------------------------------------------------------------------------------------------------------------------------------------------------------------------------------------------------------------------------------------------------------------------------------------------------------------------------------------------------------------------------------|
| <b>Major packaging defects</b><br>(incorrect labelling) | Trazodone (1), amlodipine (1) and fluvoxamine (1)                                                                                  | Tablets                                                                                               | Some products contained the wrong medicines due to labelling errors (e.g., amlodipine instead of minocycline, minocycline instead of amlodipine, clonazepam instead of rifampicin and fluphenazine instead of Octreotide) or filling errors (e.g., nabilone instead of trazodone, ciprofloxacin instead of fluvoxamine, trazodone instead of nabilone, Isoproterenol instead of morphine and blue collyrium instead of prednisolone) |
|                                                         | Nabilone (1), minocycline (1) and rifampicin (1)                                                                                   | Capsules                                                                                              |                                                                                                                                                                                                                                                                                                                                                                                                                                      |
|                                                         | Morphine sulphate (1) and octreotide acetate omega (1)                                                                             | Solution for injection                                                                                |                                                                                                                                                                                                                                                                                                                                                                                                                                      |
|                                                         | Prednisolone (1)*                                                                                                                  | Ophthalmic solution                                                                                   |                                                                                                                                                                                                                                                                                                                                                                                                                                      |
|                                                         | Hemodialysis acid concentrates (1), remifentanil HCl (1), pamidronate disodium (1), tobramycin (1) and triamcinolone acetonide (1) | Solution for injection                                                                                | Wrong strength , dosage or expiry date were printed on the packaging                                                                                                                                                                                                                                                                                                                                                                 |
|                                                         | Sodium solysterene sulfonate (1)                                                                                                   | Suspension                                                                                            |                                                                                                                                                                                                                                                                                                                                                                                                                                      |
|                                                         | Acetaminophen (1)                                                                                                                  | Suppositories                                                                                         |                                                                                                                                                                                                                                                                                                                                                                                                                                      |
|                                                         | Personnelle cold and flu tablets (2), acetylsalicylic acid (1), acetaminophen (1) and Personelle acid control (1)                  | Tablets                                                                                               | Important mandatory warning statement was missed on the external packaging                                                                                                                                                                                                                                                                                                                                                           |
|                                                         | Oral contraceptive pills (4)                                                                                                       | Tablets                                                                                               | Additional placebo tablet was found in place of an active tablet in one blister pack raising the risk of unwanted pregnancy                                                                                                                                                                                                                                                                                                          |
| Ibuprofen (2)                                           | Tablets                                                                                                                            | The label stated that the bottle had a child resistant cap, but the cap used was not child resistant. |                                                                                                                                                                                                                                                                                                                                                                                                                                      |
| <b>Stability defects</b>                                | Smallpox vaccine (1)                                                                                                               | Solution for injection                                                                                | Evidence of instability based on its appearance.                                                                                                                                                                                                                                                                                                                                                                                     |
|                                                         | Timolol (1)                                                                                                                        | Ophthalmic Solution                                                                                   | Active ingredient was out of specification after 12 month of production date                                                                                                                                                                                                                                                                                                                                                         |
|                                                         | Valproic acid (1)                                                                                                                  | Capsules                                                                                              | Disintegration test failure within the shelf life of the drug                                                                                                                                                                                                                                                                                                                                                                        |
|                                                         | Amoxicillin (1)                                                                                                                    | Suspension                                                                                            | Out of specification assay result was obtained at various time points.                                                                                                                                                                                                                                                                                                                                                               |
| <b>Active ingredients defects</b>                       | Phenobarbital (1)* and morphine SR (1)                                                                                             | Tablets                                                                                               | Oversized tablets were found raising the risk of overdose                                                                                                                                                                                                                                                                                                                                                                            |
|                                                         | Acetylsalicylic acid (1)                                                                                                           |                                                                                                       | Inadequate amount of active ingredient                                                                                                                                                                                                                                                                                                                                                                                               |
|                                                         | Delflex (1) and carmustine (1)                                                                                                     | Solution for injection                                                                                | Excessive amount of active ingredients                                                                                                                                                                                                                                                                                                                                                                                               |
|                                                         | Ethacrynic acid (1)                                                                                                                |                                                                                                       | Inadequate amount of active ingredient                                                                                                                                                                                                                                                                                                                                                                                               |
| <b>Delivery defects</b>                                 | Paliperidone palmitate (1), nutrinal (1), degarelix (1), caspofungin acetate (1), vancomycin (1) and argatroban (1)                | Solution for injection                                                                                | Cracks in the syringes or vials , or leaks from the bags were identified raising the risk of contamination                                                                                                                                                                                                                                                                                                                           |
|                                                         | Sumatriptan (1)                                                                                                                    |                                                                                                       | Pre-filled syringes were filled with needles that protruded through the needle shield                                                                                                                                                                                                                                                                                                                                                |
|                                                         | Morphine sulphate (1)                                                                                                              |                                                                                                       | Plunger friction with the vial may cause pump occlusion or delivery of inaccurate dose                                                                                                                                                                                                                                                                                                                                               |
|                                                         | Cough and Cold syrup (9)                                                                                                           | Syrup                                                                                                 | The child-resistant feature of the bottle cap was not functioning properly                                                                                                                                                                                                                                                                                                                                                           |
| <b>Other</b>                                            | Hypromellose (1)                                                                                                                   | lubricant eye gel                                                                                     | Non-compliance with Good manufacturing practices                                                                                                                                                                                                                                                                                                                                                                                     |

\*Medicine was reported using the Public Warning document. Others were reported using Health Product Recall type I

**Table 4: Substandard medicines categorised by type of marketing authorisation holders**

| Type of quality defect | Medicines marketed by manufacturers<br>(n = 122) | Medicines marketed by distributors<br>(n = 26) | P-Value* |
|------------------------|--------------------------------------------------|------------------------------------------------|----------|
|                        | Number of medicines, (%)                         | Number of medicines, (%)                       |          |
| Stability              | 191 (31)                                         | 14 (37)                                        | 0.476    |
| Contamination          | 134 (22)                                         | 5 (13)                                         | 0.228    |
| Minor packaging        | 69 (11)                                          | 2 (5)                                          | 0.417    |
| Major packaging        | 60 (10)                                          | 5 (13)                                         | 0.573    |
| Active ingredient      | 59 (10)                                          | 3 (8)                                          | 1.000    |
| Delivery               | 34 (5)                                           | 1 (3)                                          | 0.714    |
| Others                 | 64 (11)                                          | 8 (21)                                         | 0.058    |
| <b>Total</b>           | <b>611 (100)</b>                                 | <b>38 (100)</b>                                |          |

\*A significant difference was defined at a p value <0.05.

### Figure legends:

Figure 1: Flow diagram of search and resulting incidents.

Figure 2: Number of incidents of defective medicines reported by Health Canada.

Figure 3: Comparison between Canada and the UK in the types of substandard medicines.

1  
2  
3  
4  
5  
6  
7  
8  
9  
10  
11  
12  
13  
14  
15  
16  
17  
18  
19  
20  
21  
22  
23  
24  
25  
26  
27  
28  
29  
30  
31  
32  
33  
34  
35  
36  
37  
38  
39  
40  
41  
42  
43  
44  
45  
46  
47  
48  
49  
50  
51  
52  
53  
54  
55  
56  
57  
58  
59  
60



Figure 1: Flow diagram of search and resulting incidents.  
148x103mm (300 x 300 DPI)

view only

1  
2  
3  
4  
5  
6  
7  
8  
9  
10  
11  
12  
13  
14  
15  
16  
17  
18  
19  
20  
21  
22  
23  
24  
25  
26  
27  
28  
29  
30  
31  
32  
33  
34  
35  
36  
37  
38  
39  
40  
41  
42  
43  
44  
45  
46  
47  
48  
49  
50  
51  
52  
53  
54  
55  
56  
57  
58  
59  
60

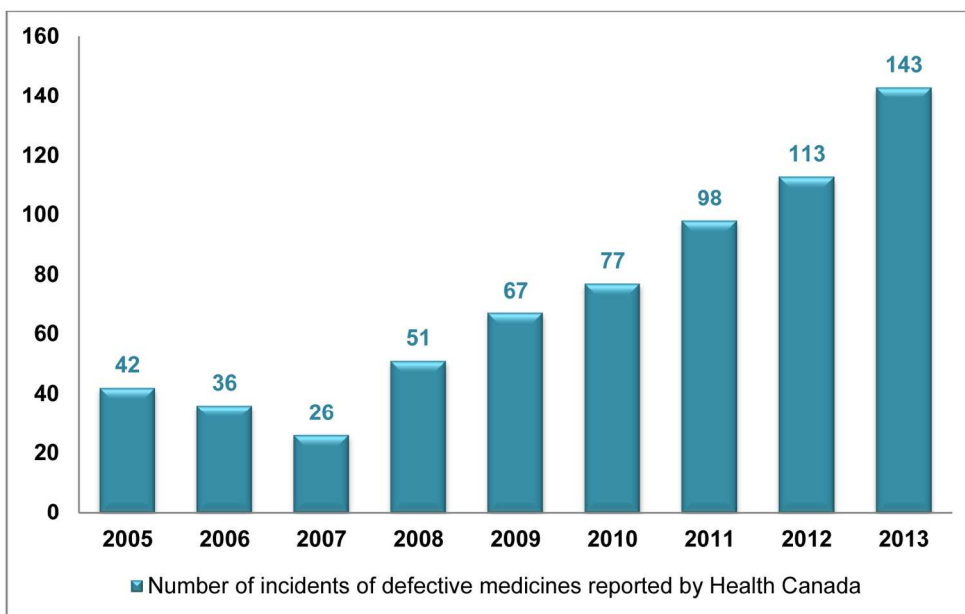

Figure 2: Number of incidents of defective medicines reported by Health Canada.  
155x97mm (300 x 300 DPI)

review only



1  
2  
3  
4  
5  
6  
7  
8  
9  
10  
11  
12  
13  
14  
15  
16  
17  
18  
19  
20  
21  
22  
23  
24  
25  
26  
27  
28  
29  
30  
31  
32  
33  
34  
35  
36  
37  
38  
39  
40  
41  
42  
43  
44  
45  
46  
47  
48  
49  
50  
51  
52  
53  
54  
55  
56  
57  
58  
59  
60

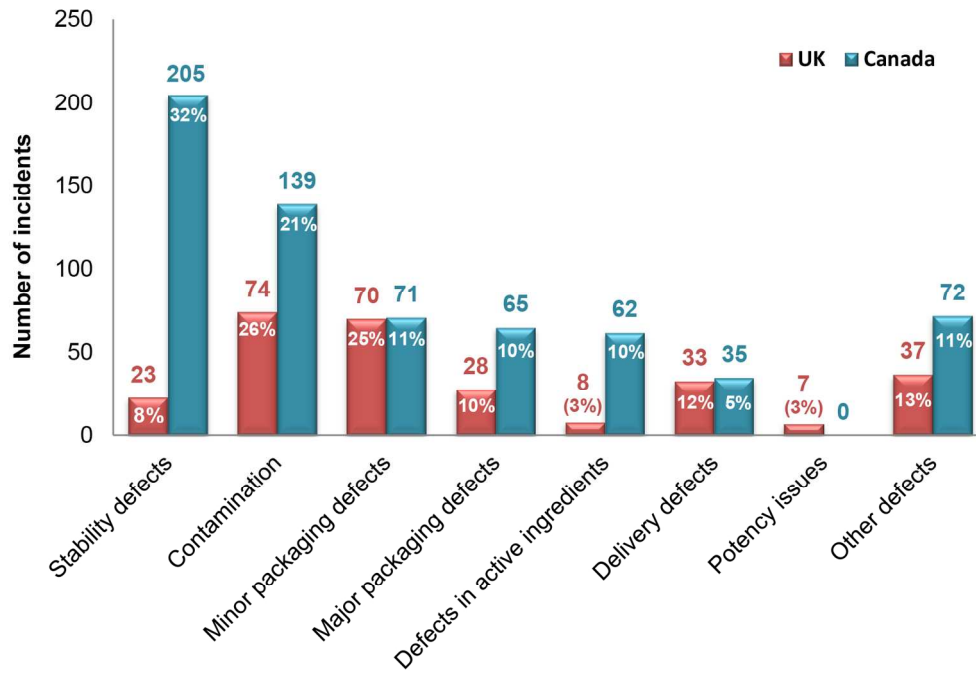

Figure 3: Comparison between Canada and the UK in the types of substandard medicines reported. Percentages are given based on the total number of incidents reported in each country.  
151x103mm (300 x 300 DPI)

View only

**Supplementary data:****Table 1: Number of formulations under each defect type of substandard medicines**

| Defect Type                 | Formulation type     | Number of formulations |
|-----------------------------|----------------------|------------------------|
| Stability defect            | Tablets              | 89                     |
|                             | Parenteral           | 46                     |
|                             | Topical preparations | 34                     |
|                             | Capsules             | 24                     |
|                             | Liquid preparations  | 12                     |
| Contamination               | Parenteral           | 71                     |
|                             | Tablets              | 29                     |
|                             | Topical preparations | 21                     |
|                             | Liquid preparations  | 11                     |
|                             | Capsules             | 7                      |
| Minor packaging defect      | Tablets              | 39                     |
|                             | Parenteral           | 14                     |
|                             | Capsules             | 9                      |
|                             | Liquid preparations  | 5                      |
|                             | Topical preparations | 4                      |
| Major packaging defects     | Tablets              | 35                     |
|                             | Parenteral           | 13                     |
|                             | Capsules             | 11                     |
|                             | Topical preparations | 6                      |
| Defect in active ingredient | Tablets              | 18                     |
|                             | Topical preparations | 16                     |
|                             | Parenteral           | 13                     |
|                             | Liquid preparations  | 8                      |
|                             | Capsules             | 6                      |
| Delivery defect             | Parenteral           | 11                     |
|                             | Liquid preparations  | 10                     |
|                             | Topical preparations | 8                      |
|                             | Tablets              | 6                      |
|                             | Capsules             | 1                      |
| Other defects               | Tablets              | 35                     |
|                             | Parenteral           | 20                     |
|                             | Topical preparations | 11                     |
|                             | Liquid preparations  | 3                      |
|                             | Capsules             | 3                      |
| Total                       |                      | 649                    |

**Table 2: Substandard medicines subjected to semi-urgent communications (Health Product Recall - Types II and II, PA, HPC-NtoH and HPC-DHCPL)**

| Type of defect               | Health Product Recalls - type II | Health Product Recalls - type II | PA       | HPC-NtoH | HPC-DHCPL | Type of drug recall was not stated |
|------------------------------|----------------------------------|----------------------------------|----------|----------|-----------|------------------------------------|
| Stability defects            | 90                               | 107                              | 0        | 0        | 1         | 0                                  |
| Contamination                | 68                               | 25                               | 1        | 6        | 2         | 0                                  |
| Minor packaging defects      | 22                               | 47                               | 0        | 2        | 0         | 0                                  |
| Defects in active ingredient | 33                               | 22                               | 0        | 0        | 1         | 1                                  |
| Major packaging defects      | 23                               | 12                               | 1        | 1        | 0         | 1                                  |
| Delivery defects             | 10                               | 6                                | 5        | 0        | 2         | 0                                  |
| Other issues                 | 42                               | 26                               | 1        | 0        | 1         | 1                                  |
| <b>Total</b>                 | <b>288</b>                       | <b>245</b>                       | <b>8</b> | <b>9</b> | <b>7</b>  | <b>3</b>                           |

**PA:** Public Advisory; **HPC-DHCPL:** Healthcare Professional Communication - Dear Health Care Professional Letter; **HPC-NtoH:** Healthcare Professional Communication - Notice to Hospitals

**Table 3: Substandard medicines reported by Health Canada, classified according to the organ or system in which they act and according to the therapeutic subgroup they belong (Classification ATC) 2005-2013:**

| Category                                                            | No.        | %          | Category                                                                                                                                                            | No.                                 | %                                             |
|---------------------------------------------------------------------|------------|------------|---------------------------------------------------------------------------------------------------------------------------------------------------------------------|-------------------------------------|-----------------------------------------------|
| According to organ or system in which the drug acts                 |            |            | According to subgroup, therapeutic main group                                                                                                                       |                                     |                                               |
| Nervous system                                                      | 141        | 21.7       | Analgesics<br>Psycholeptics<br>Psychoanaleptics<br>Anaesthetics<br>Antiepileptics<br>Anti-parkinson drugs                                                           | 65<br>26<br>18<br>15<br>13<br>4     | 10.0<br>4.0<br>2.8<br>2.3<br>2.0<br>0.6       |
| Alimentary tract and metabolism                                     | 90         | 13.9       | Drugs for acid related disorders<br>Vitamins<br>Mineral supplements<br>Laxatives<br>Drugs used in diabetes<br>Drugs for constipation<br>Stomatological preparations | 25<br>22<br>16<br>12<br>9<br>3<br>3 | 3.9<br>3.4<br>2.5<br>1.8<br>1.4<br>0.5<br>0.5 |
| Cardiovascular System                                               | 83         | 12.8       | Antihypertensives<br>Lipid modifying agents<br>Cardiac therapy                                                                                                      | 50<br>24<br>9                       | 7.7<br>3.7<br>1.4                             |
| Anti-infectives for systemic use                                    | 65         | 10.0       | Antibacterials for systemic use<br>Antimycotics for systemic use<br>Immune sera and immunoglobulins<br>Vaccines<br>Antivirals for systemic use                      | 38<br>8<br>8<br>6<br>5              | 5.9<br>1.2<br>1.2<br>0.9<br>0.8               |
| Blood and blood forming organs                                      | 63         | 9.7        | Blood substitutes and perfusion solutions<br>Antithrombotic agents<br>Antianemic preparations                                                                       | 30<br>19<br>14                      | 4.6<br>2.9<br>2.2                             |
| Dermatologicals                                                     | 46         | 7.1        | Corticosteroids, dermatological preparations<br>Other dermatological preparations<br>Anti-acne preparations<br>Antifungals for dermatological use                   | 18<br>14<br>9<br>5                  | 2.8<br>2.2<br>1.4<br>0.8                      |
| Respiratory system                                                  | 31         | 4.8        | Antihistamines for systemic use<br>Cough and cold preparations<br>Drugs for obstructive airway diseases<br>Nasal preparations                                       | 11<br>11<br>7<br>2                  | 1.7<br>1.7<br>1.1<br>0.3                      |
| Genito-urinary system and sex hormones                              | 29         | 4.5        | Sex hormones and modulators of the genital system<br>Urologicals<br>Gynecological antiinfectives and antiseptics                                                    | 22<br>5<br>2                        | 3.4<br>0.8<br>0.3                             |
| Antineoplastic and immunomodulating agents                          | 28         | 4.3        | Antineoplastic agents<br>Immunosuppressants<br>Immunostimulants<br>Endocrine therapy                                                                                | 18<br>4<br>4<br>2                   | 2.8<br>0.6<br>0.6<br>0.3                      |
| Various                                                             | 26         | 4.0        | Diagnostic radiopharmaceuticals<br>All other therapeutic products<br>Contrast media                                                                                 | 20<br>4<br>2                        | 3.1<br>0.6<br>0.3                             |
| Sensory organs                                                      | 21         | 3.2        | Ophthalmologicals<br>Otolologicals                                                                                                                                  | 20<br>1                             | 3.1<br>0.2                                    |
| Musculo-skeletal system                                             | 18         | 2.8        | Antiinflammatory and antirheumatic products<br>Drugs for treatment of bone diseases<br>Muscle relaxants                                                             | 11<br>6<br>1                        | 1.7<br>0.9<br>0.2                             |
| Systemic hormonal preparations, excluding sex hormones and insulins | 8          | 1.2        | Pituitary and hypothalamic hormones and analogues<br>Pancreatic hormones<br>Pituitary and hypothalamic hormones and analogues                                       | 3<br>3<br>2                         | 0.5<br>0.5<br>0.3                             |
| <b>Total</b>                                                        | <b>649</b> | <b>100</b> | <b>Total</b>                                                                                                                                                        | <b>649</b>                          | <b>100</b>                                    |

**Table 4: Substandard medicines categorised by manufacturers and type of defects**

| Manufacturer*                        | Number of medicines under each type of quality defect |               |                 |                   |                 |          |        | Total      | Percentage | Total number of medicines marketed by each manufacturer in Canada |
|--------------------------------------|-------------------------------------------------------|---------------|-----------------|-------------------|-----------------|----------|--------|------------|------------|-------------------------------------------------------------------|
|                                      | Stability                                             | Contamination | Minor packaging | Active ingredient | Major packaging | Delivery | Others |            |            |                                                                   |
| Apotex Inc.                          | 31                                                    | 13            | 4               | 2                 | 2               | 2        | 3      | 57         | 9          | 220                                                               |
| Teva Canada Ltd.                     | 15                                                    | 11            | 5               | 7                 | 10              | 2        | 3      | 53         | 8          | 224                                                               |
| Pharmascience Inc.                   | 12                                                    | 3             | 3               | 6                 | 6               | 2        | 3      | 35         | 5          | 173                                                               |
| Vita Health Products Inc.            | 4                                                     | 0             | 14              | 4                 | 10              | 1        | 0      | 33         | 5          | NA                                                                |
| Sandoz Canada Inc.                   | 5                                                     | 8             | 1               | 12                | 5               | 0        | 0      | 31         | 5          | 232                                                               |
| Hospira Healthcare Co.               | 1                                                     | 13            | 0               | 0                 | 0               | 3        | 9      | 26         | 4          | 94                                                                |
| Novartis Pharmaceuticals Canada Inc. | 4                                                     | 2             | 1               | 1                 | 1               | 13       | 1      | 23         | 4          | 114                                                               |
| Pfizer Canada Inc.                   | 10                                                    | 2             | 4               | 1                 | 1               | 1        | 1      | 20         | 3          | 120                                                               |
| GlaxoSmithKline Inc.                 | 3                                                     | 8             | 2               | 6                 | 0               | 1        | 0      | 20         | 3          | 77                                                                |
| Baxter Co.                           | 2                                                     | 8             | 4               | 0                 | 1               | 1        | 0      | 16         | 2          | 58                                                                |
| Sanofi-Aventis Canada Inc.           | 4                                                     | 1             | 2               | 5                 | 0               | 0        | 4      | 16         | 2          | 76                                                                |
| Laboratoire Riva Inc                 | 11                                                    | 1             | 0               | 0                 | 0               | 0        | 1      | 13         | 2          | NA                                                                |
| Pro-Doc Ltd.                         | 5                                                     | 3             | 0               | 0                 | 1               | 0        | 3      | 12         | 2          | 158                                                               |
| Mylan pharmaceuticals                | 0                                                     | 0             | 2               | 1                 | 4               | 1        | 3      | 11         | 2          | 145                                                               |
| Pharmetics Inc.                      | 1                                                     | 3             | 0               | 0                 | 0               | 0        | 2      | 10         | 2          | NA                                                                |
| JAMP Pharma Co.                      | 4                                                     | 1             | 1               | 3                 | 0               | 0        | 1      | 10         | 2          | 37                                                                |
| Pharmaceutical Partners of Canada.   | 2                                                     | 3             | 0               | 0                 | 1               | 1        | 2      | 9          | 1          | 40                                                                |
| Schering-Plough Canada Inc.          | 3                                                     | 1             | 2               | 0                 | 0               | 0        | 2      | 8          | 1          | 72                                                                |
| McNeil Consumer Products Co.         | 0                                                     | 2             | 1               | 0                 | 0               | 0        | 5      | 8          | 1          | 28                                                                |
| Taro Pharmaceuticals Inc.            | 3                                                     | 3             | 0               | 0                 | 0               | 0        | 1      | 7          | 1          | 21                                                                |
|                                      |                                                       |               |                 |                   |                 |          |        | <b>418</b> | <b>64</b>  |                                                                   |

\*Only the top 20 manufacturers are listed.
